# Supplementary material for: Synthesis of a Glucuronic Acid‐Containing Thioglycoside Trisaccharide Building Block and Its Use in the Assembly of Cryptococcus Neoformans Capsular Polysaccharide Fragments
Source: PubMed Central journal article supplement — ChemistryOpen. 2015 Aug 18;4(6):729–39. doi: 10.1002/open.201500143 (PMC4906494; doi:10.1002/open.201500143), 2015-08-18

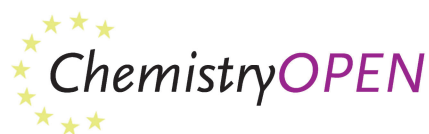

## Supporting Information

© 2015 The Authors. Published by Wiley-VCH Verlag GmbH & Co. KGaA, Weinheim

### **Synthesis of a Glucuronic Acid-Containing Thioglycoside Trisaccharide Building Block and Its Use in the Assembly of *Cryptococcus Neoformans* Capsular Polysaccharide Fragments\*\***

Lorenzo Guazzelli, Rebecca Ulc, and Stefan Oscarson\*<sup>[a]</sup>

open\_201500143\_sm\_miscellaneous\_information.pdf

## Supporting information

### Table of contents

|                                                                                                                            |               |
|----------------------------------------------------------------------------------------------------------------------------|---------------|
| $^1\text{H}$ - and $^{13}\text{C}$ - NMR spectra of compound <b>2</b>                                                      | pages S2-S3   |
| $^1\text{H}$ - and $^{13}\text{C}$ - NMR spectra of compound <b>4</b>                                                      | pages S4-S5   |
| $^1\text{H}$ - and $^{13}\text{C}$ spectra of compound <b>5</b>                                                            | pages SS6-S7  |
| $^1\text{H}$ - and $^{13}\text{C}$ spectra of compound <b>6</b>                                                            | pages S8-S9   |
| $^1\text{H}$ - and $^{13}\text{C}$ spectra of compound <b>7</b>                                                            | pages S10-S11 |
| $^1\text{H}$ -, $^{13}\text{C}$ -, $^1\text{H}$ - $^{13}\text{C}$ HSQC NMR spectra of compound <b>8</b> at 25 °C and 50 °C | pages S12-S17 |
| $^1\text{H}$ - and $^{13}\text{C}$ -NMR spectra of compound <b>9</b>                                                       | pages S18-S19 |
| $^1\text{H}$ - and $^{13}\text{C}$ -NMR spectra of compound <b>11</b>                                                      | pages S20-S21 |
| $^1\text{H}$ - and $^{13}\text{C}$ -NMR spectra of compound <b>12</b>                                                      | pages S22-S23 |
| $^1\text{H}$ - and $^{13}\text{C}$ -NMR spectra of compound <b>14</b>                                                      | pages S24-S25 |
| $^1\text{H}$ - and $^{13}\text{C}$ -NMR spectra of compound <b>15</b>                                                      | pages S26-S27 |
| $^1\text{H}$ - and $^{13}\text{C}$ -NMR spectra of compound <b>17</b>                                                      | pages S28-S29 |
| $^1\text{H}$ - and $^{13}\text{C}$ -NMR spectra of compound <b>18</b>                                                      | pages S30-S31 |
| $^1\text{H}$ - and $^{13}\text{C}$ -NMR spectra of compound <b>19</b>                                                      | pages S32-S33 |
| $^1\text{H}$ - and $^{13}\text{C}$ -NMR spectra of compound <b>20</b>                                                      | pages S34-S35 |
| $^1\text{H}$ - and $^{13}\text{C}$ -NMR spectra of compound <b>21</b>                                                      | pages S36-S37 |
| $^1\text{H}$ - and $^{13}\text{C}$ -NMR spectra of compound <b>22</b>                                                      | pages S38-S39 |
| $^1\text{H}$ - and $^{13}\text{C}$ -NMR spectra of compound <b>23</b>                                                      | pages S40-S41 |
| $^1\text{H}$ - and $^{13}\text{C}$ -NMR spectra of compound <b>24</b>                                                      | pages S42-S43 |
| $^1\text{H}$ - and $^{13}\text{C}$ -NMR spectra of compound <b>26</b>                                                      | pages S44-S45 |
| $^1\text{H}$ - and $^{13}\text{C}$ -NMR spectra of compound <b>27</b>                                                      | pages S46-S47 |
| $^1\text{H}$ - and $^{13}\text{C}$ -NMR spectra of compound <b>28</b>                                                      | pages S48-S49 |
| $^1\text{H}$ - and $^{13}\text{C}$ -NMR spectra of compound <b>29</b>                                                      | pages S50-S51 |



Fig 2:  $^{13}\text{C}$  NMR of **2** at 25 °C

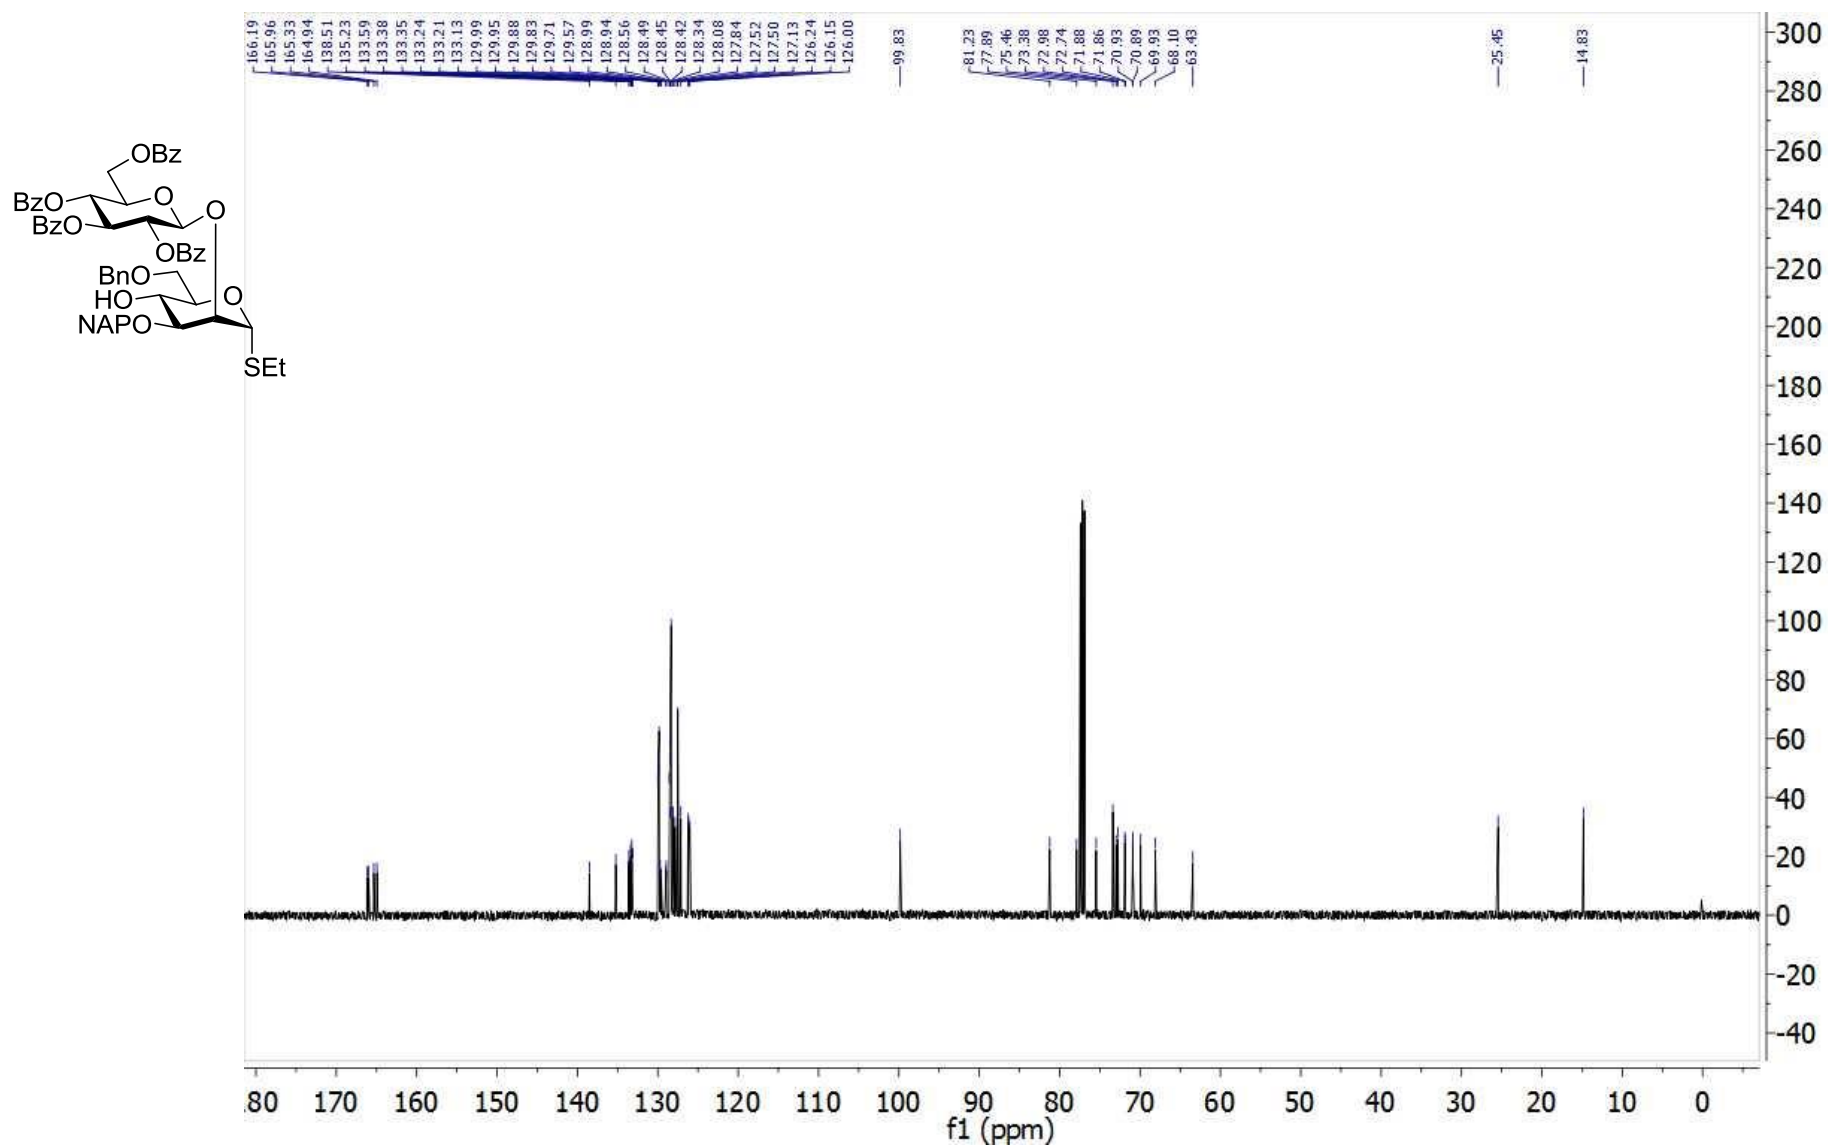

Fig 3:  $^1\text{H}$  NMR of 4 at 25 °C

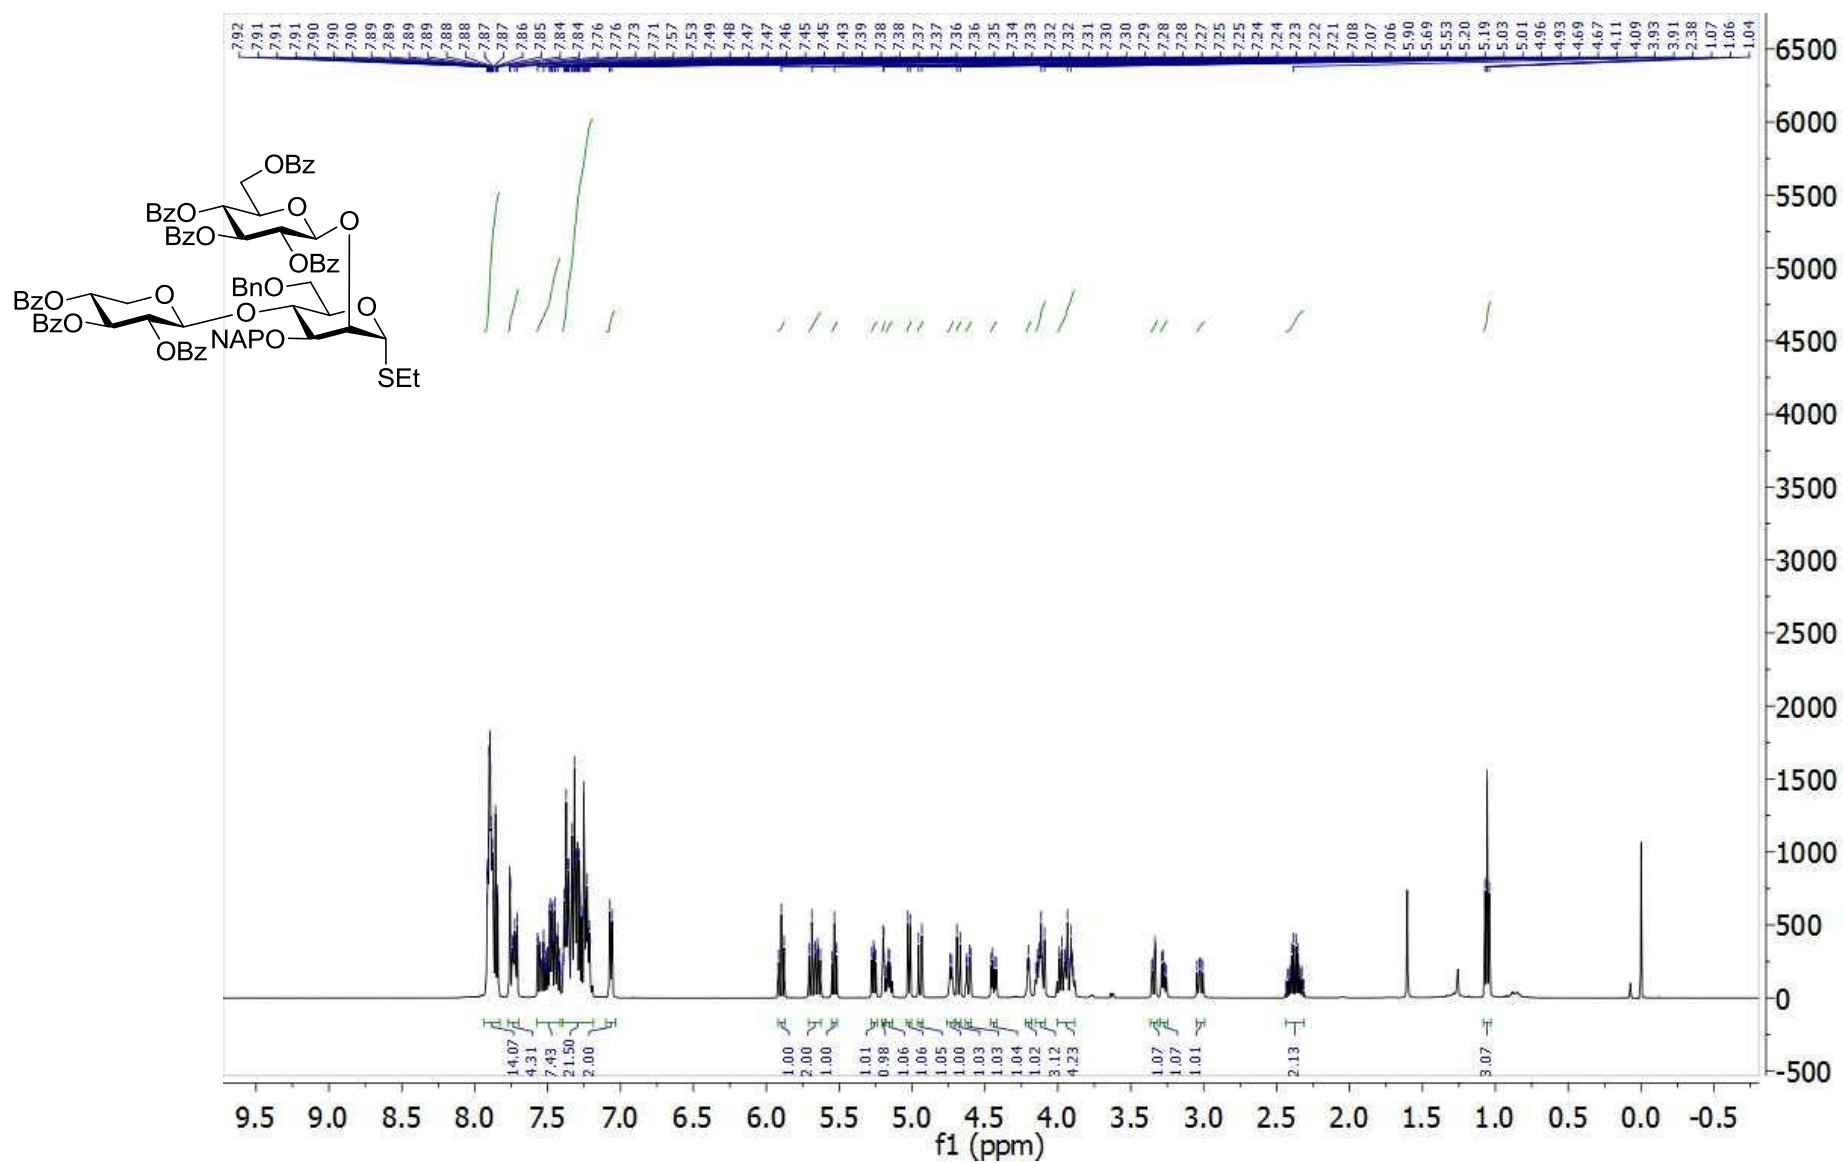

Fig 4:  $^{13}\text{C}$  NMR of **4** at 25 °C

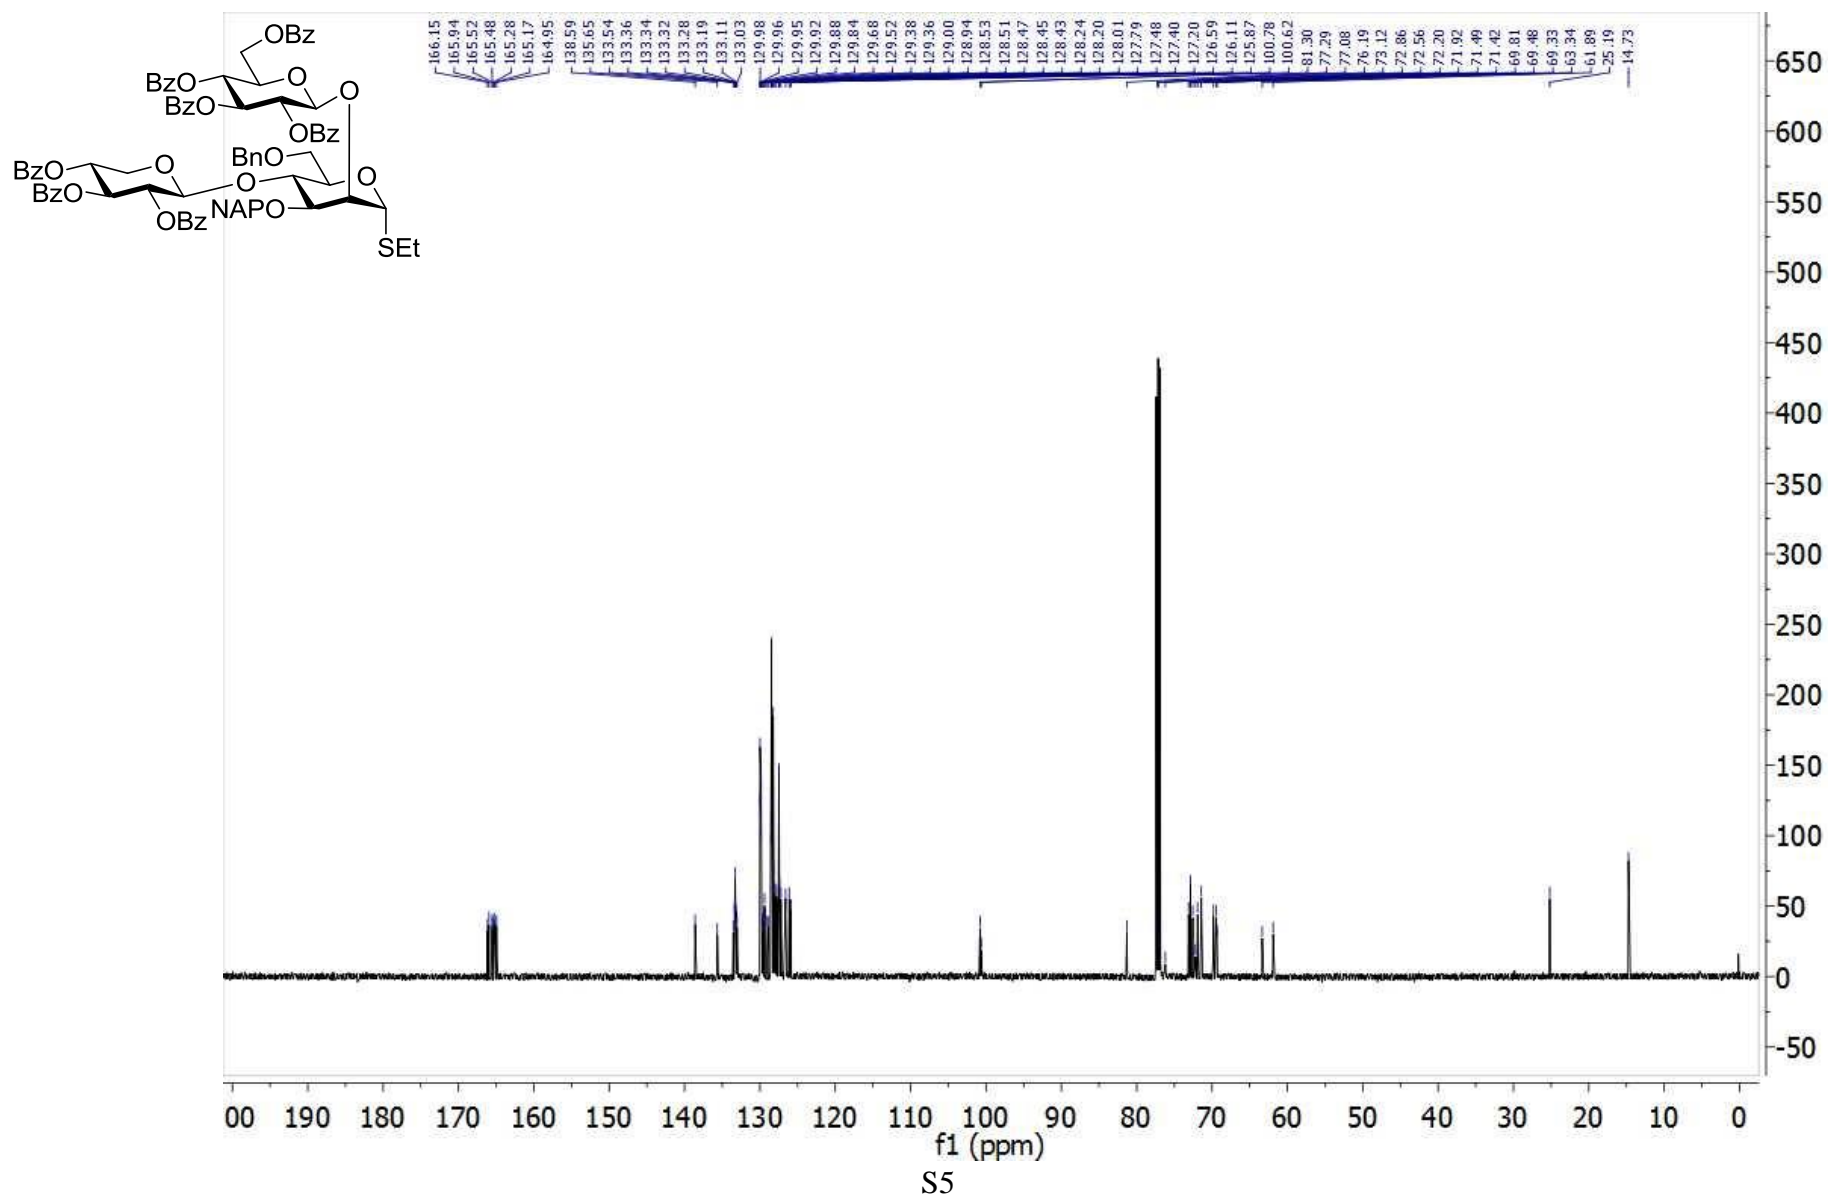

Fig 5: <sup>1</sup>H NMR of **5** at 25 °C

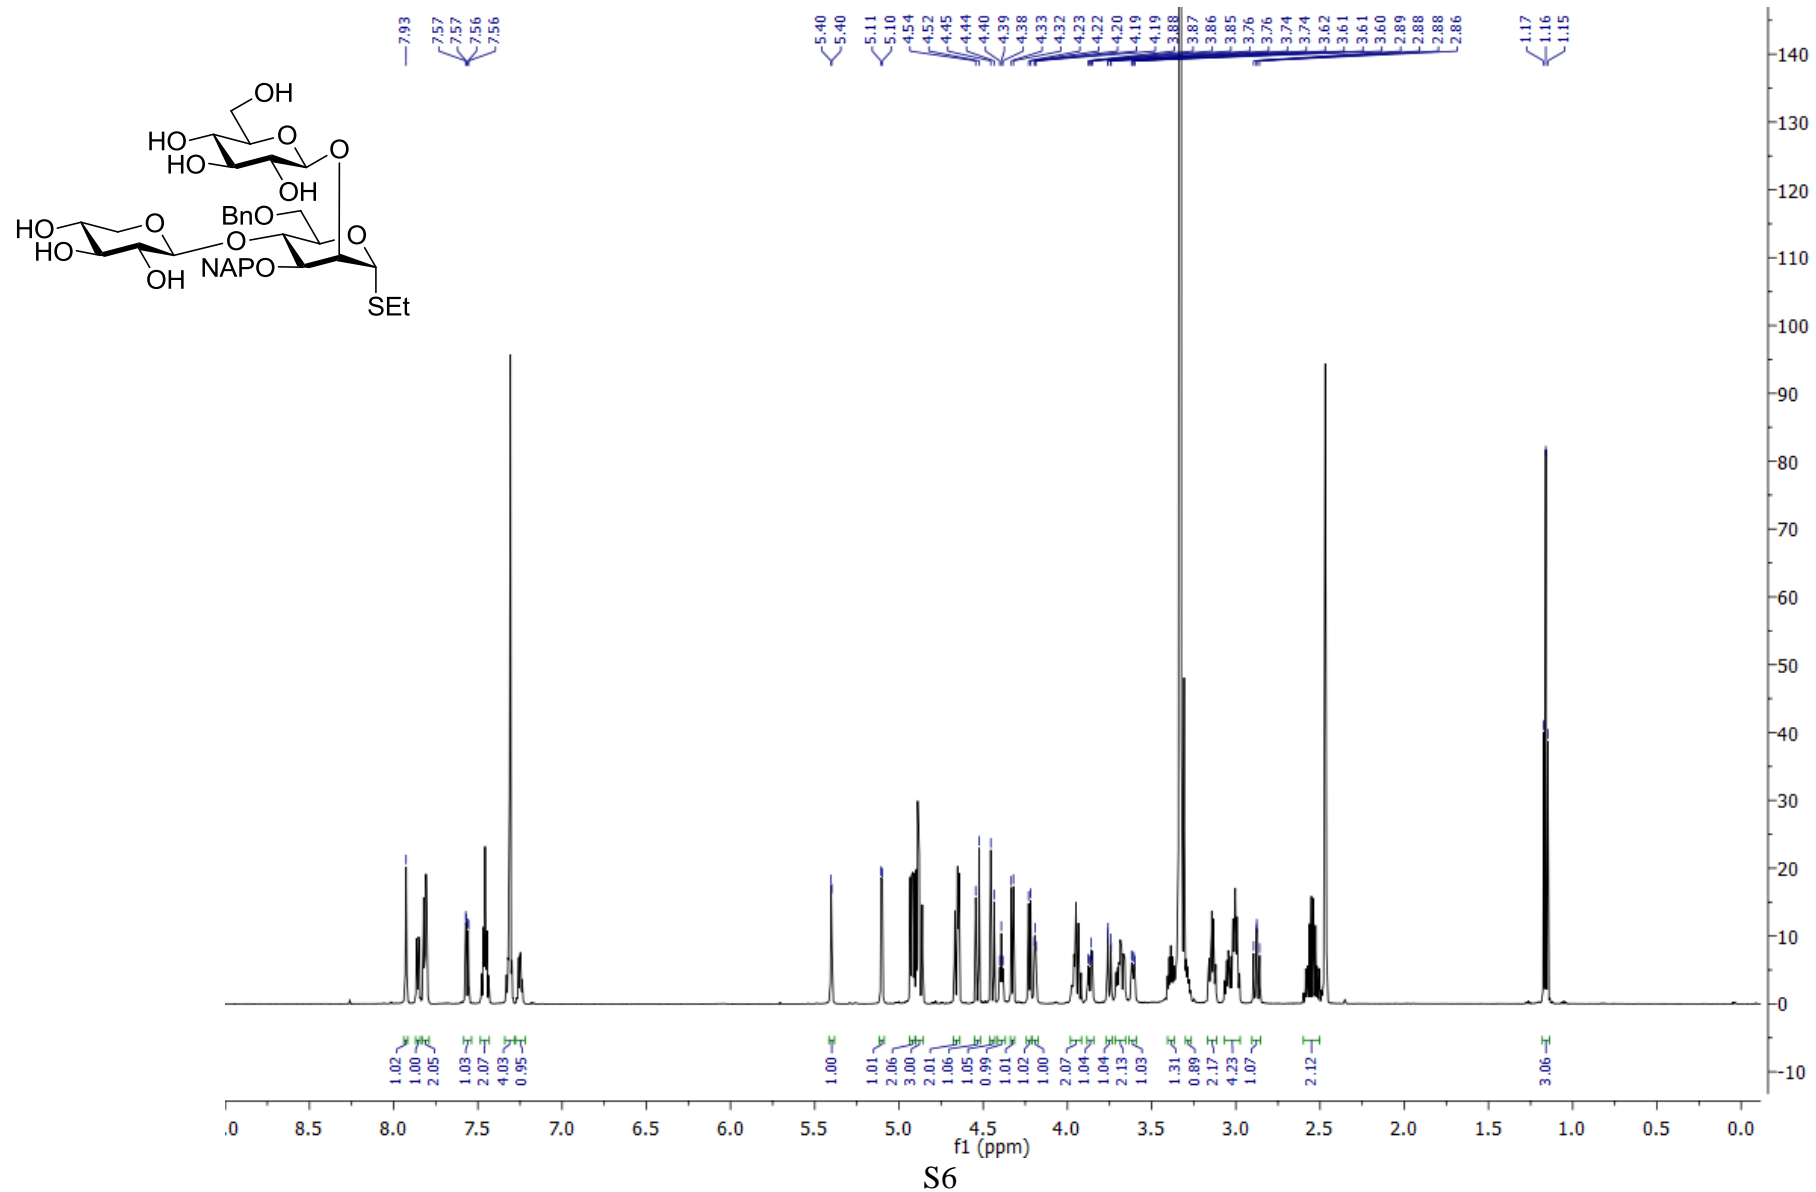

Fig 6:  $^{13}\text{C}$  NMR of **5** at 25 °C

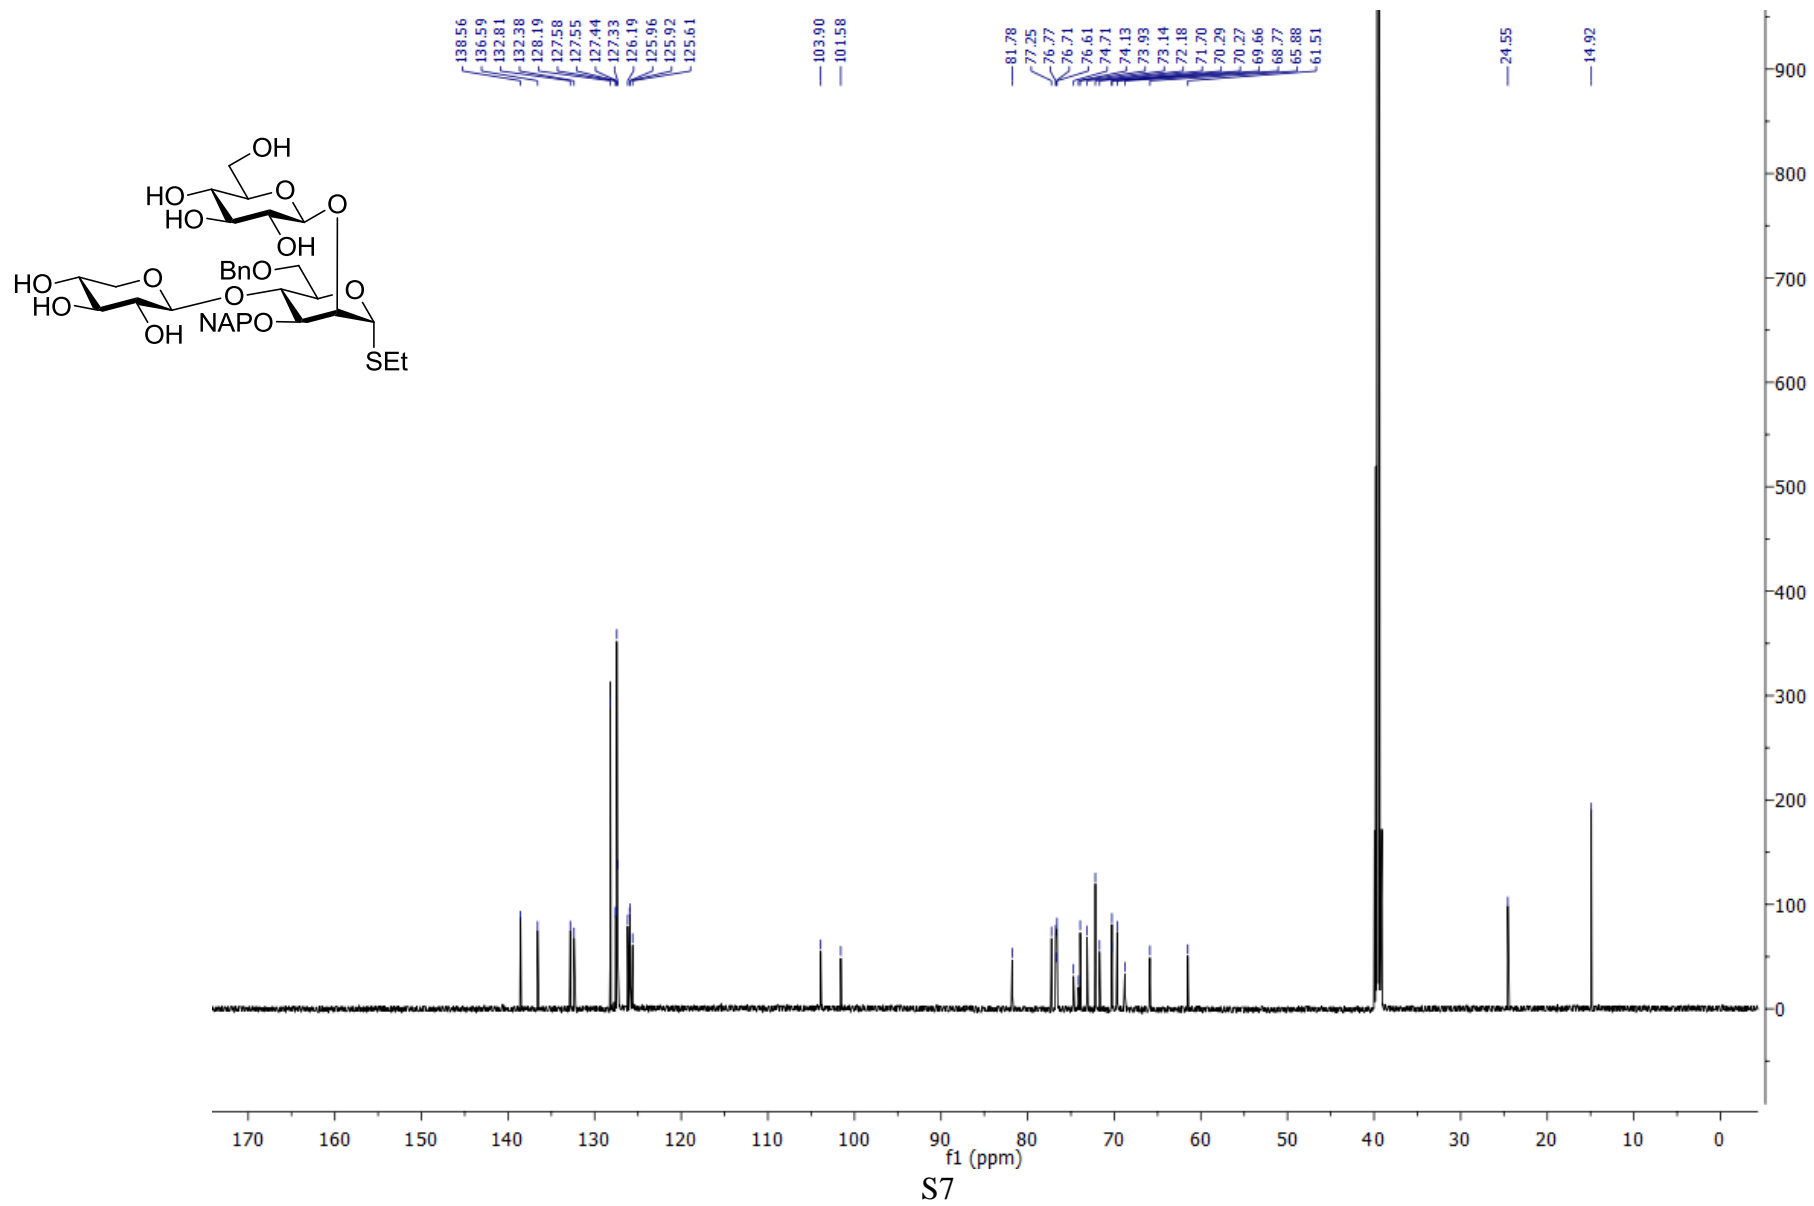



Fig 7:  $^1\text{H}$  NMR of 6 at 25 °C

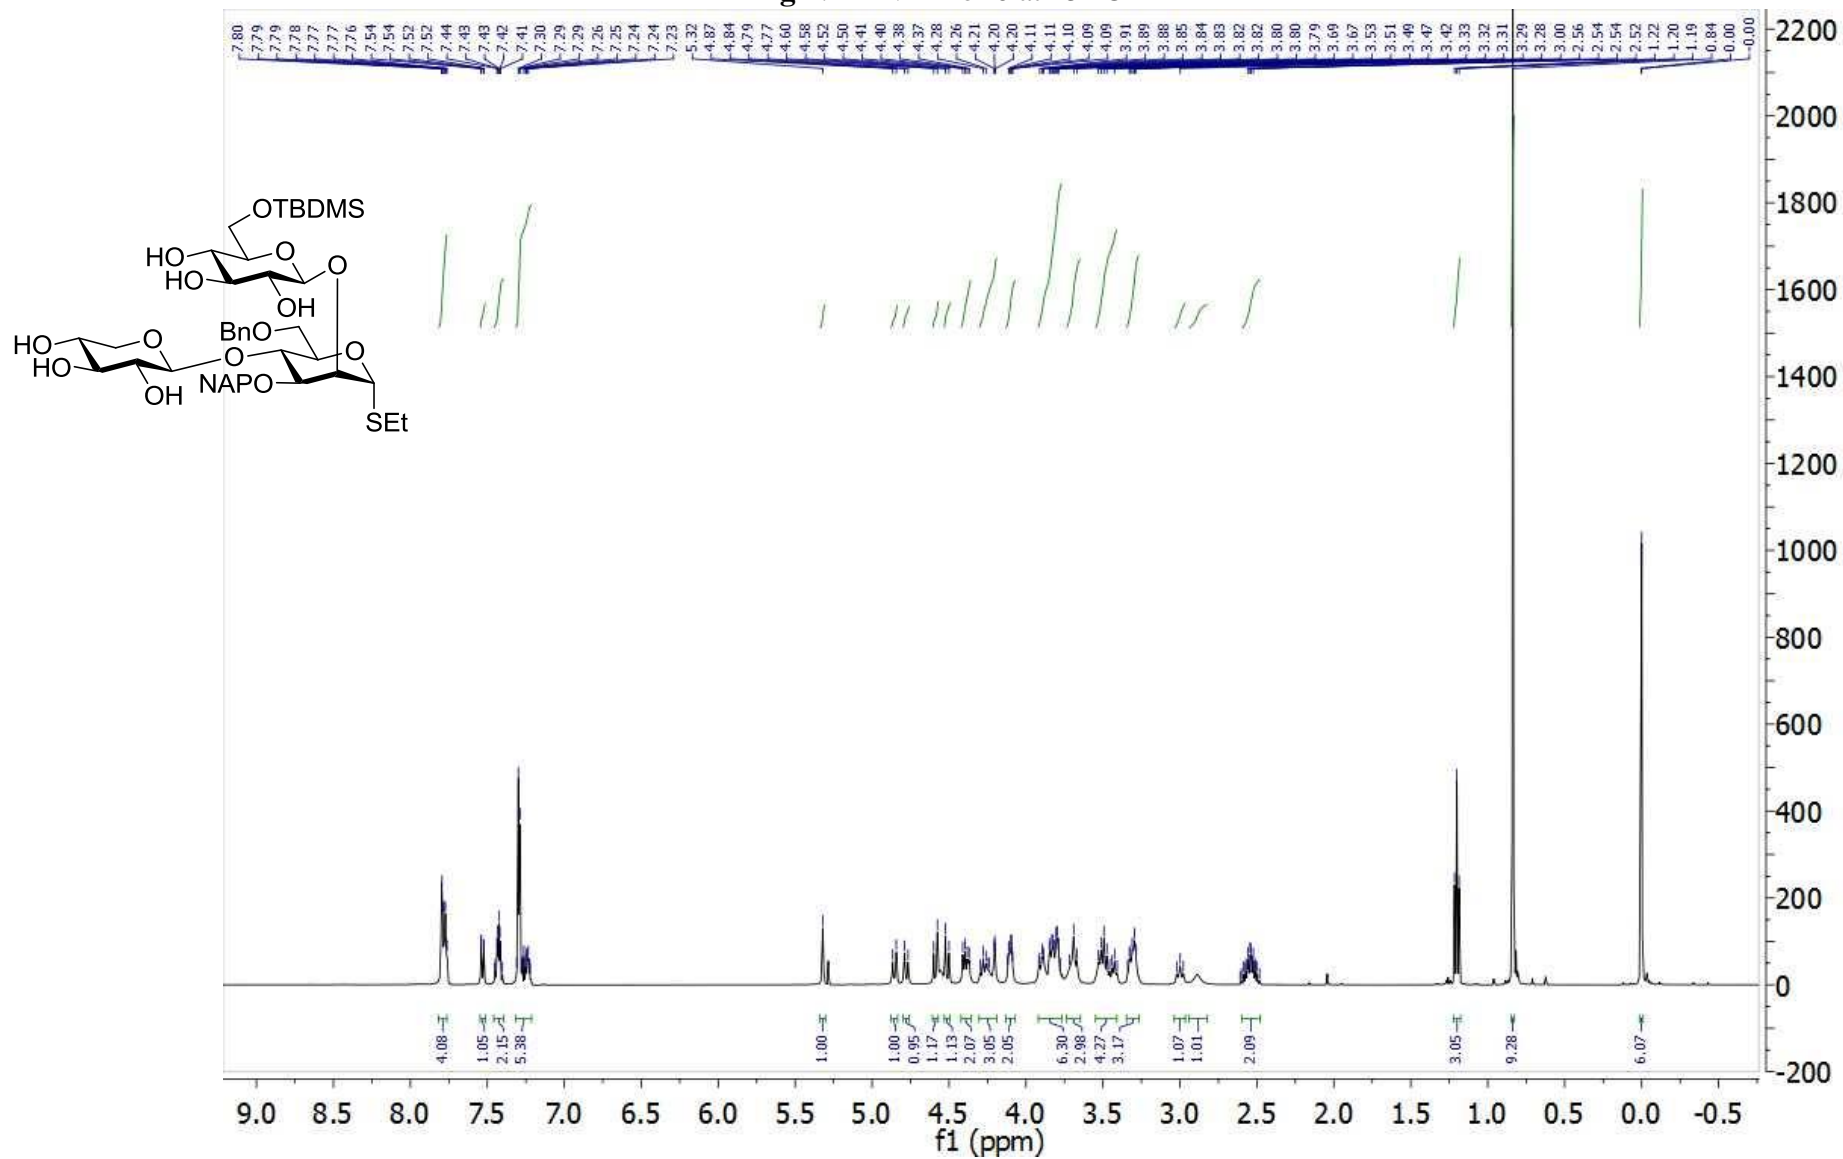

Fig 8:  $^{13}\text{C}$  NMR of 6 at 25 °C

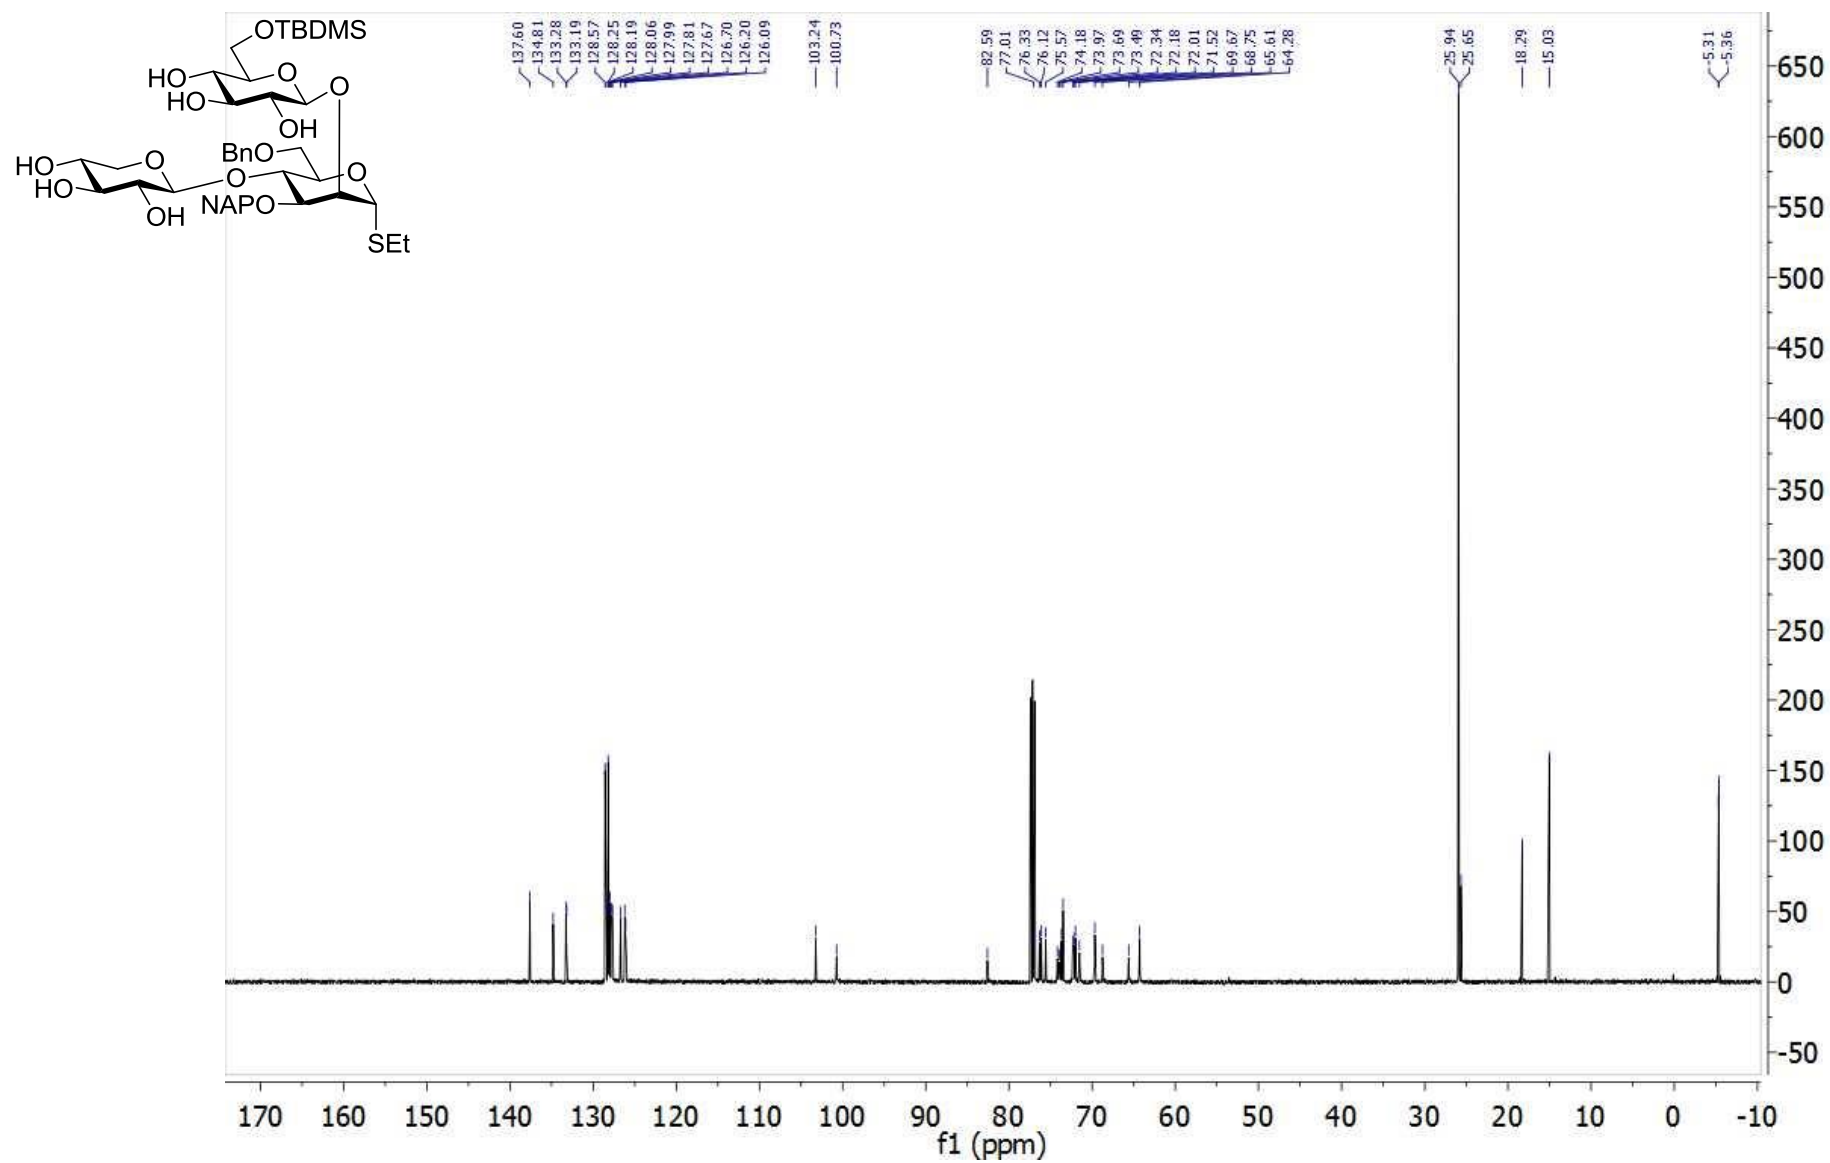

Fig 9:  $^1\text{H}$  NMR of 7 at 25  $^\circ\text{C}$

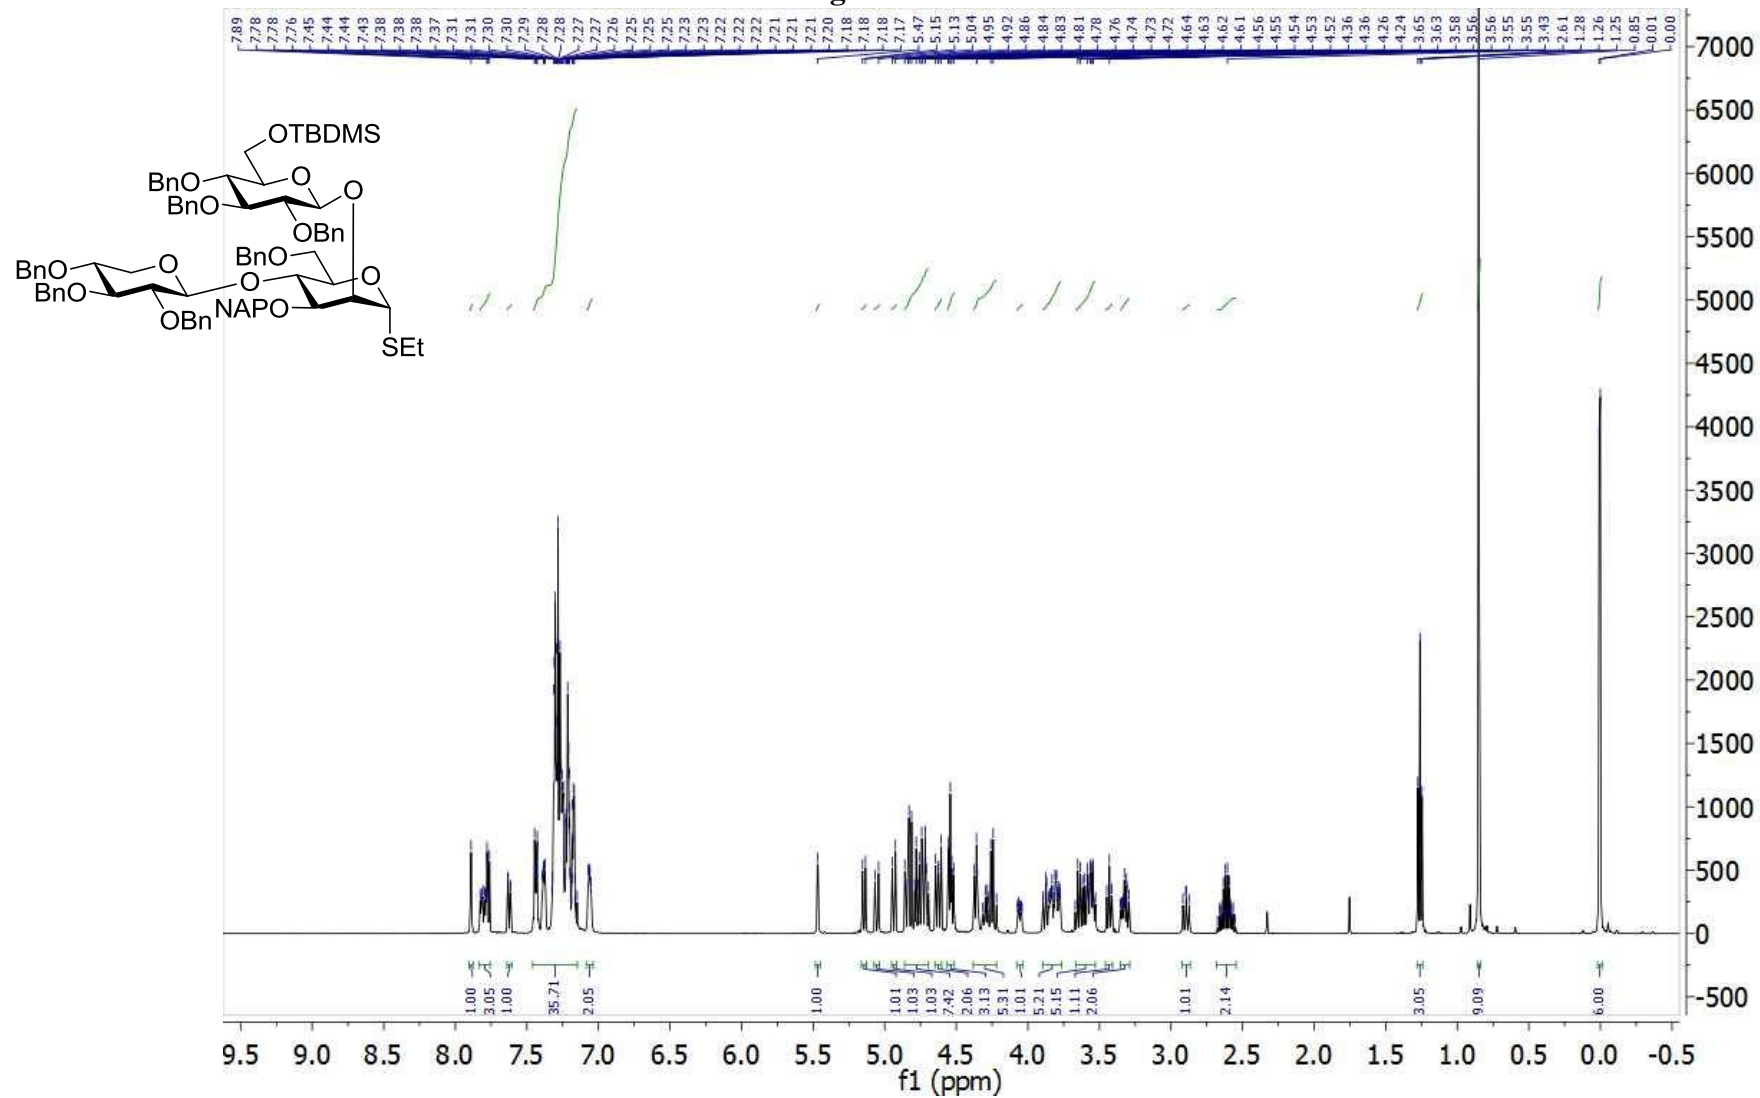

Fig 10:  $^{13}\text{C}$  NMR of 7 at 25 °C

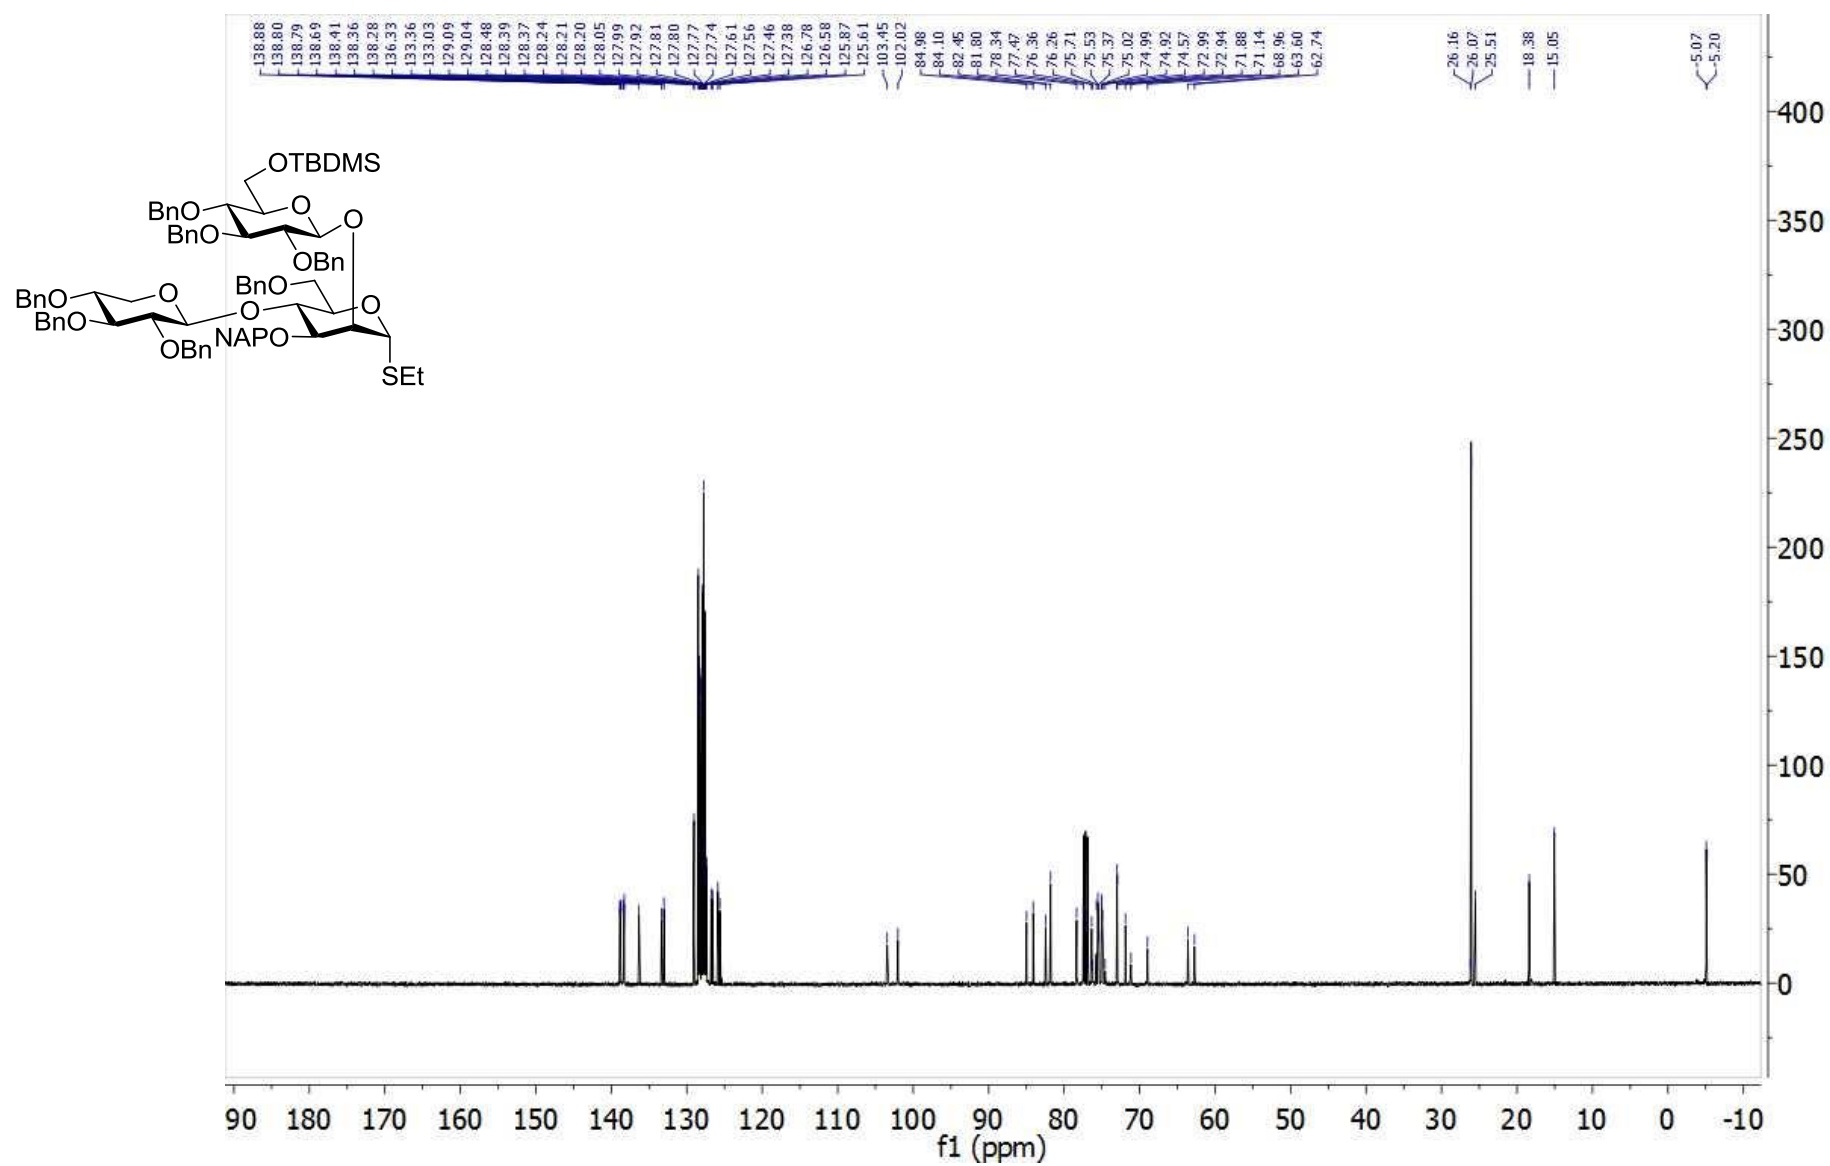



Fig 12:  $^1\text{H}$  NMR of **8** at 50  $^\circ\text{C}$

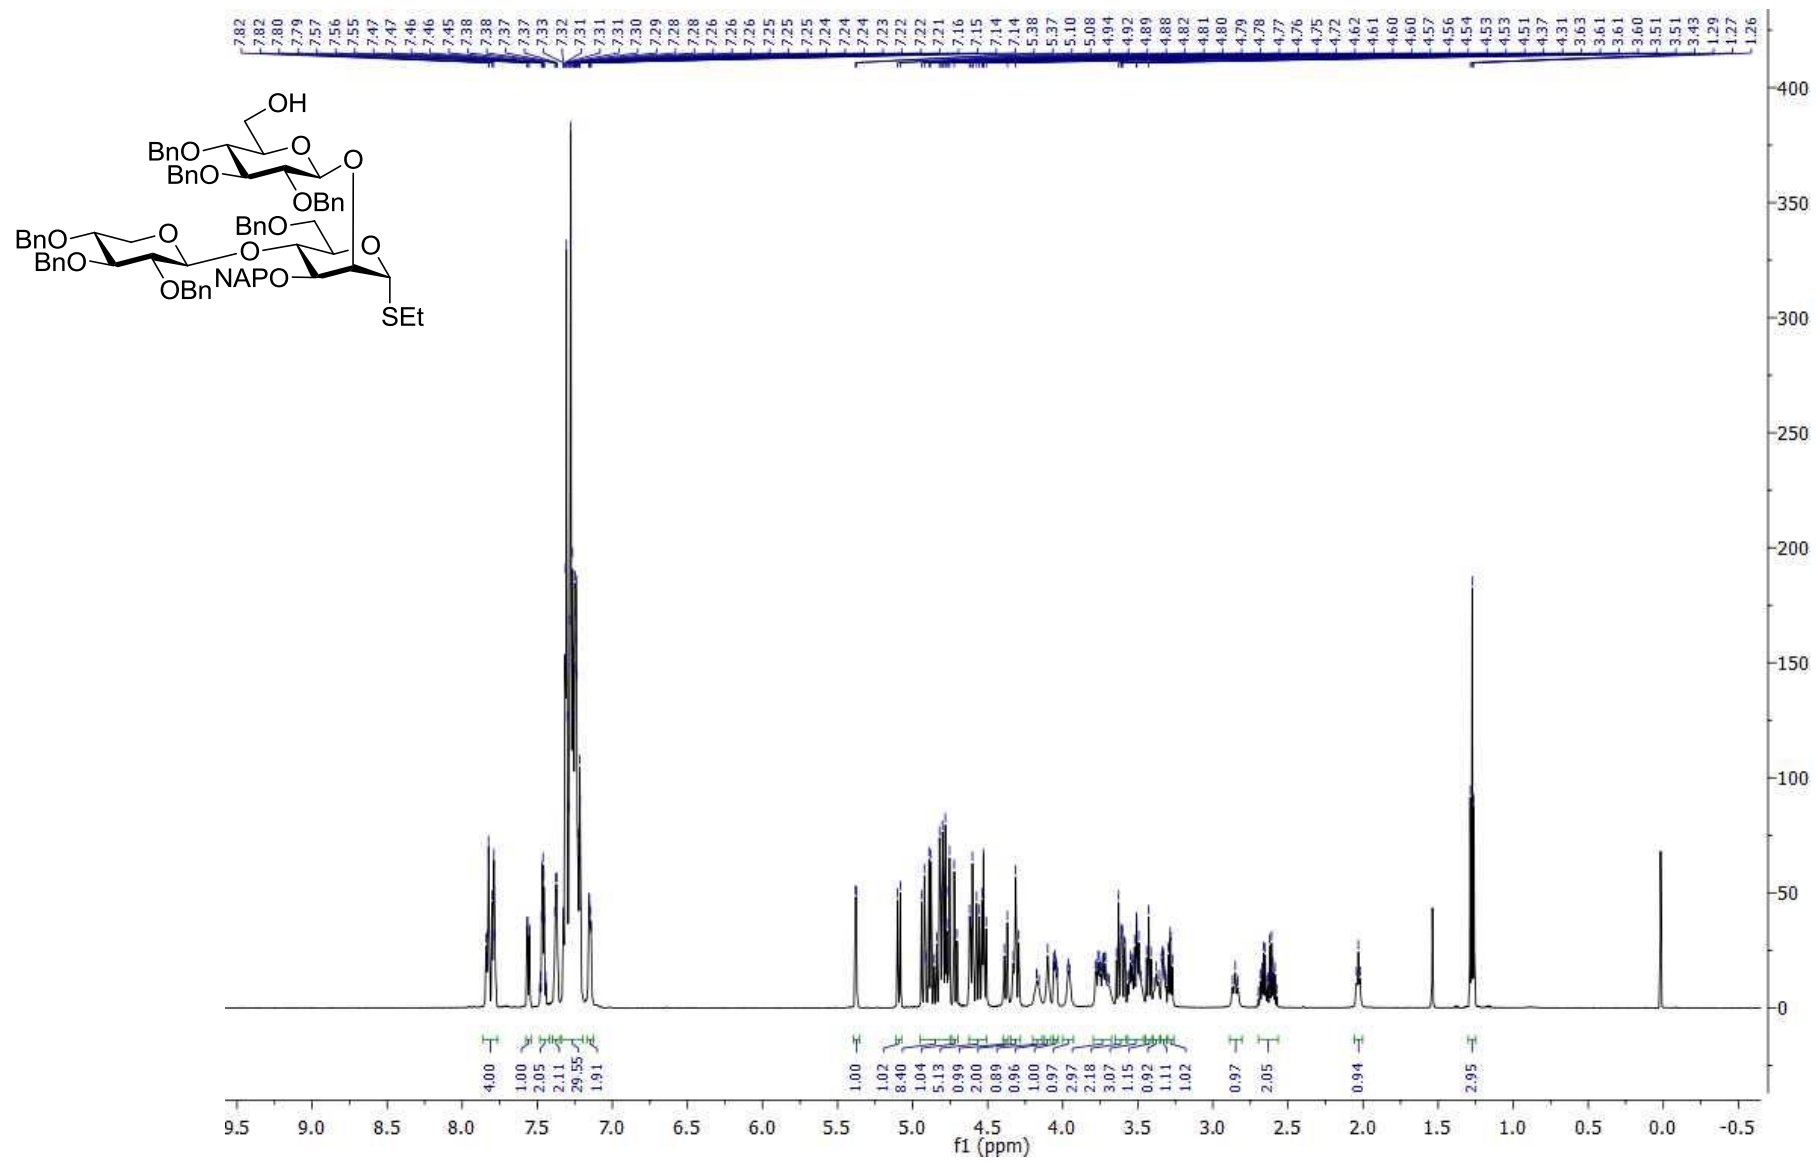

S13

Fig 13:  $^{13}\text{C}$  NMR of **8** at 25 °C

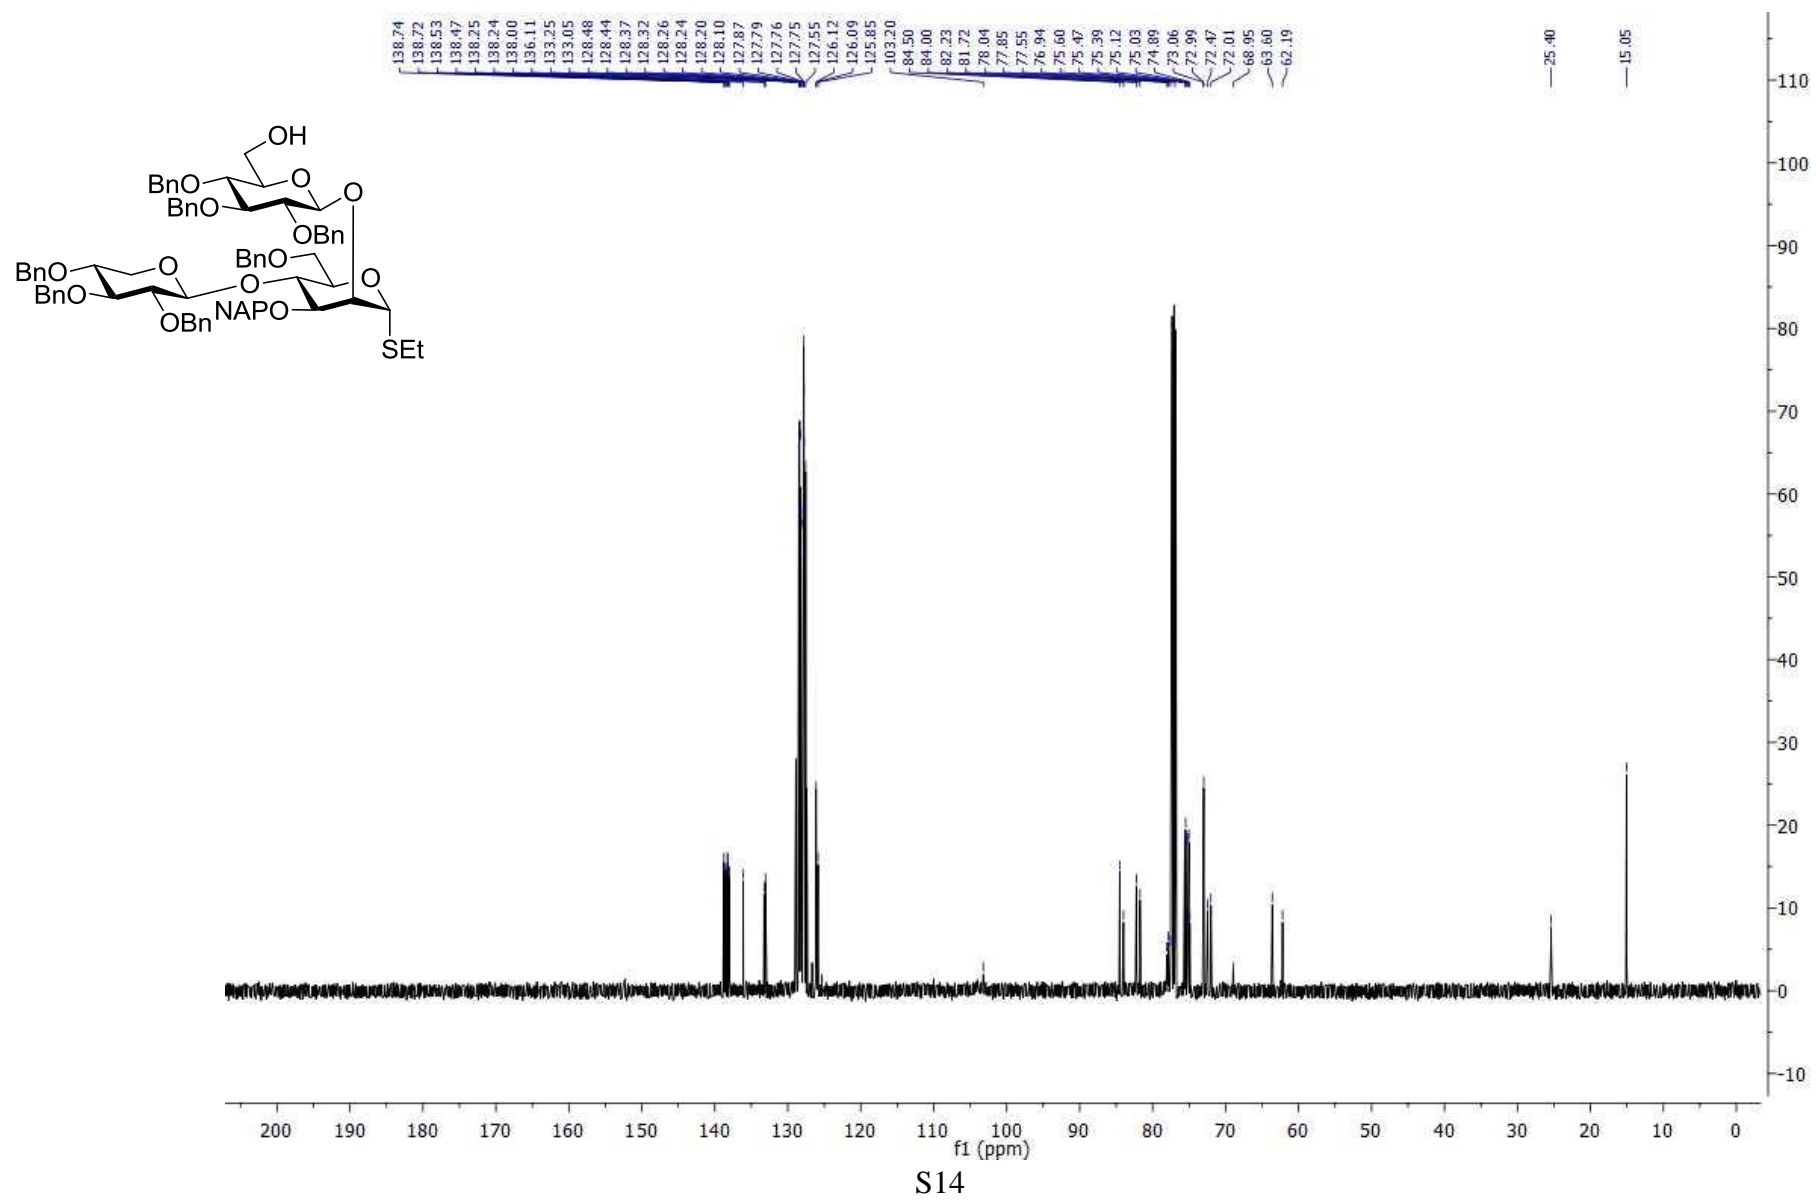

Fig 14:  $^{13}\text{C}$  NMR of **8** at 50 °C

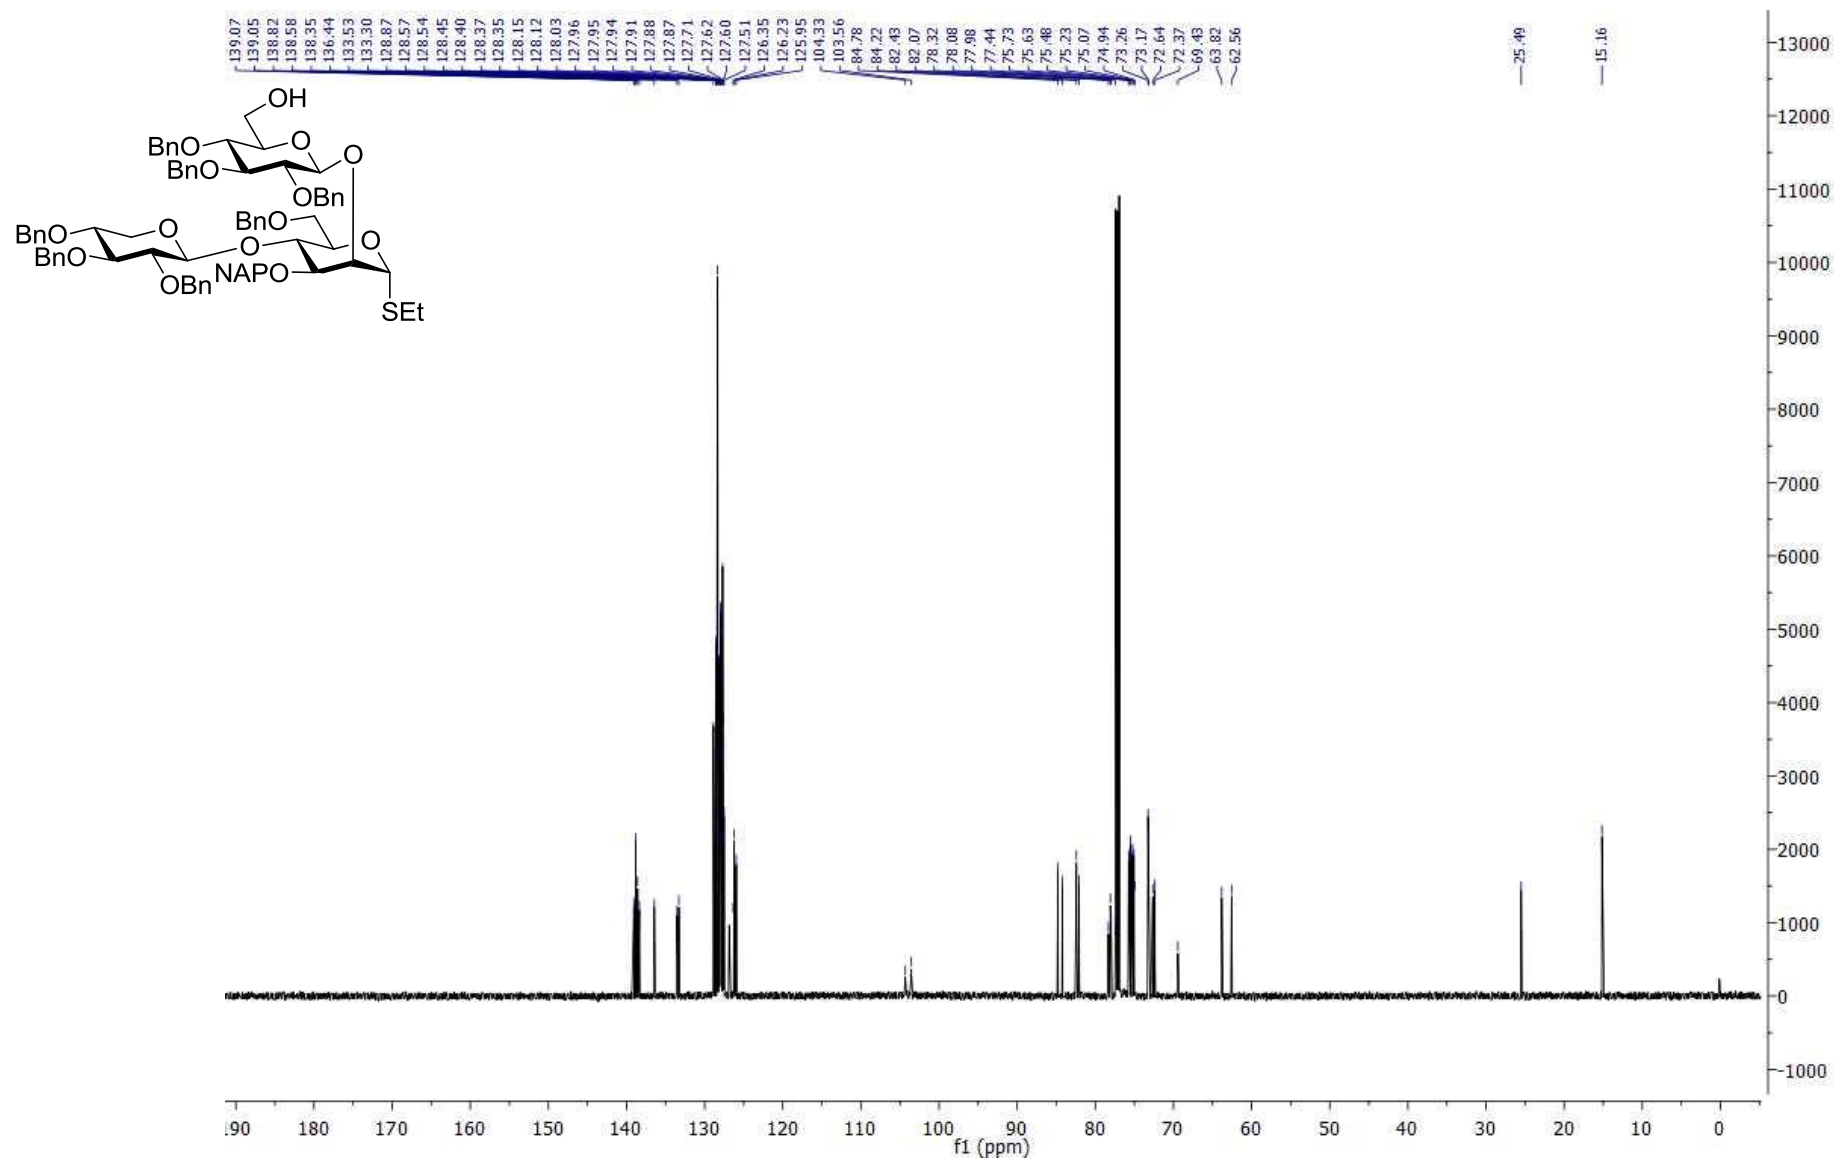



Fig 15:  $^1\text{H}$ - $^{13}\text{C}$  HSQC NMR of **8** at 25 °C

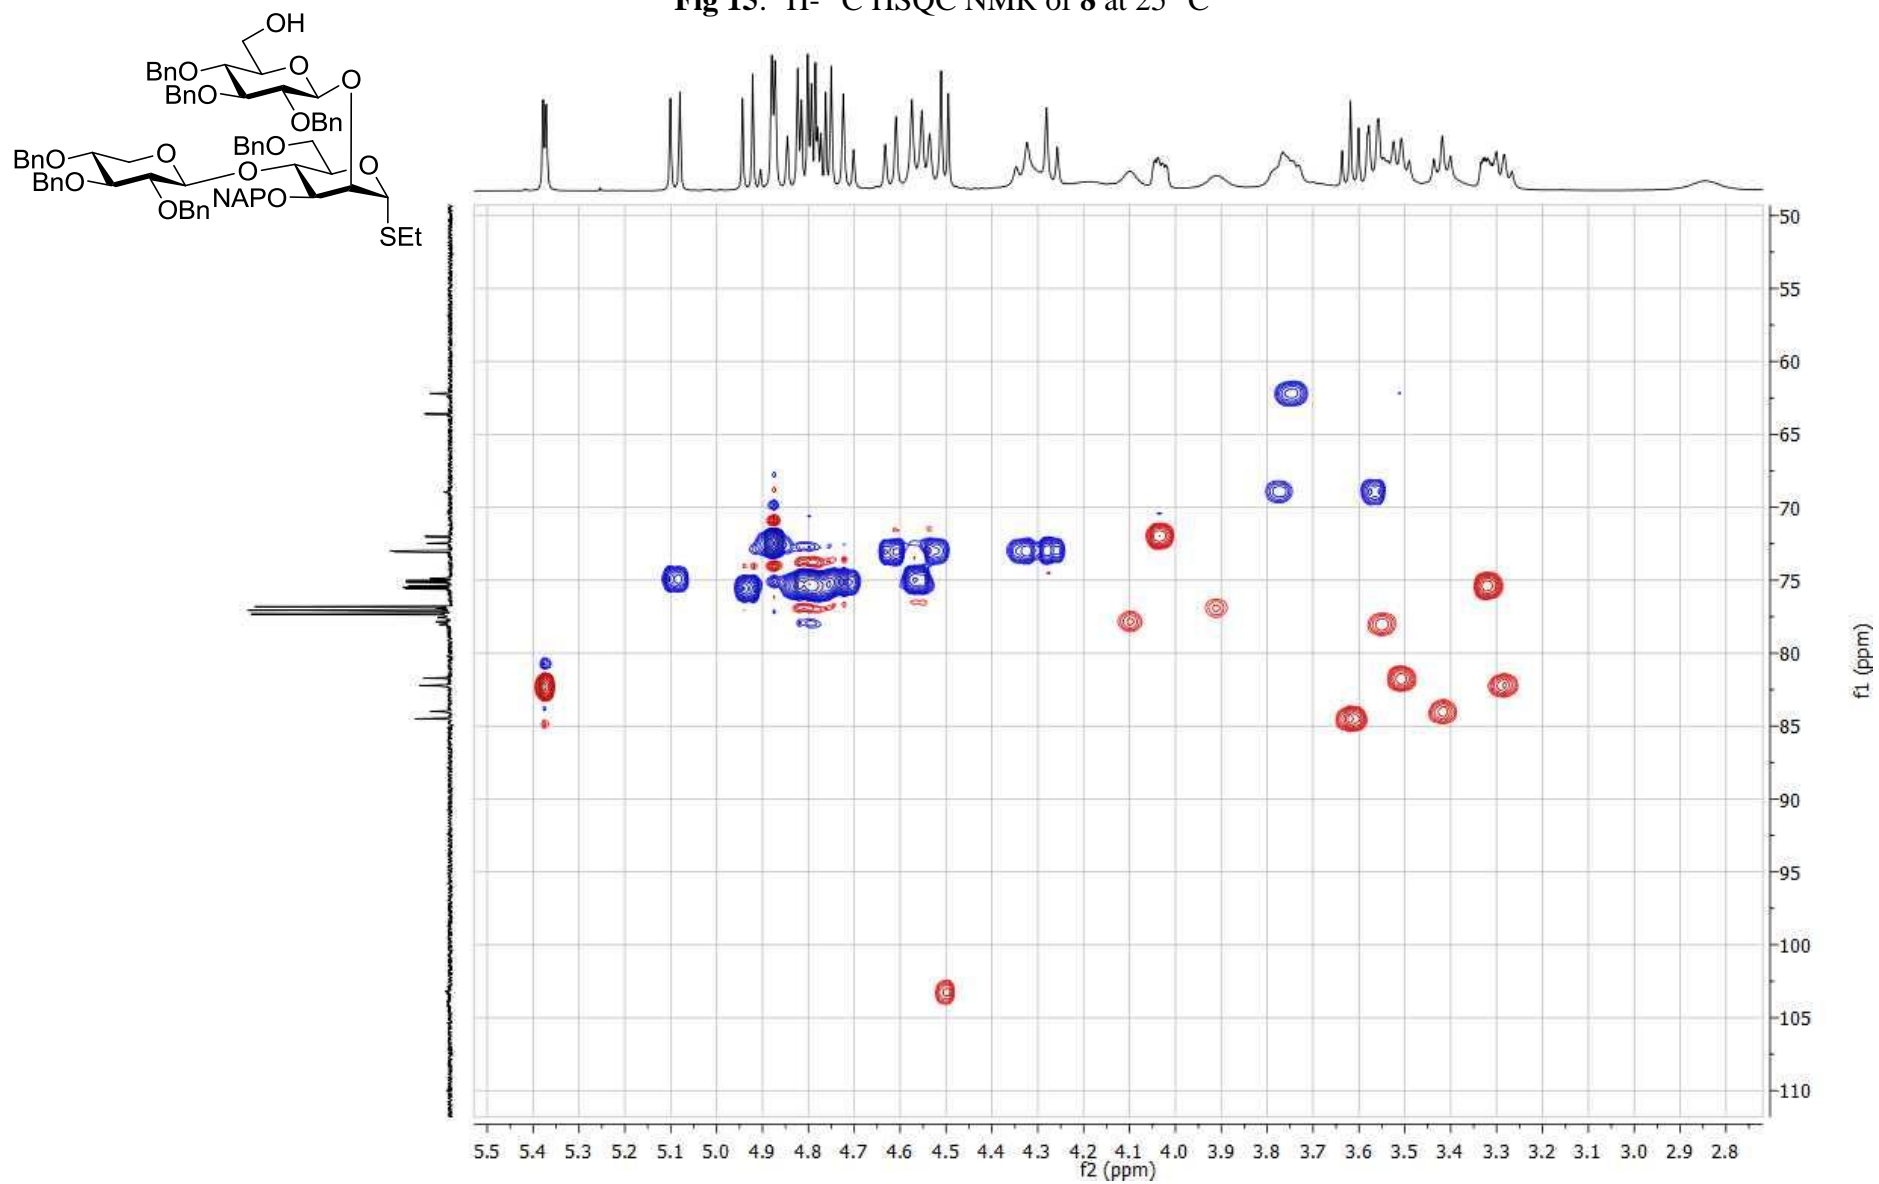

Fig 16:  $^1\text{H}$ - $^{13}\text{C}$  HSQC NMR of **8** at 50 °C

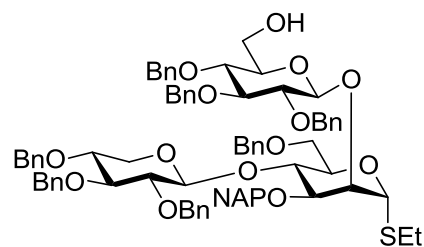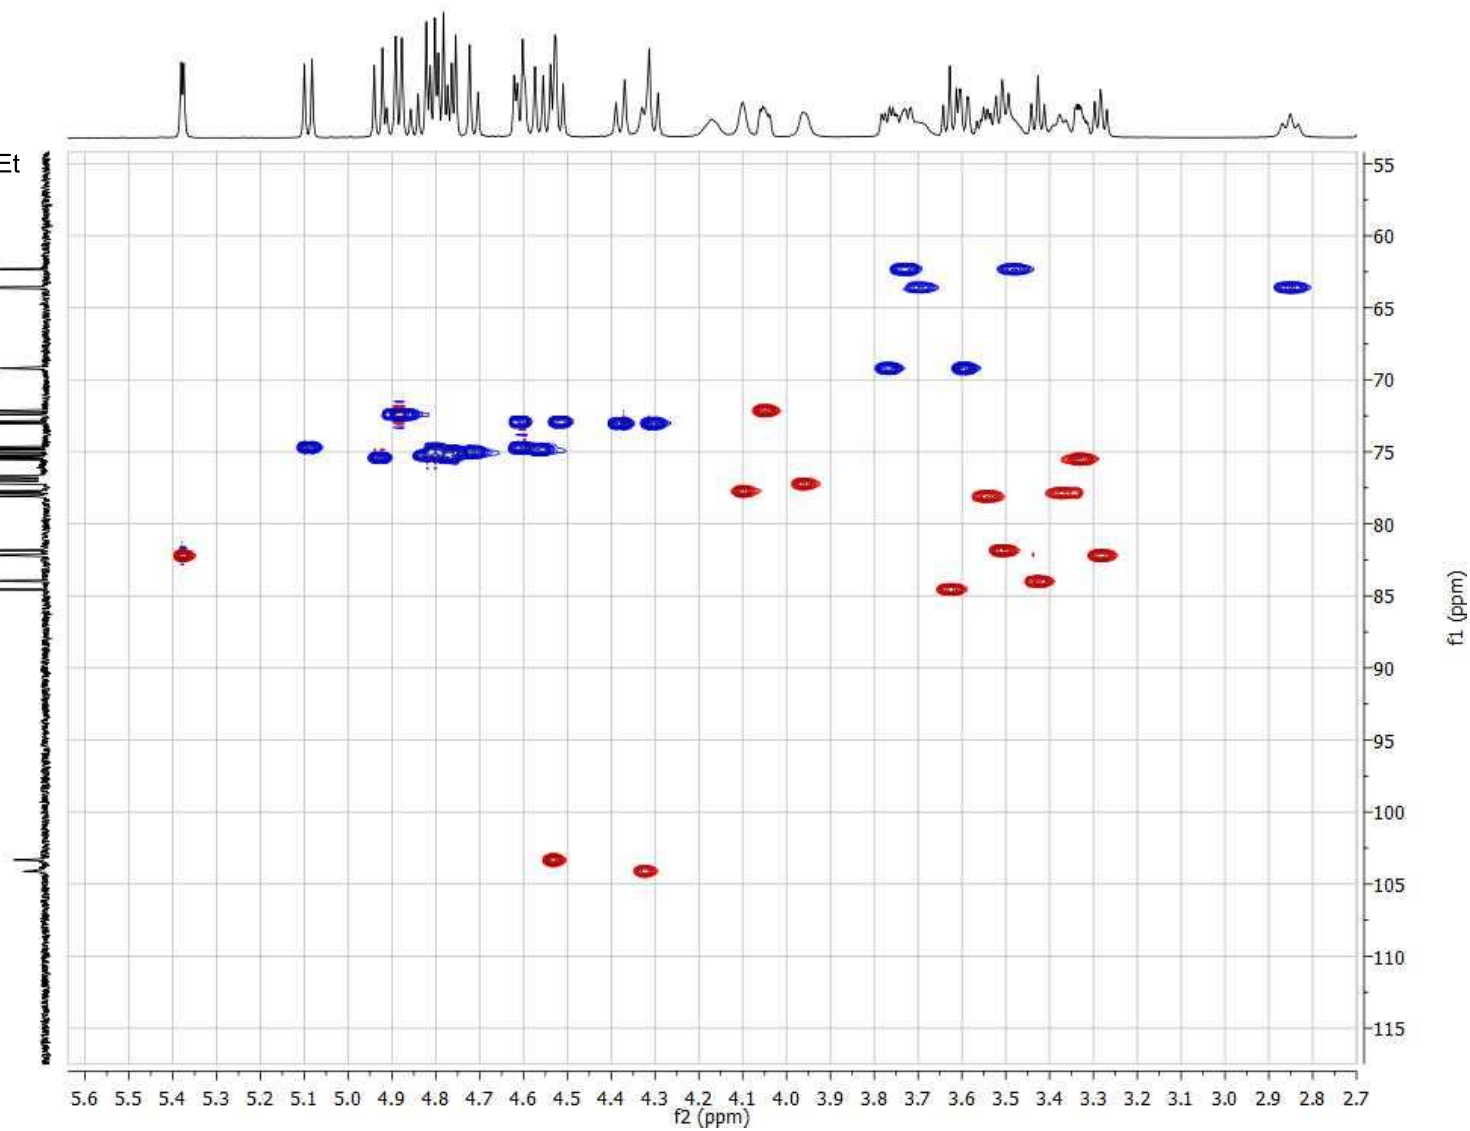

Fig 17: <sup>1</sup>H NMR of **9** at 25 °C

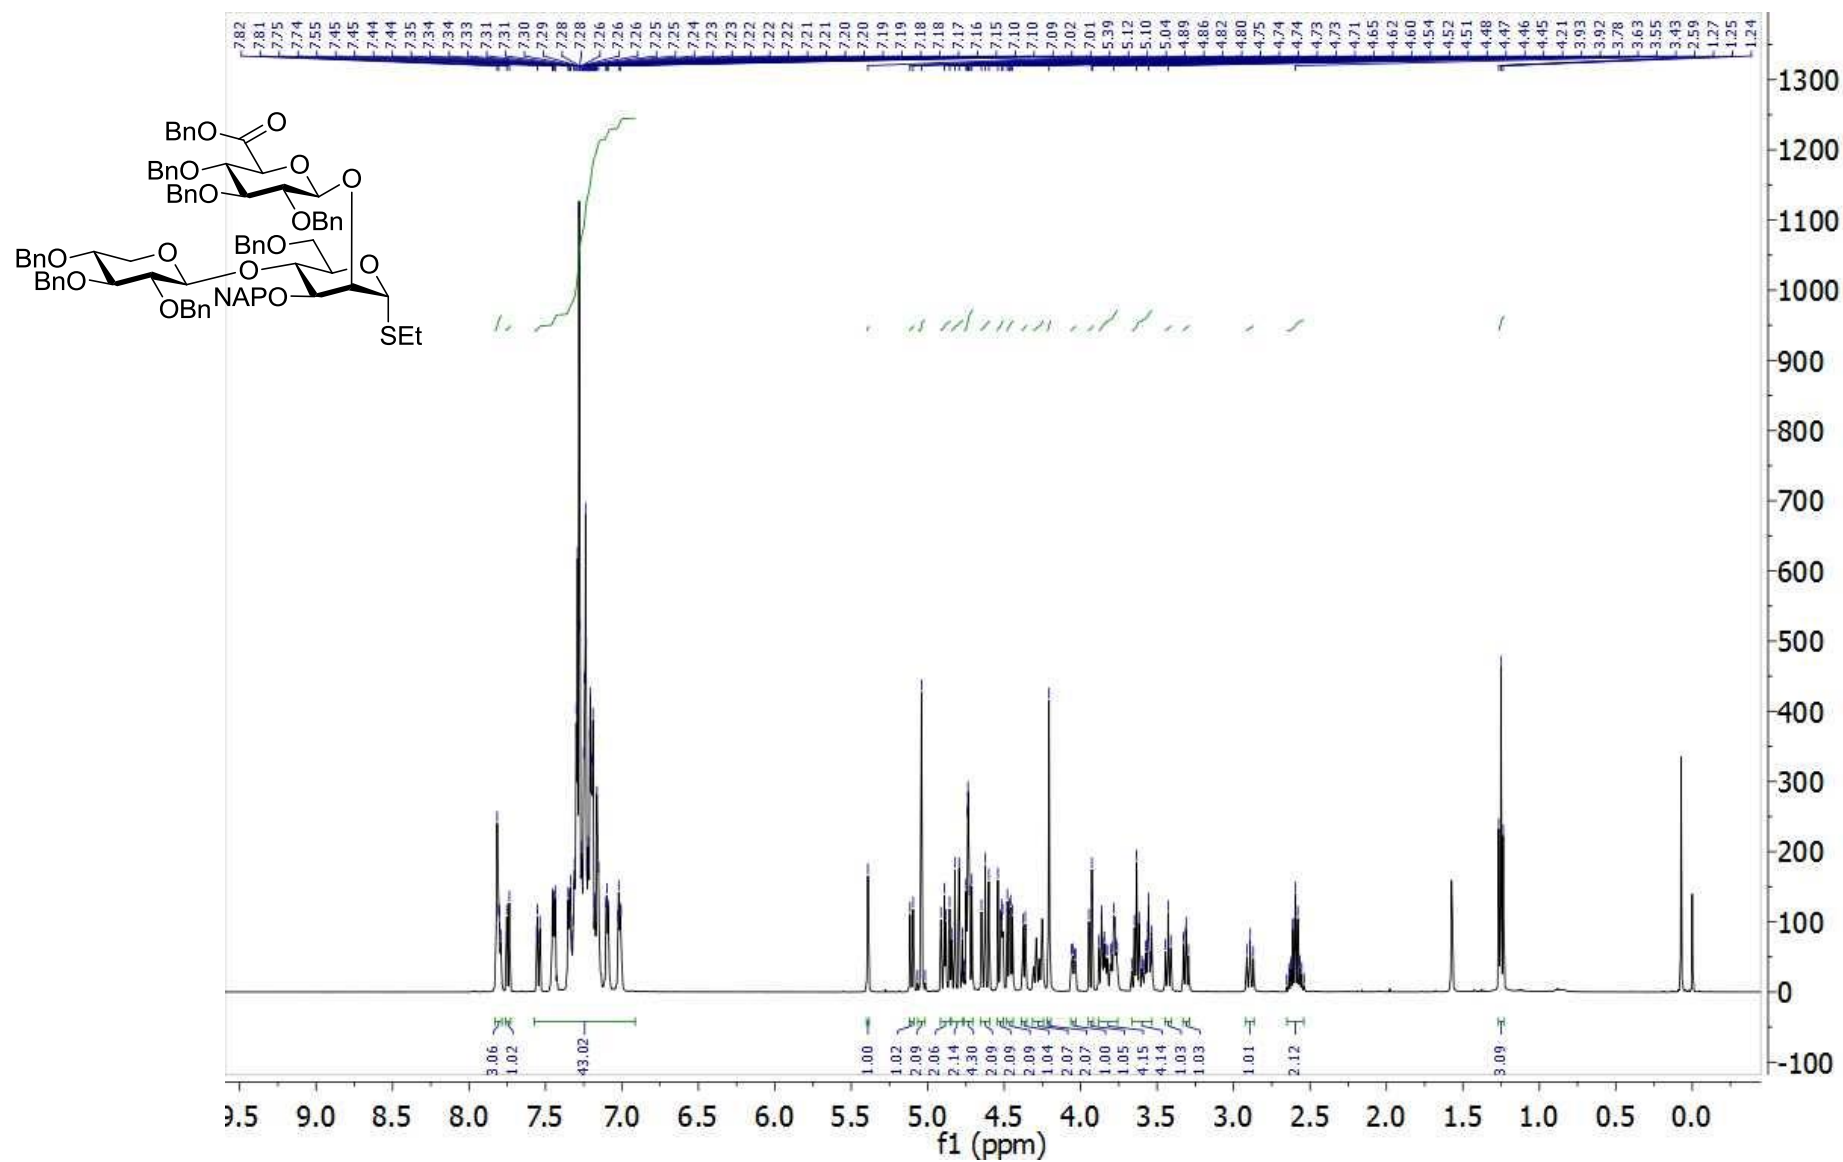

Fig 18:  $^{13}\text{C}$  NMR of **9** at 25 °C

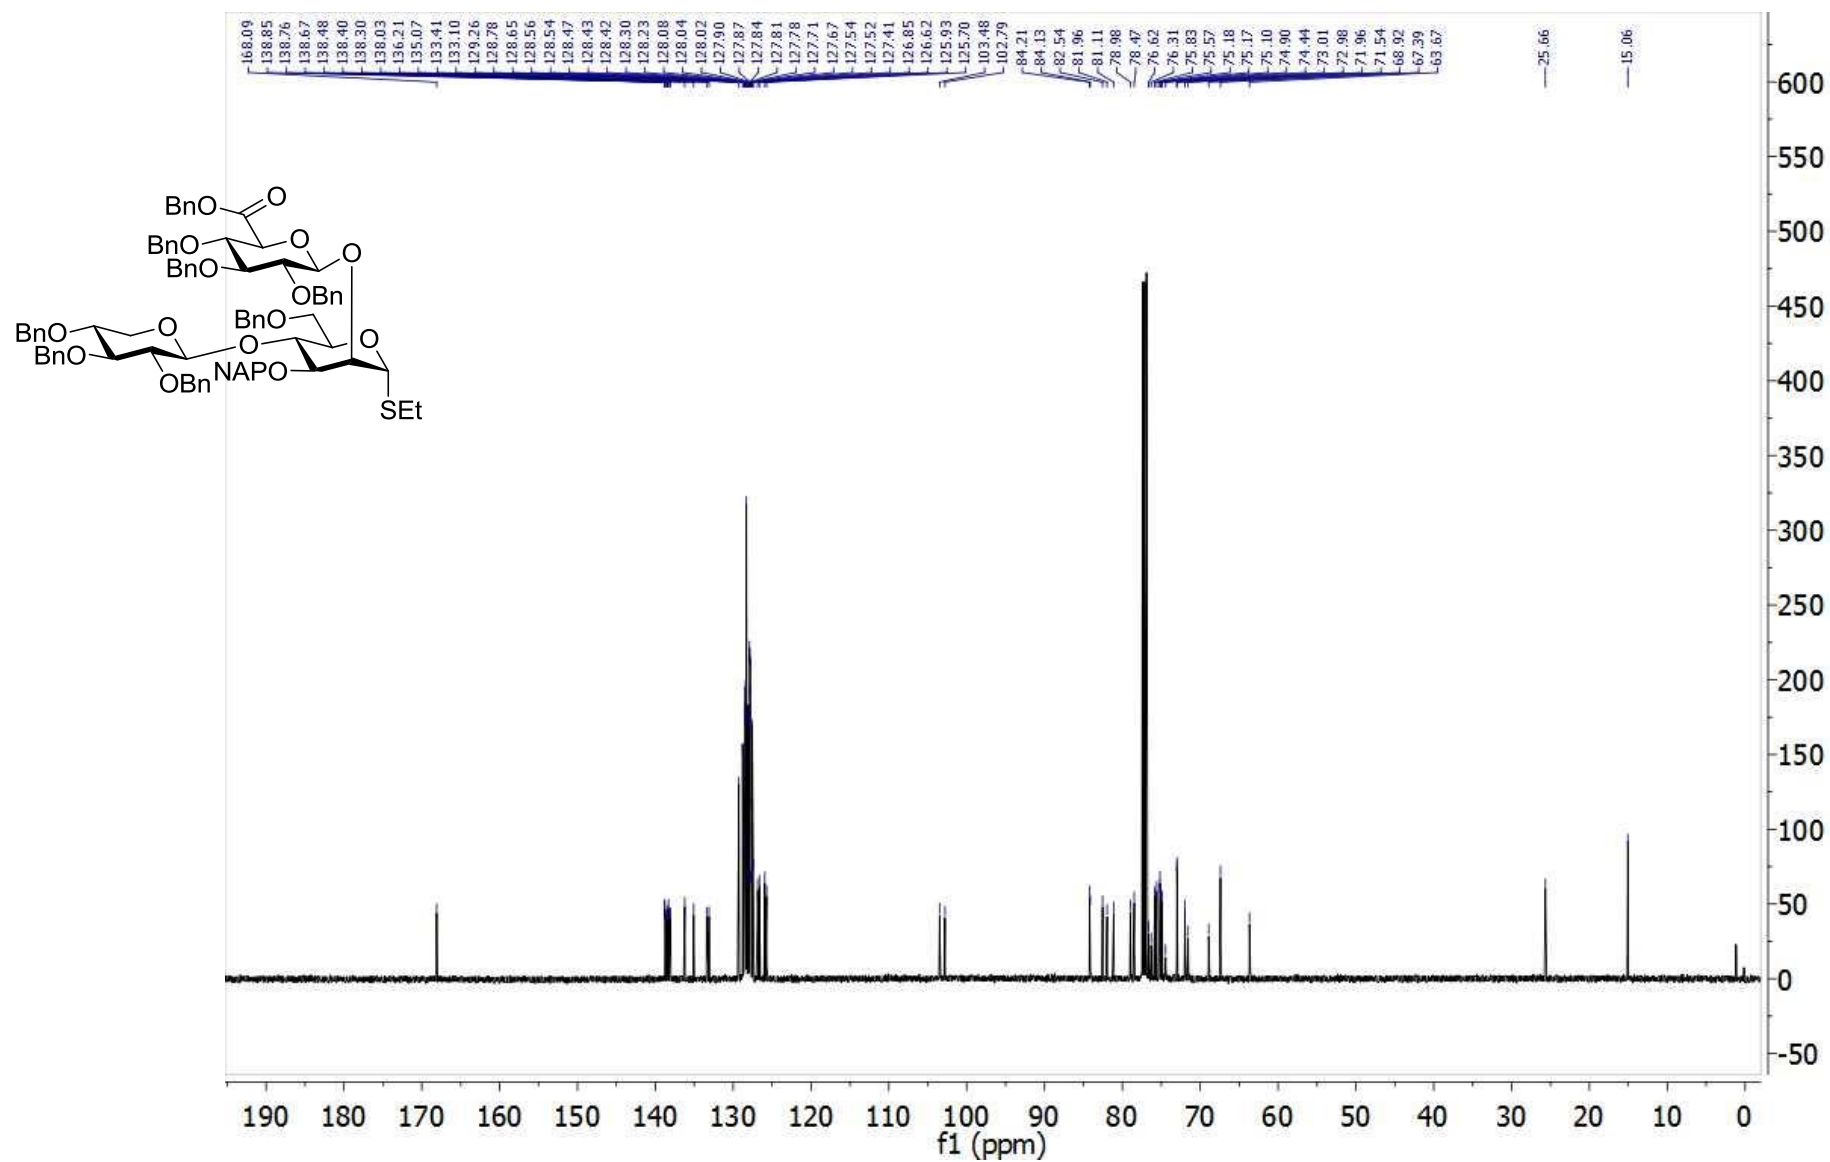

Fig 19: <sup>1</sup>H NMR of 11 at 25 °C

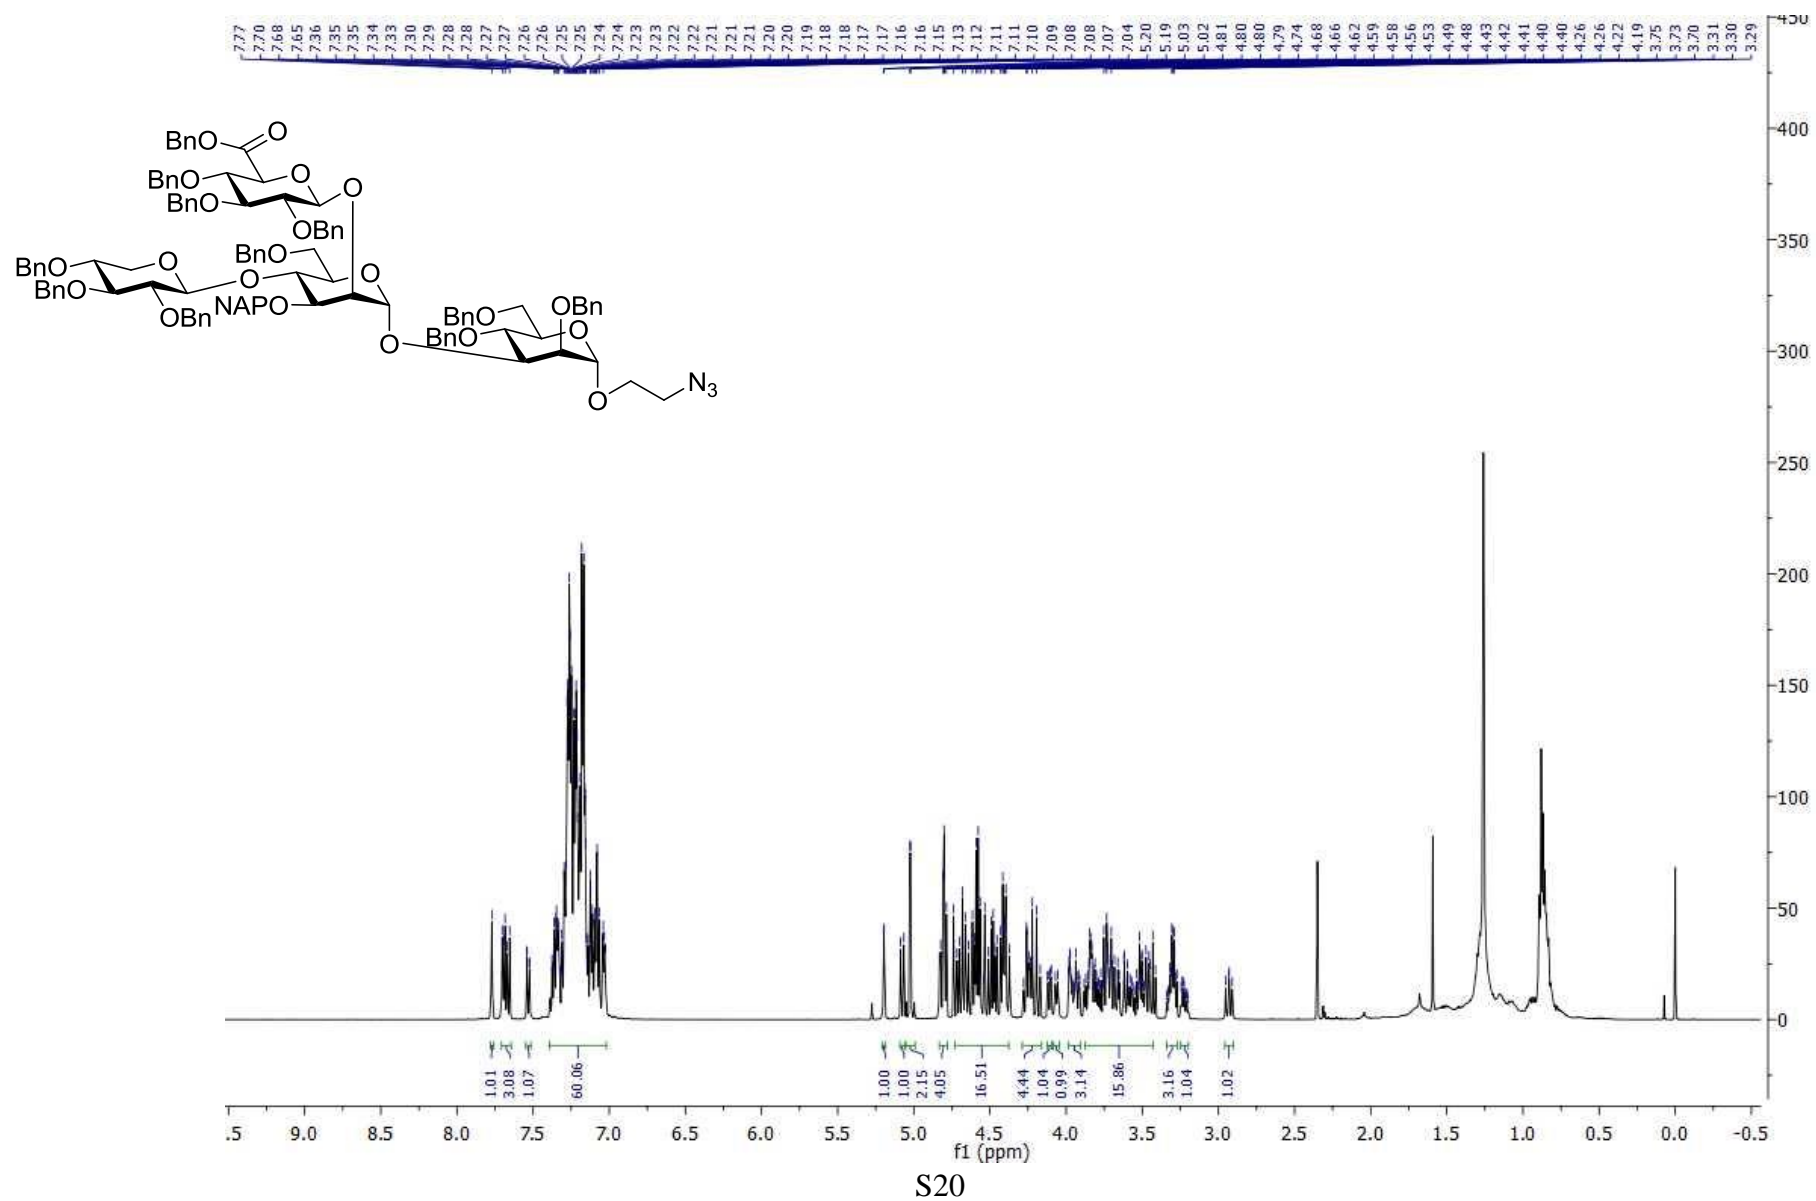

Fig 20:  $^{13}\text{C}$  NMR of 11 at 25 °C

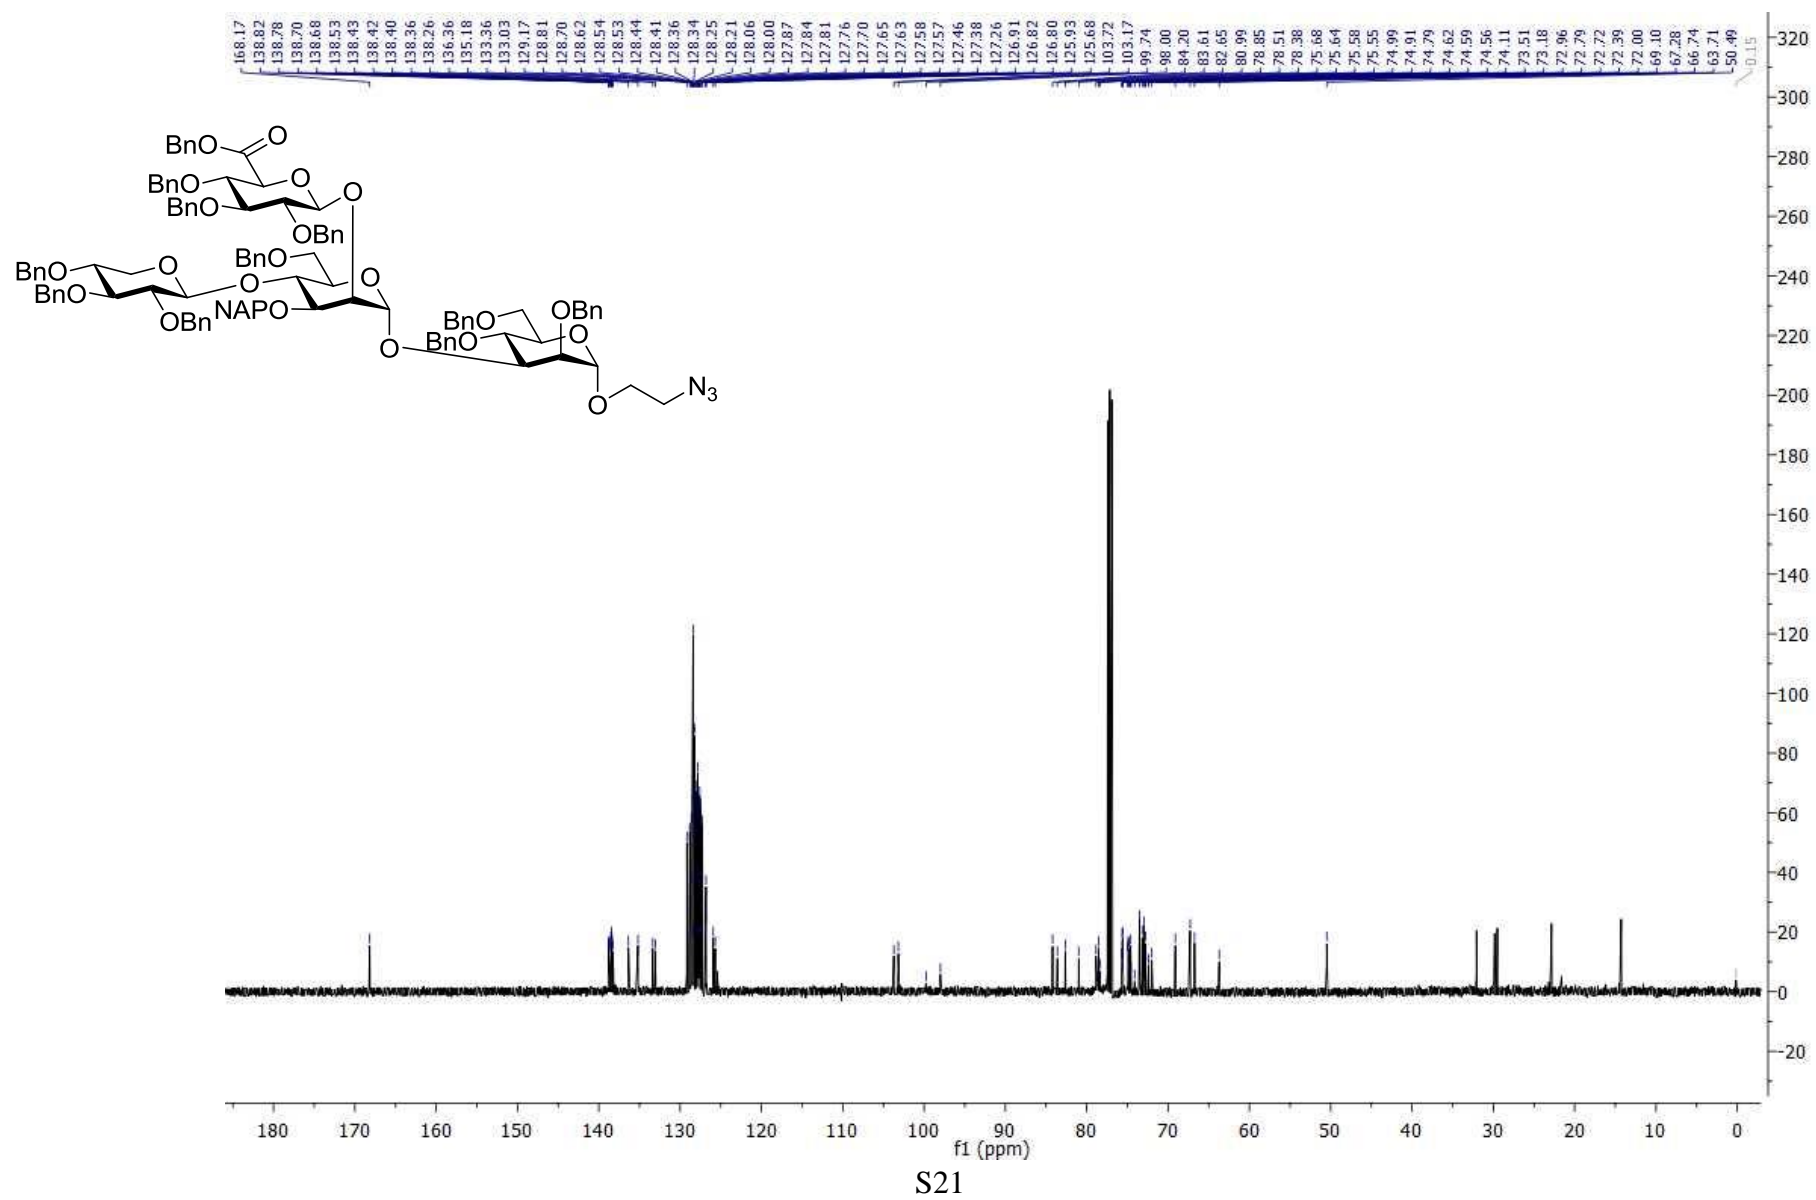

Fig 21: <sup>1</sup>H NMR of 12 at 25 °C

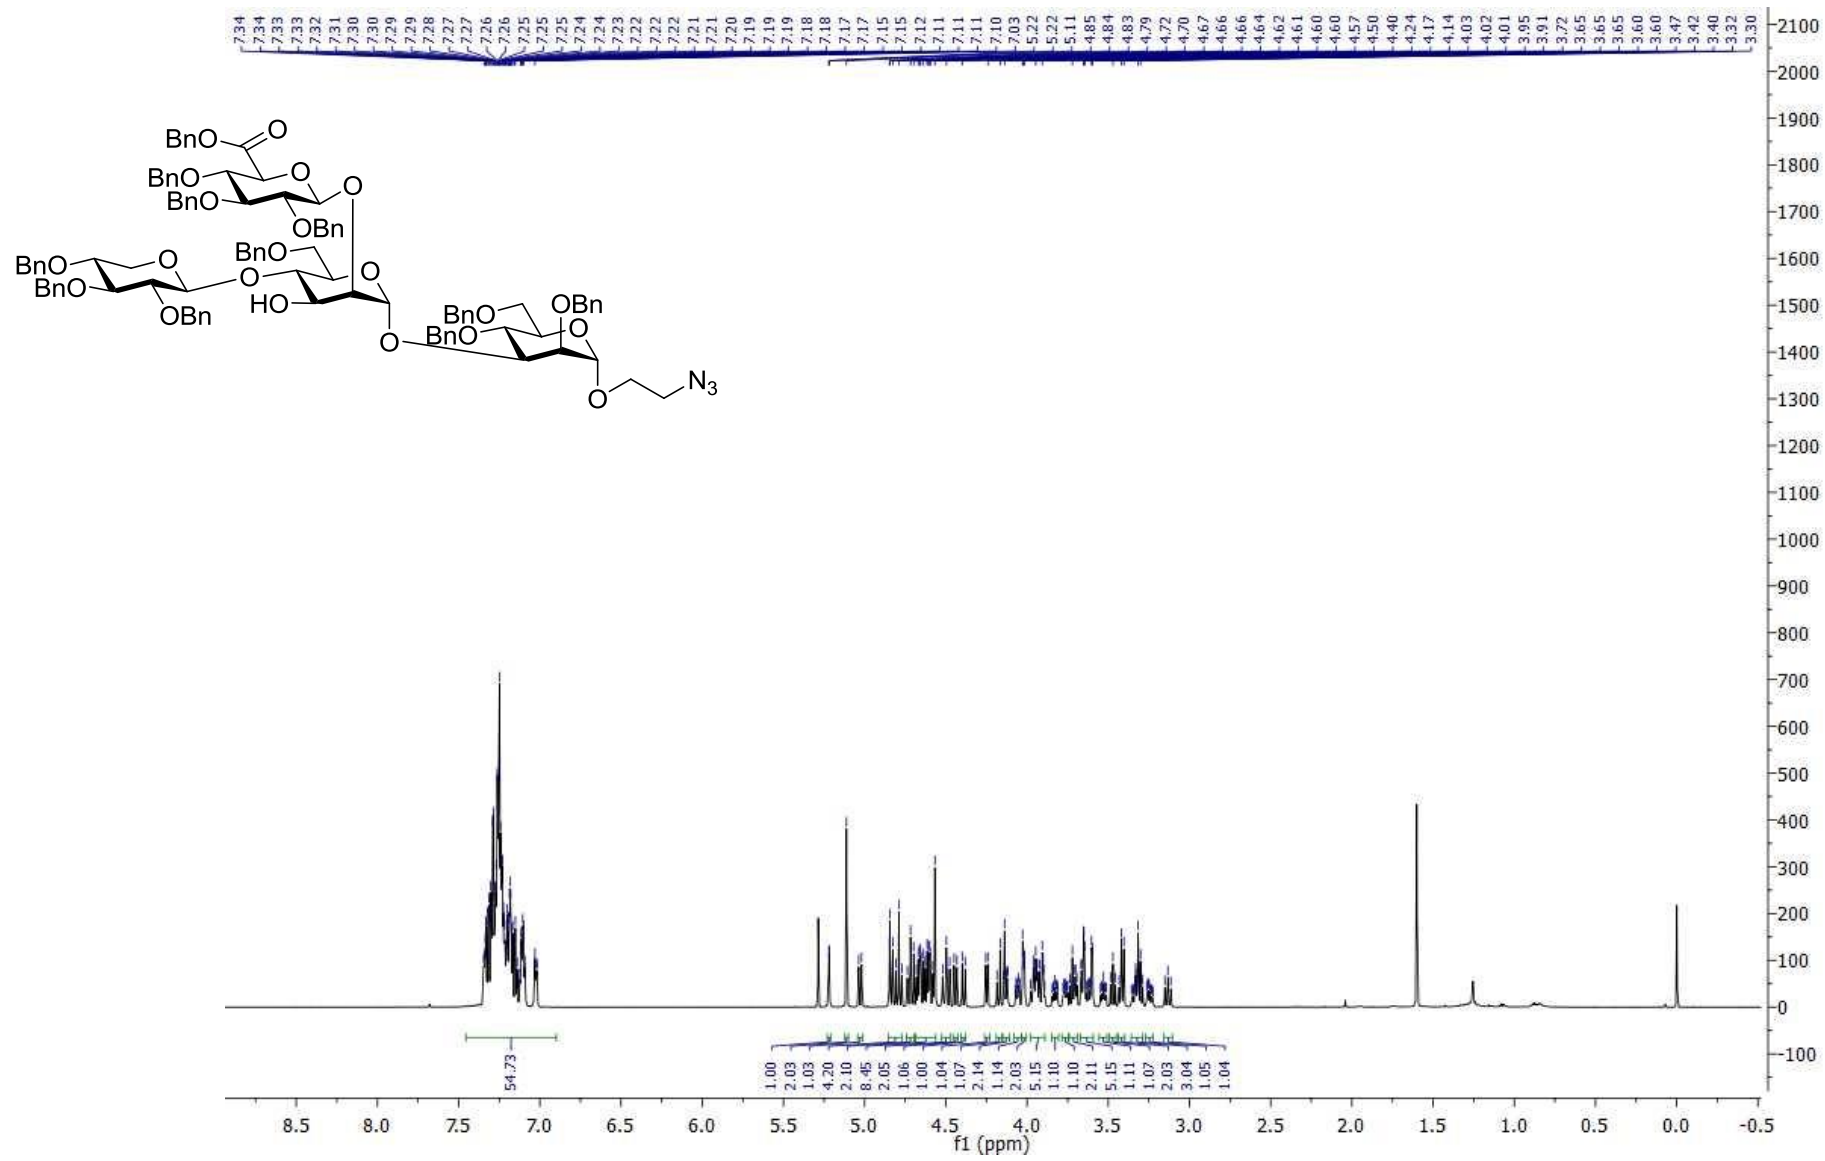

Fig 22:  $^{13}\text{C}$  NMR of **12** at 25 °C

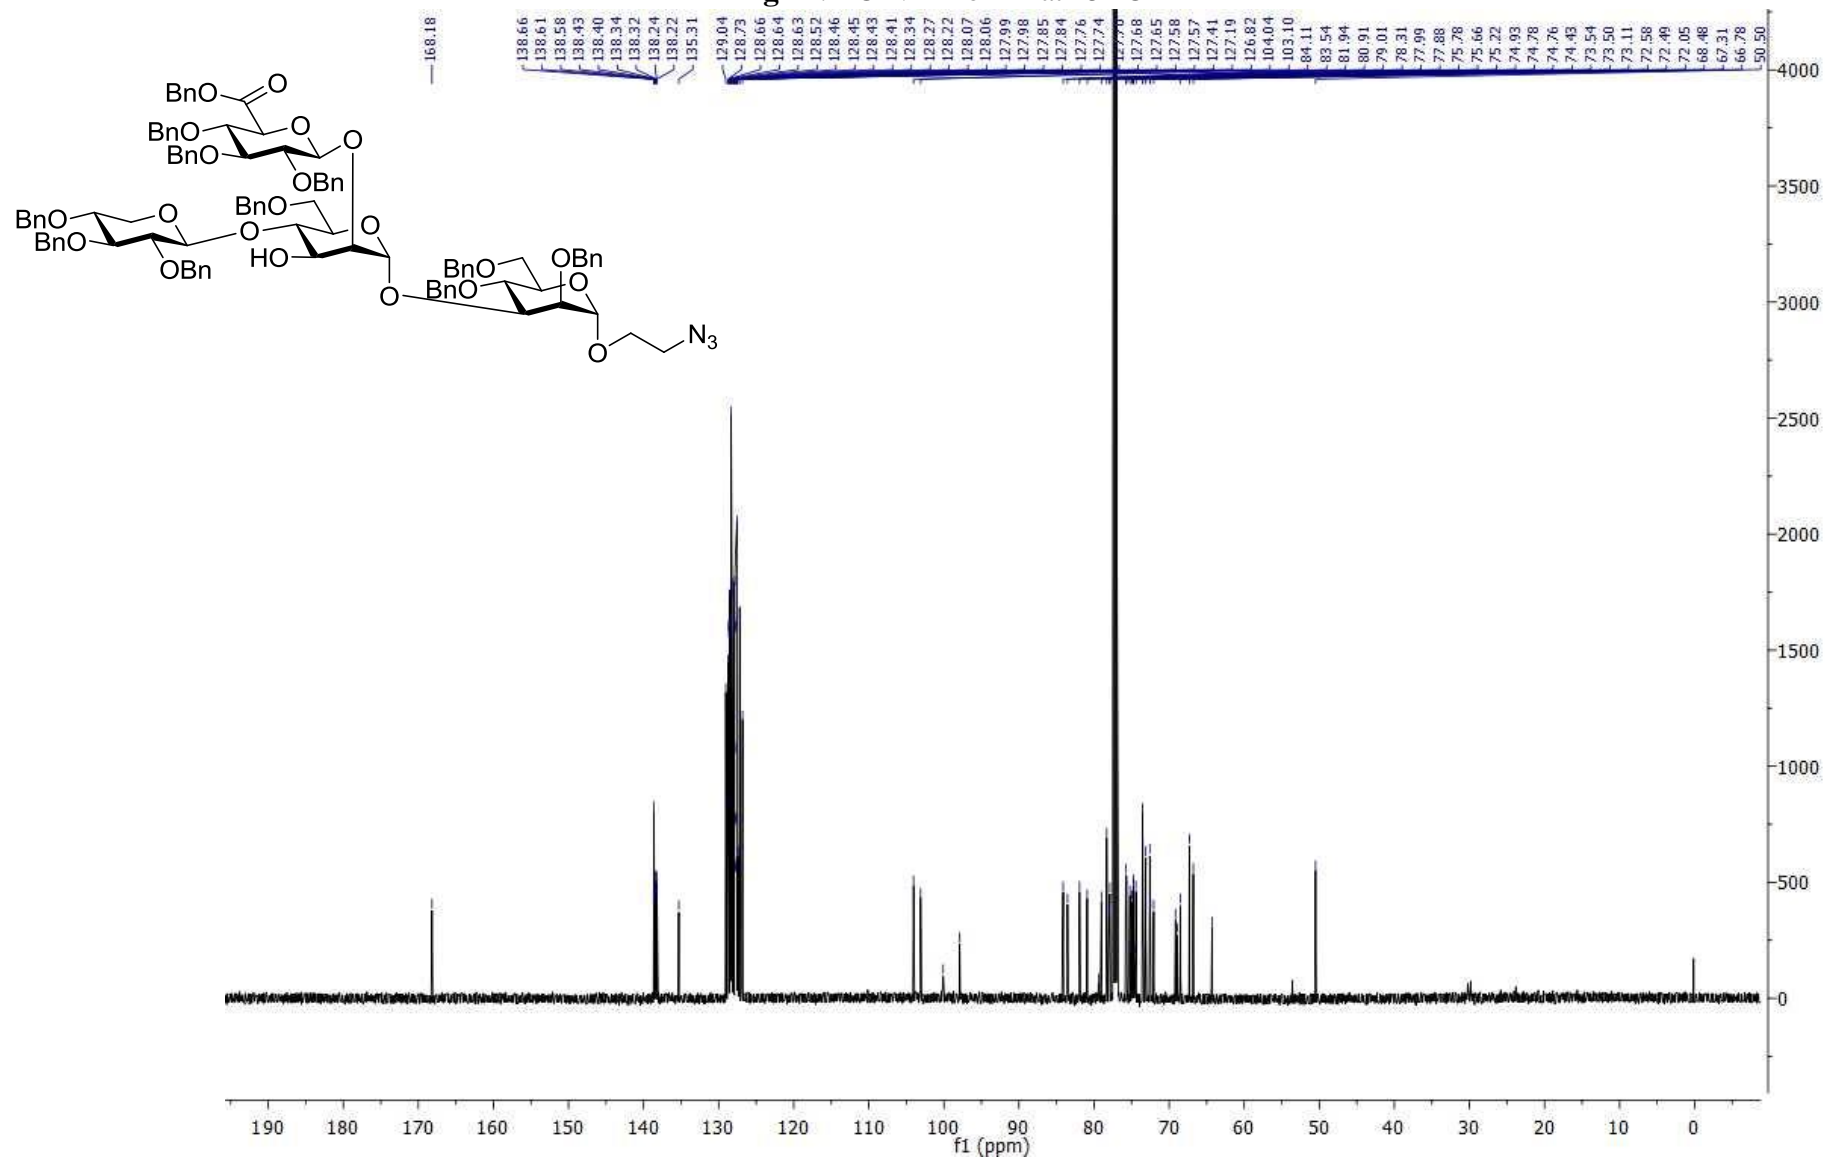



Fig 23:  $^1\text{H}$  NMR of **14** at 25  $^\circ\text{C}$

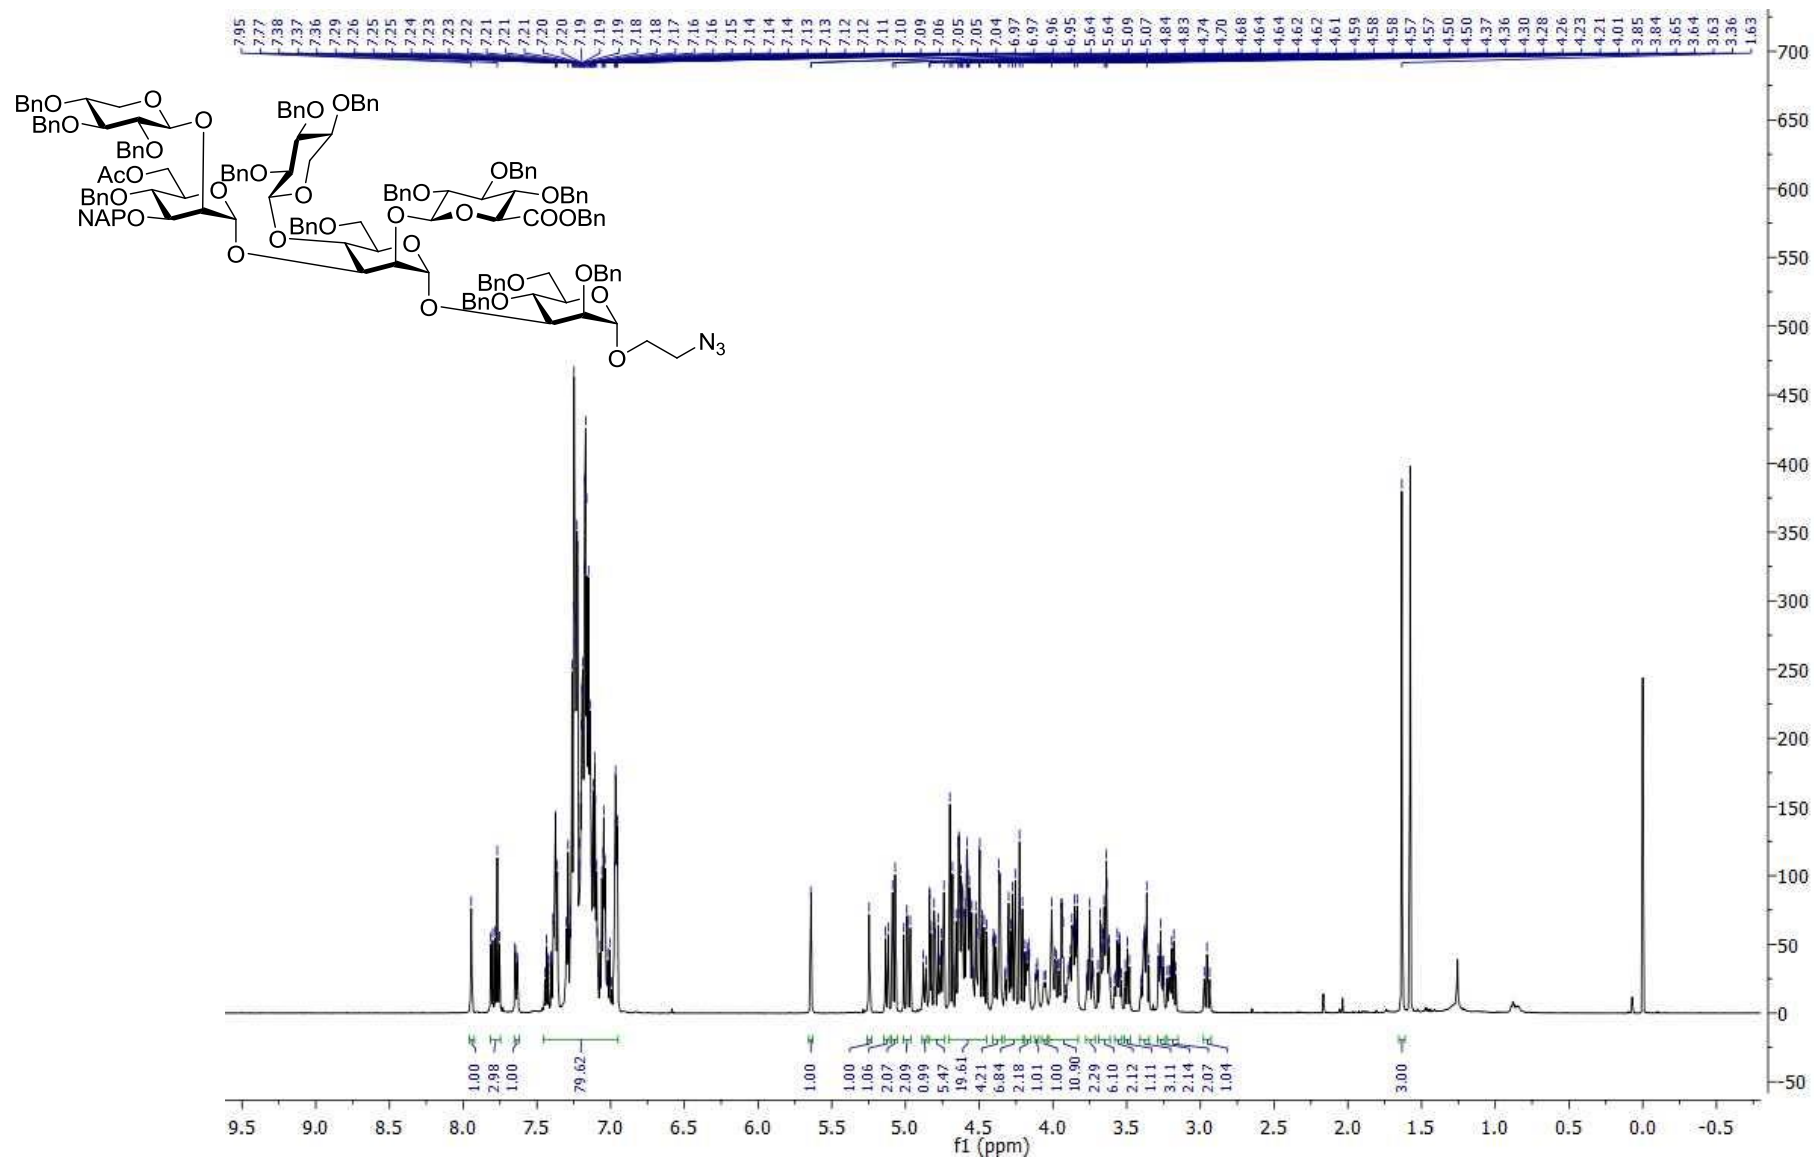

Fig 24:  $^{13}\text{C}$  NMR of **14** at 25 °C

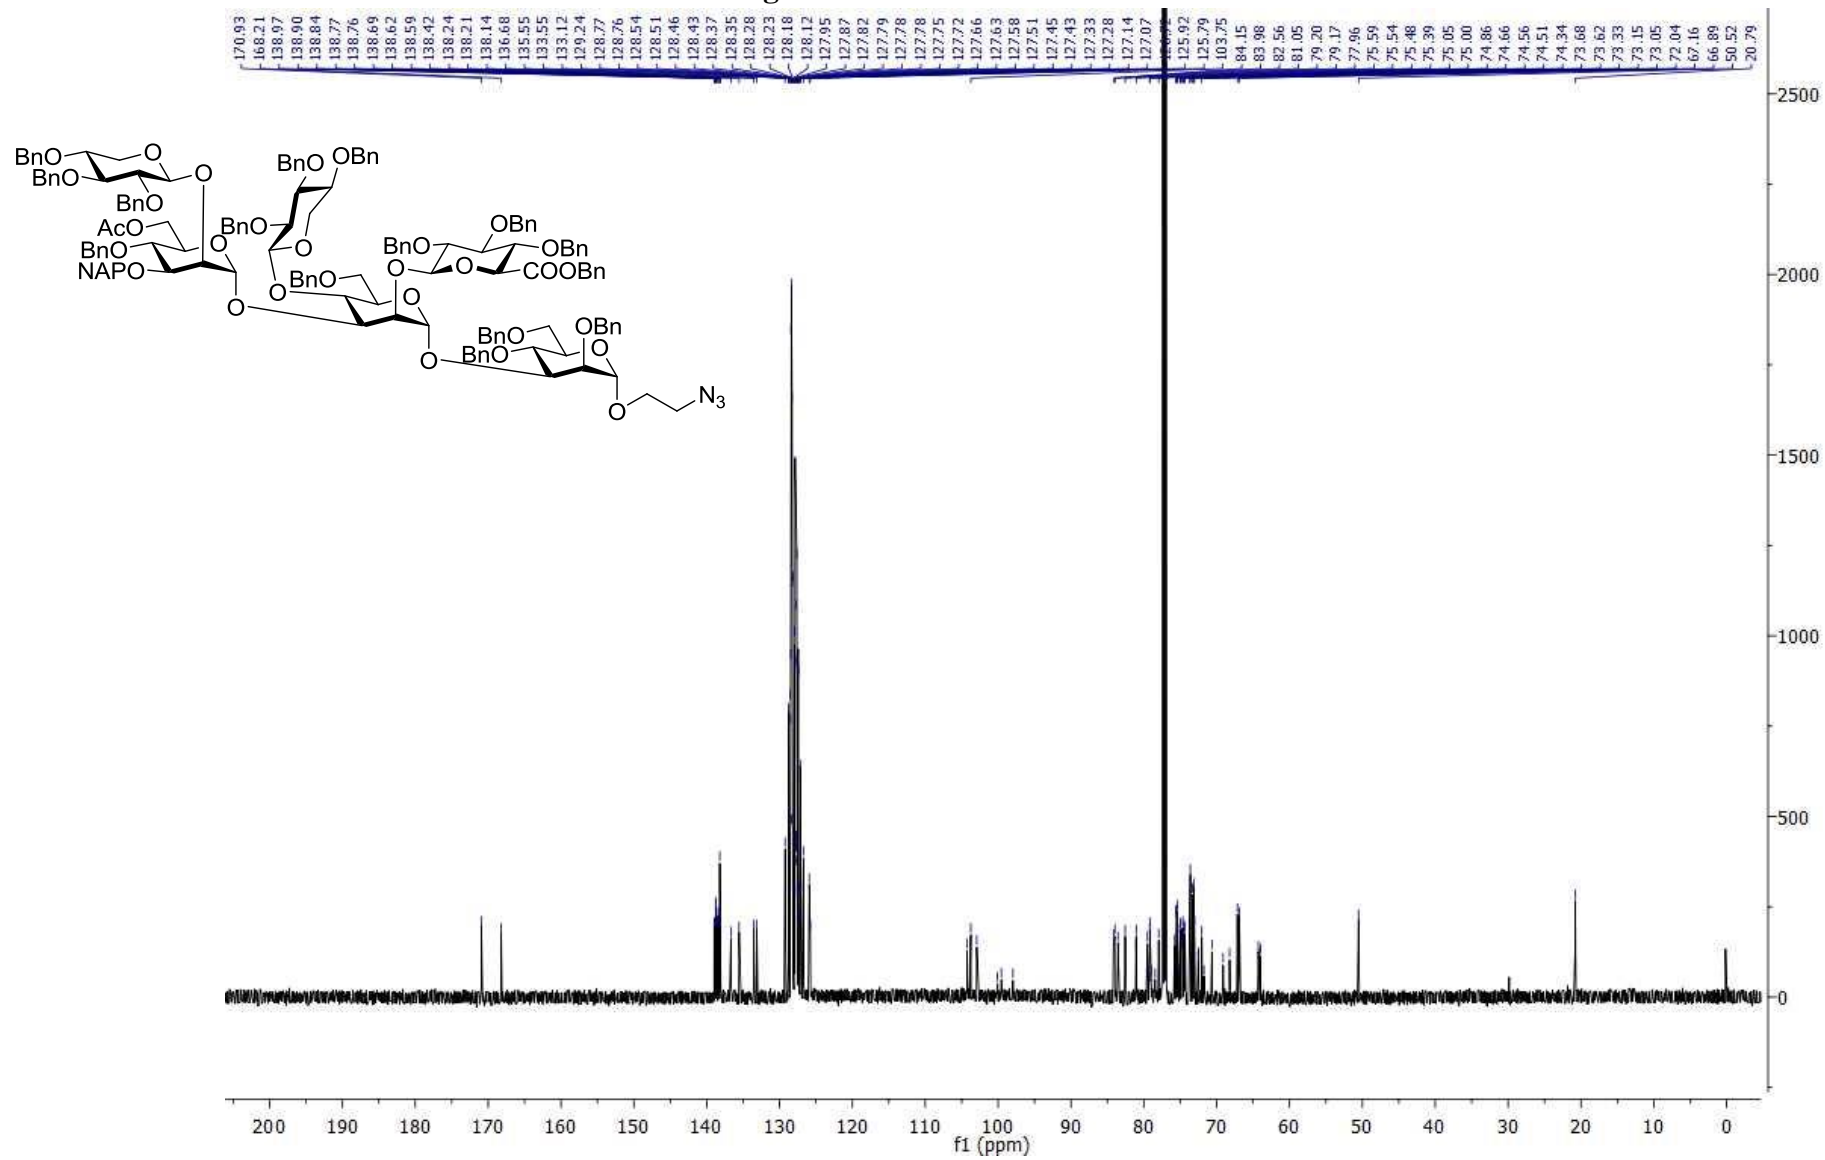

Fig 25: <sup>1</sup>H NMR of 15 at 25 °C

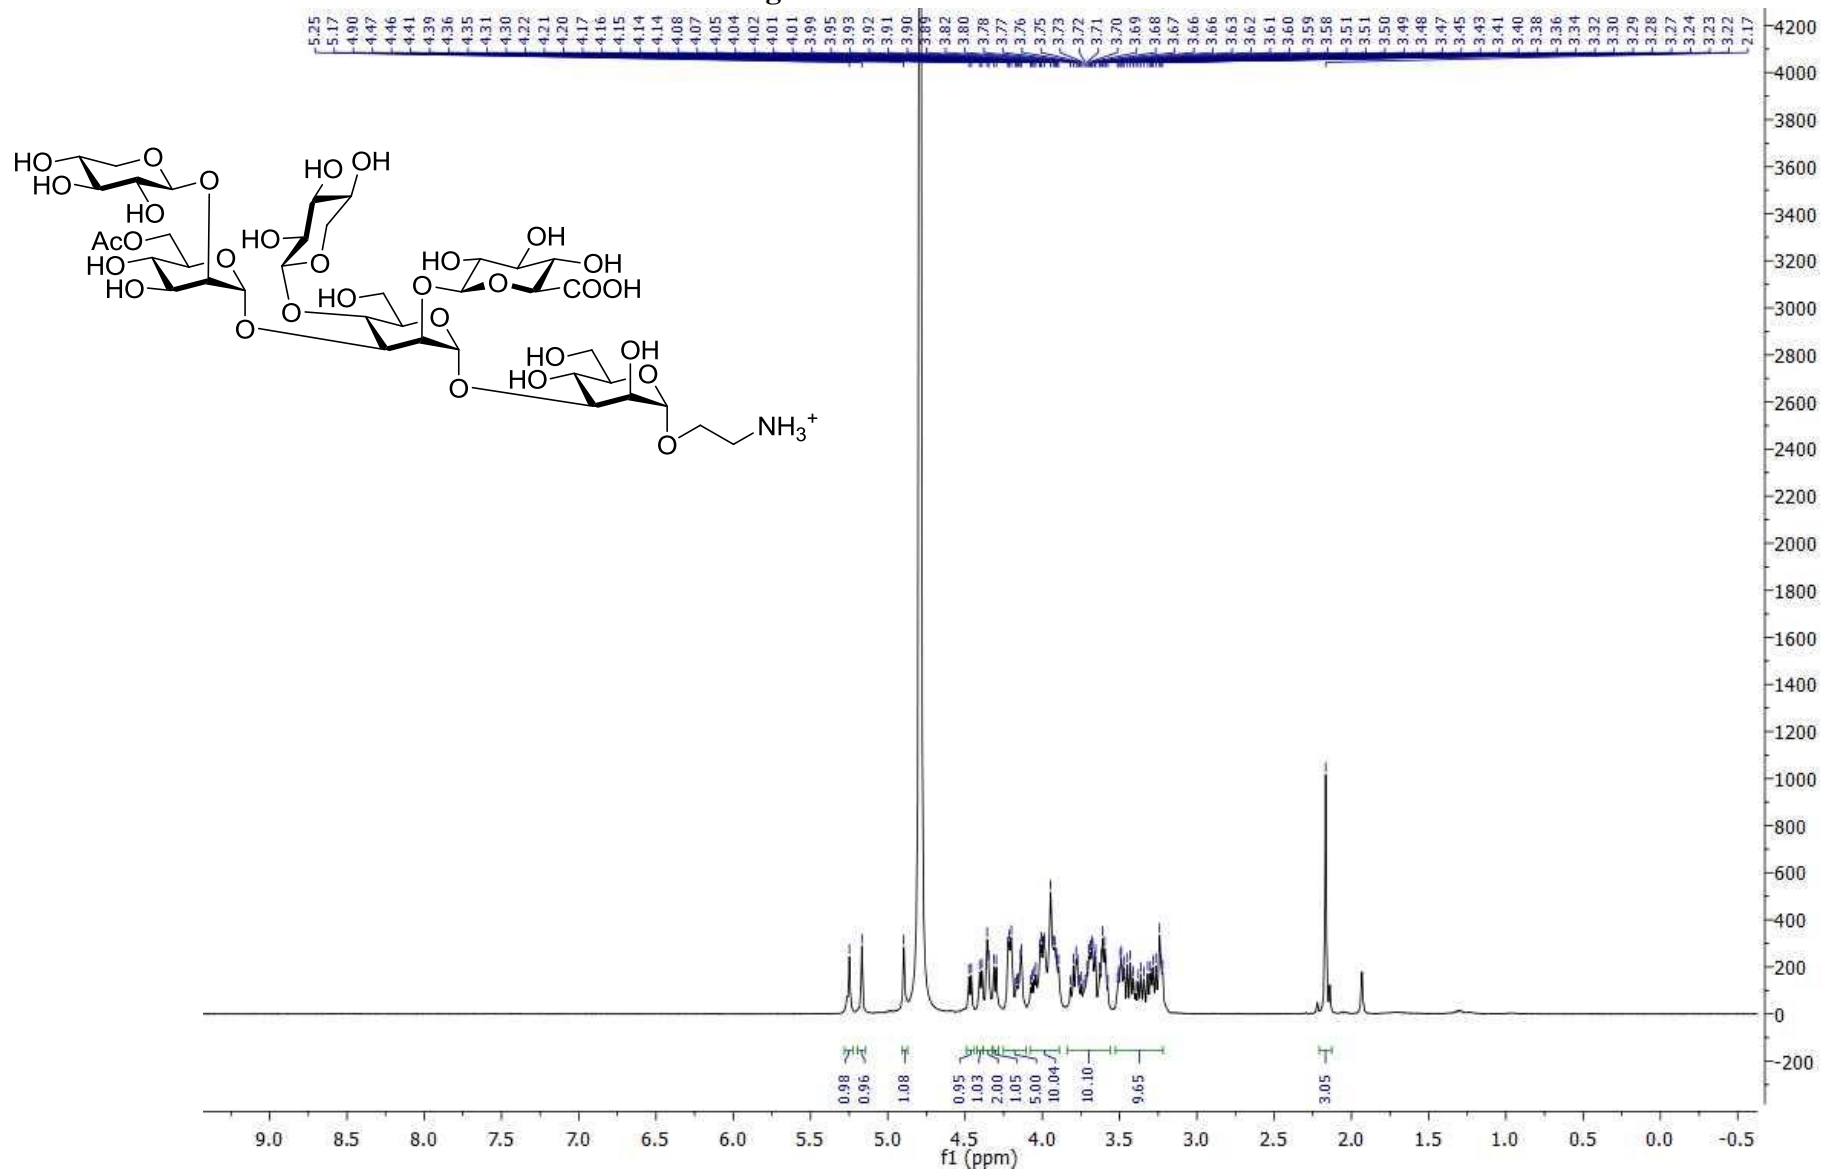

Fig 26:  $^1\text{H}$ - $^{13}\text{C}$  HSQC NMR of **15** at 25 °C

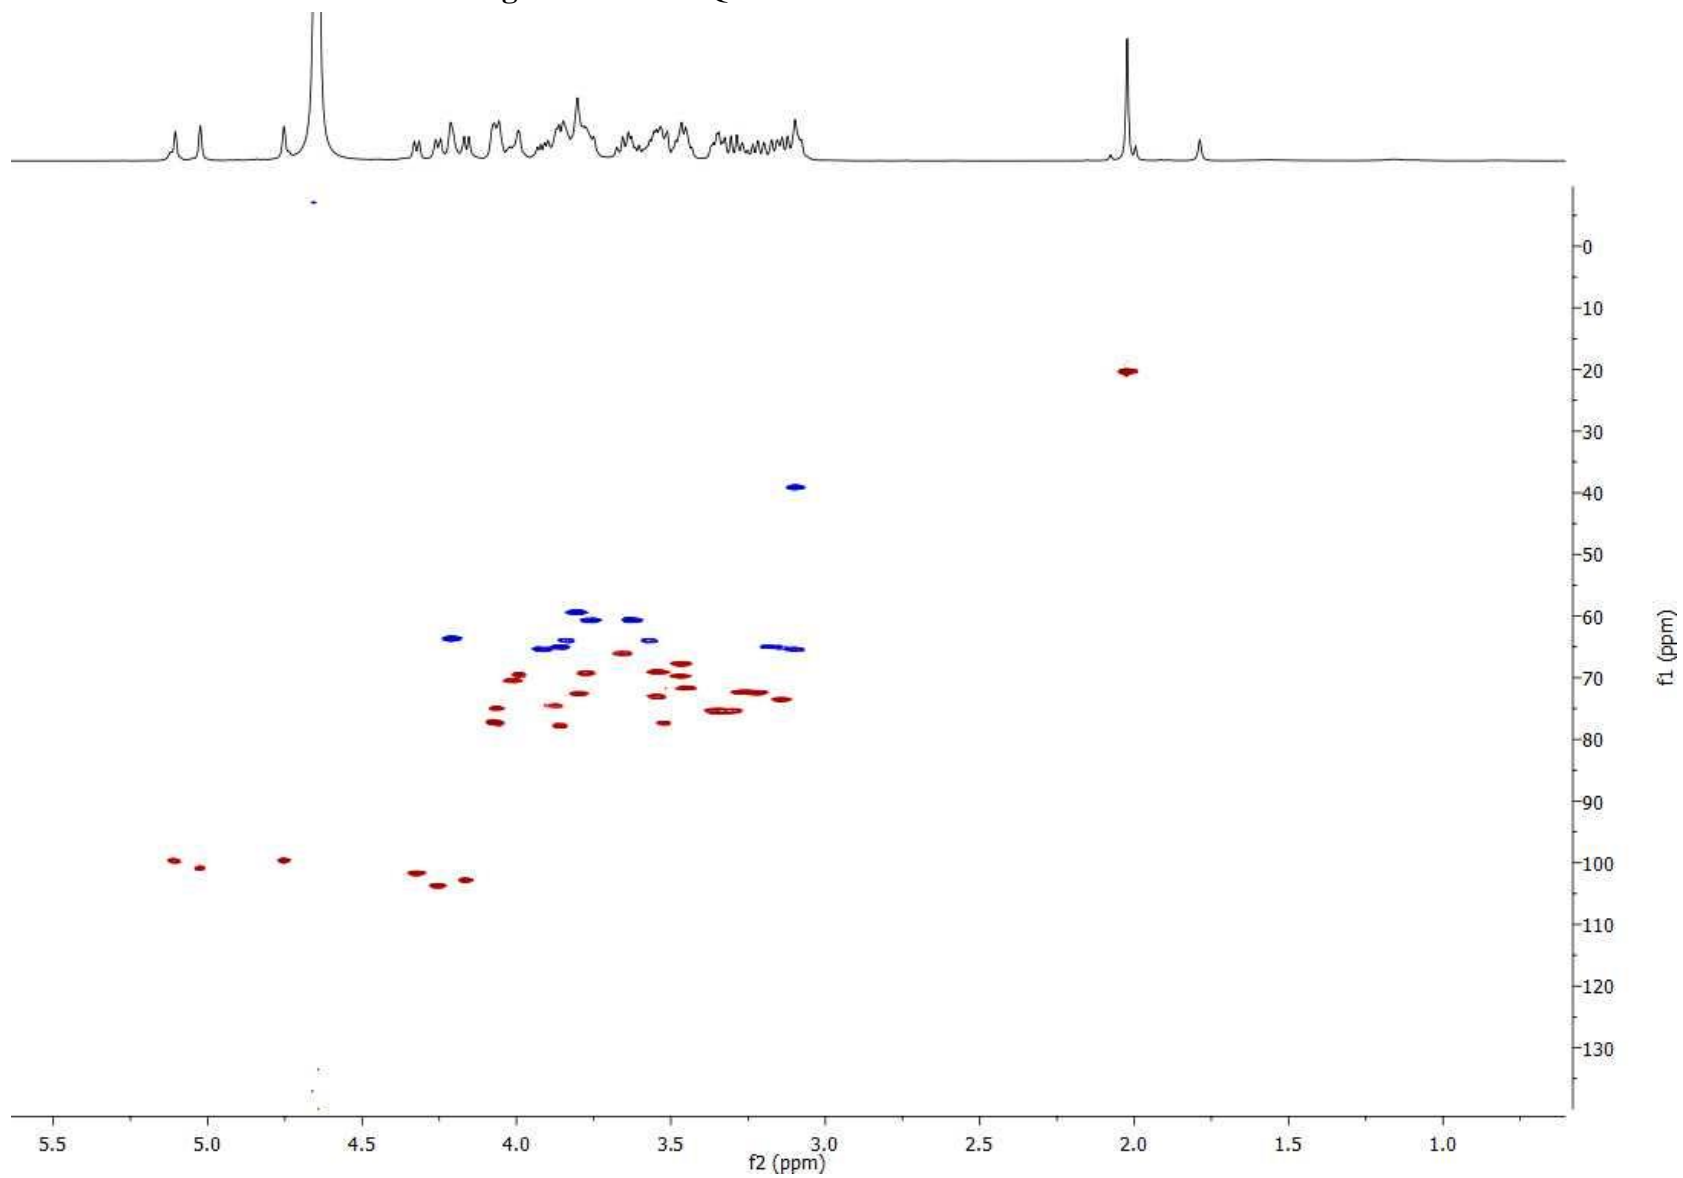

Fig 27: <sup>1</sup>H NMR of 17 at 25 °C

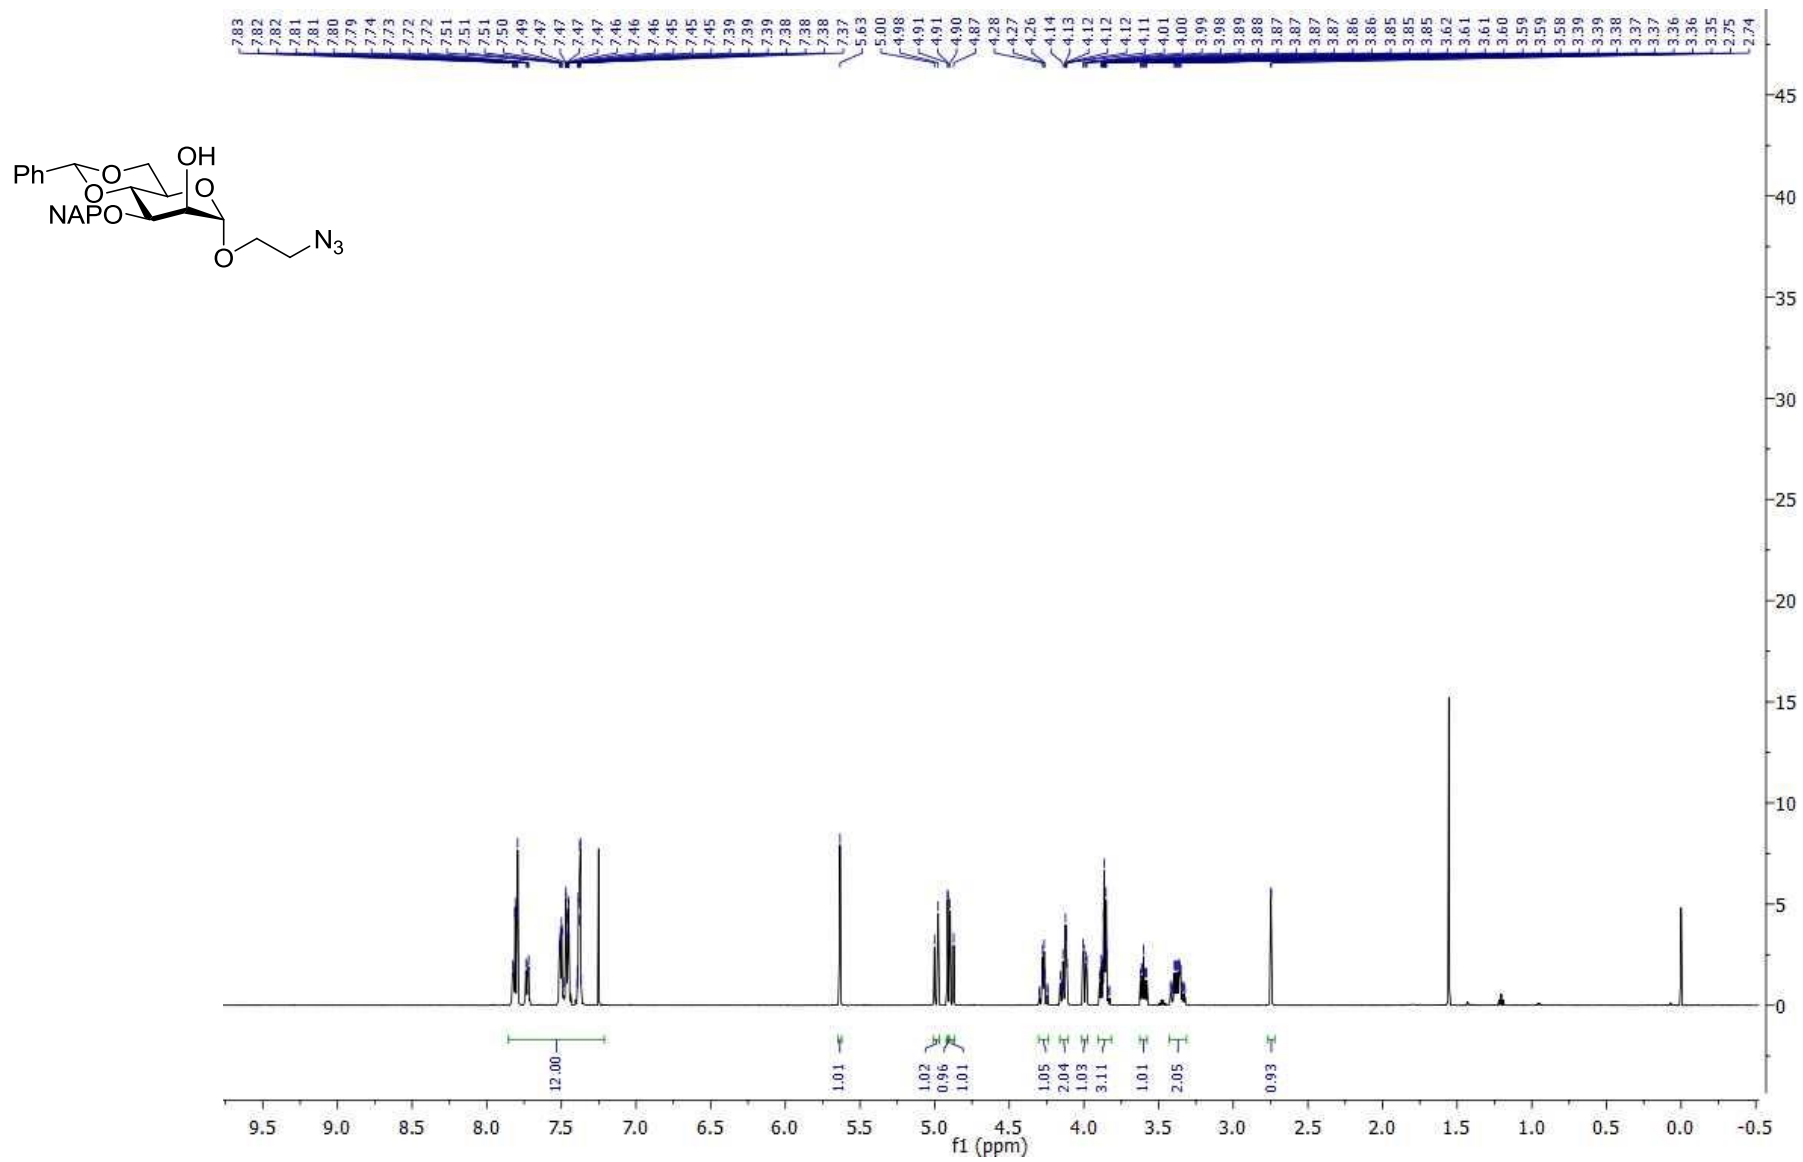

Fig 28:  $^{13}\text{C}$  NMR of **17** at 25 °C

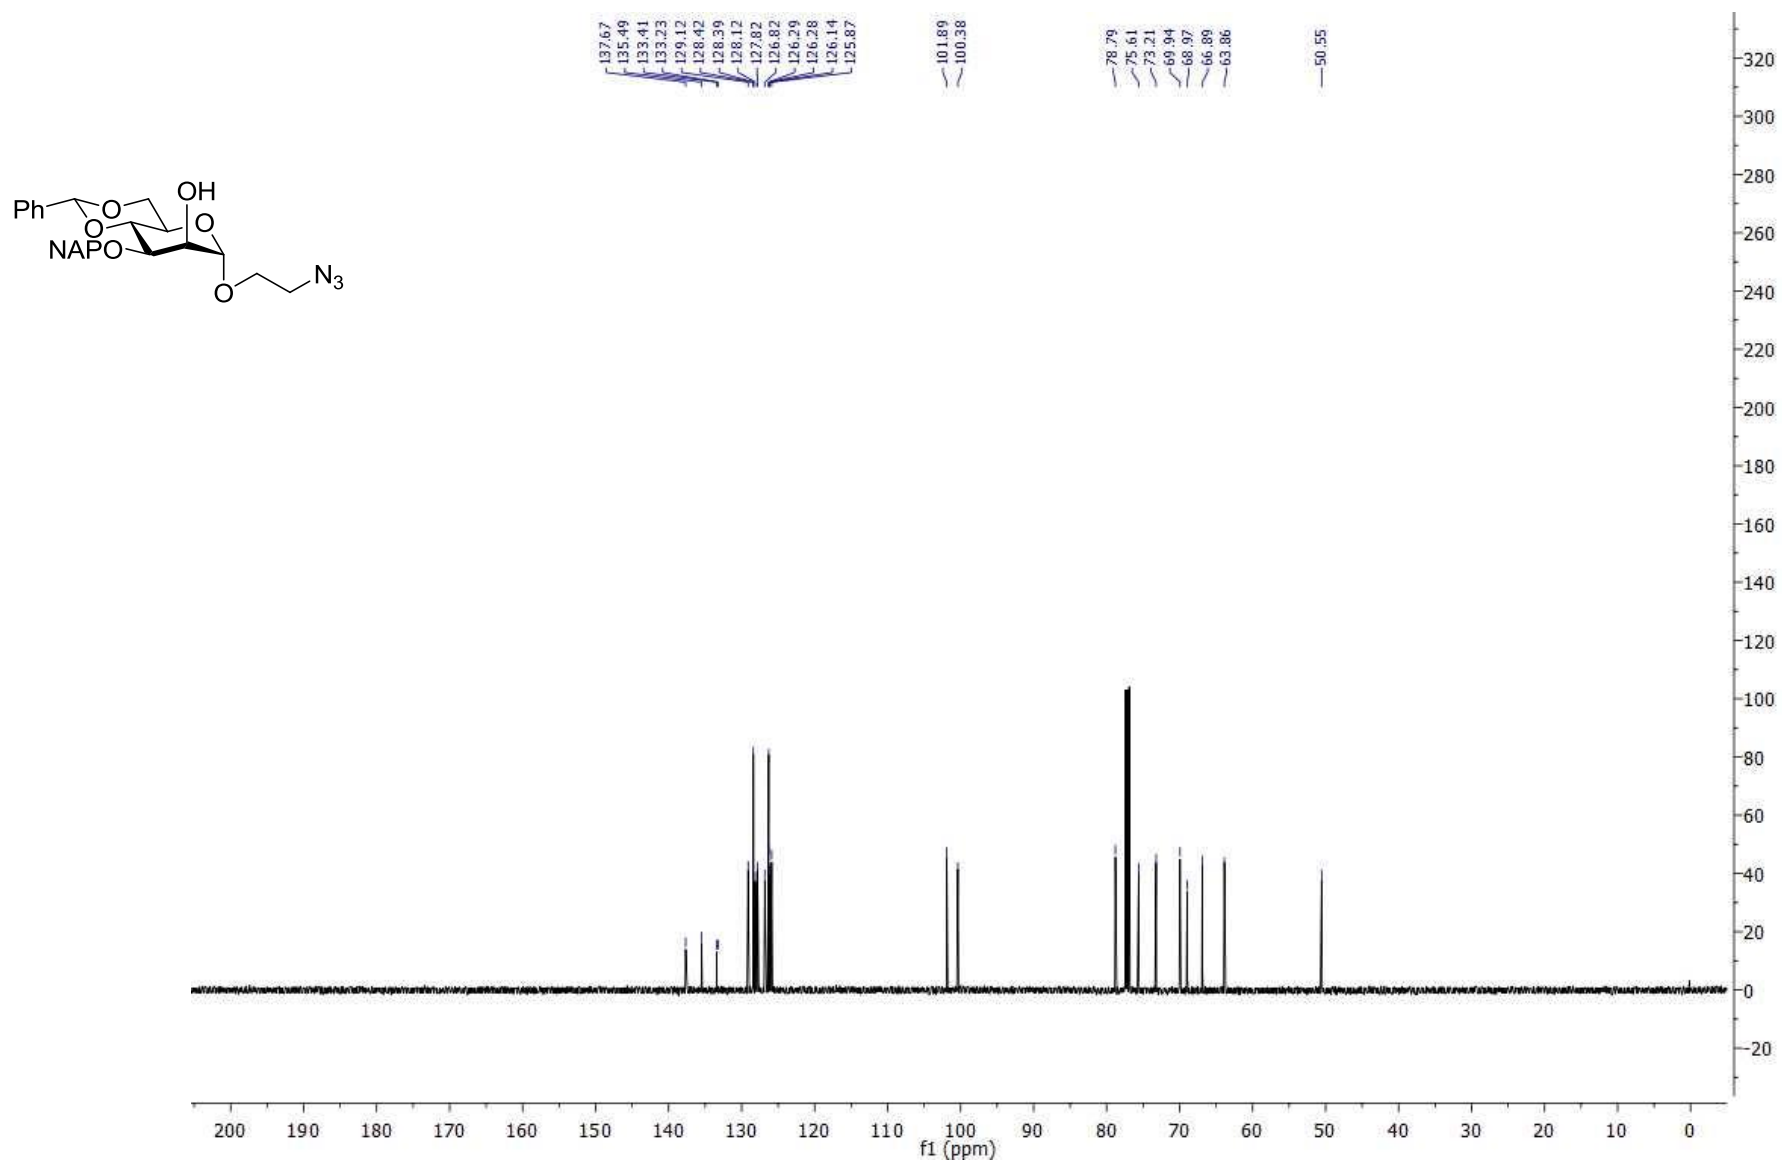

Fig 29: <sup>1</sup>H NMR of 18 at 25 °C

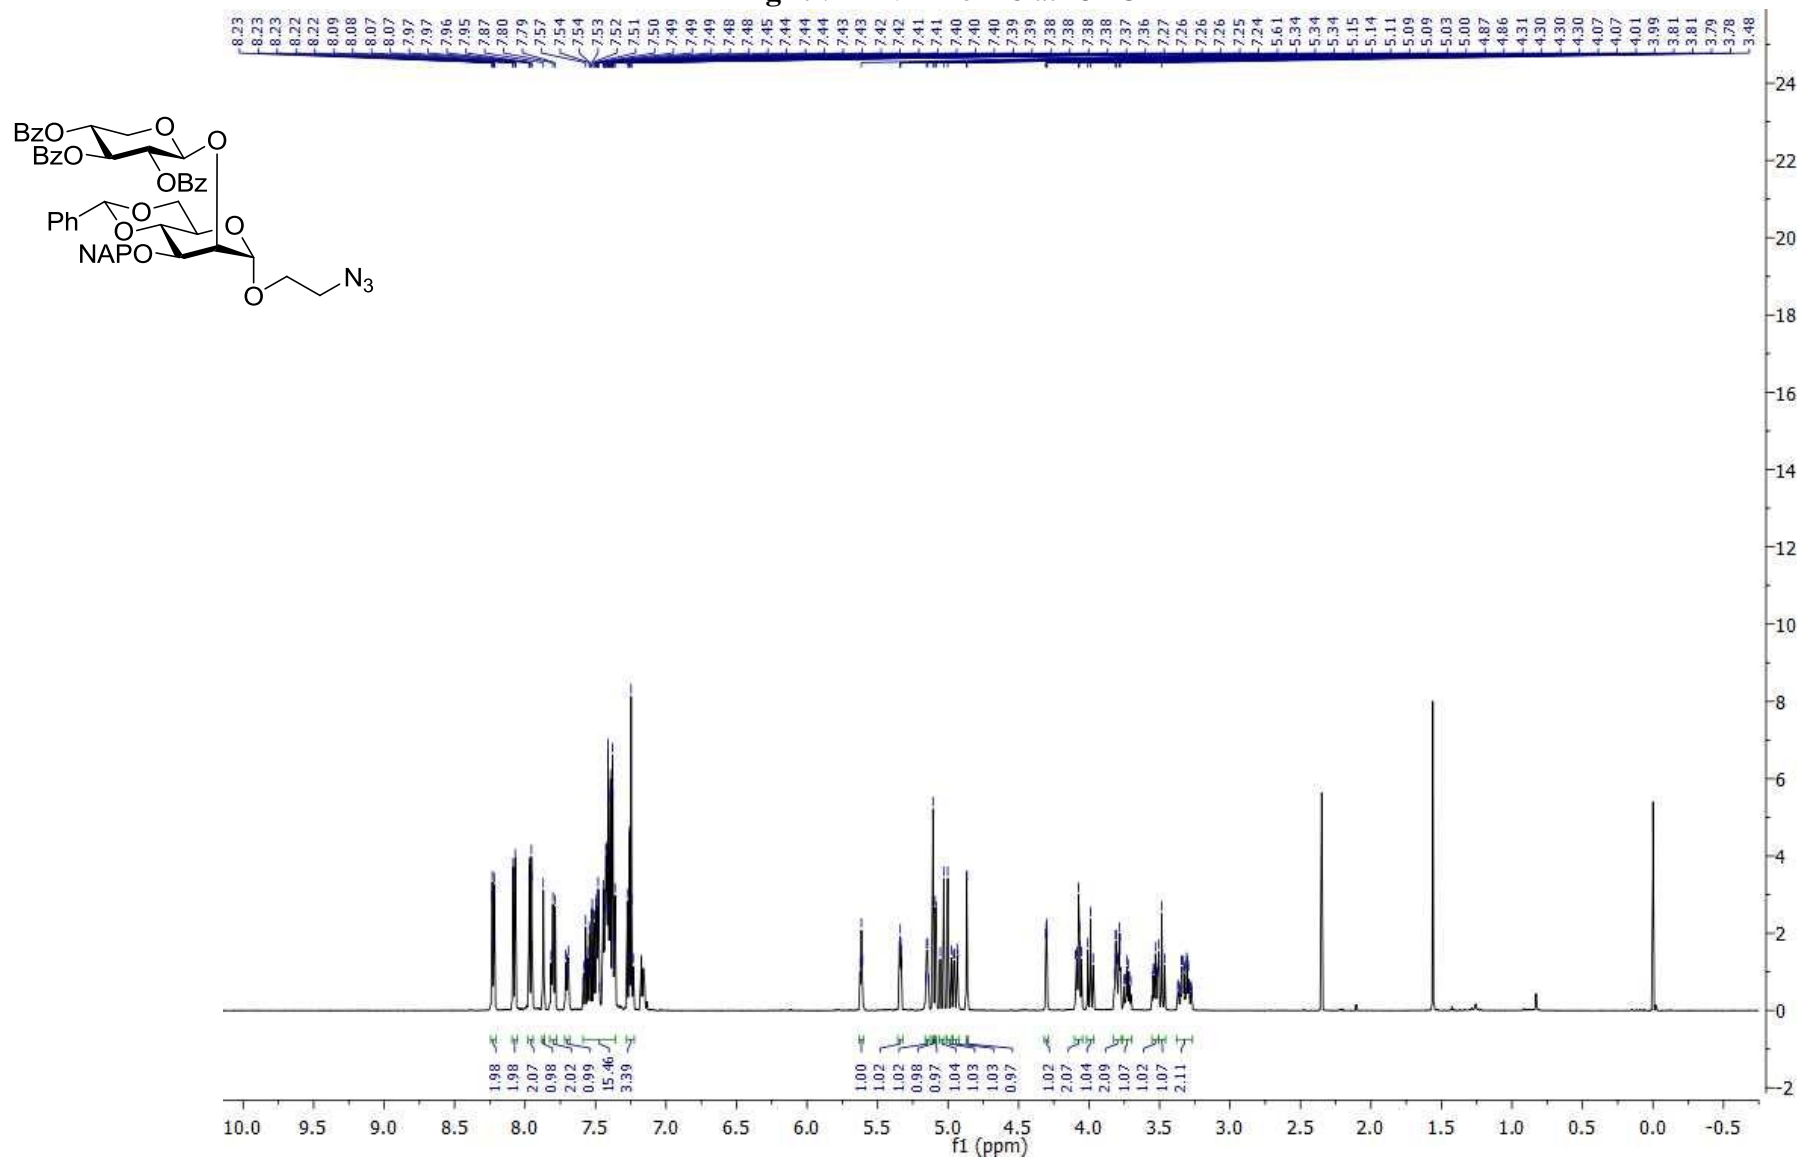

Fig 30:  $^{13}\text{C}$  NMR of **18** at 25 °C

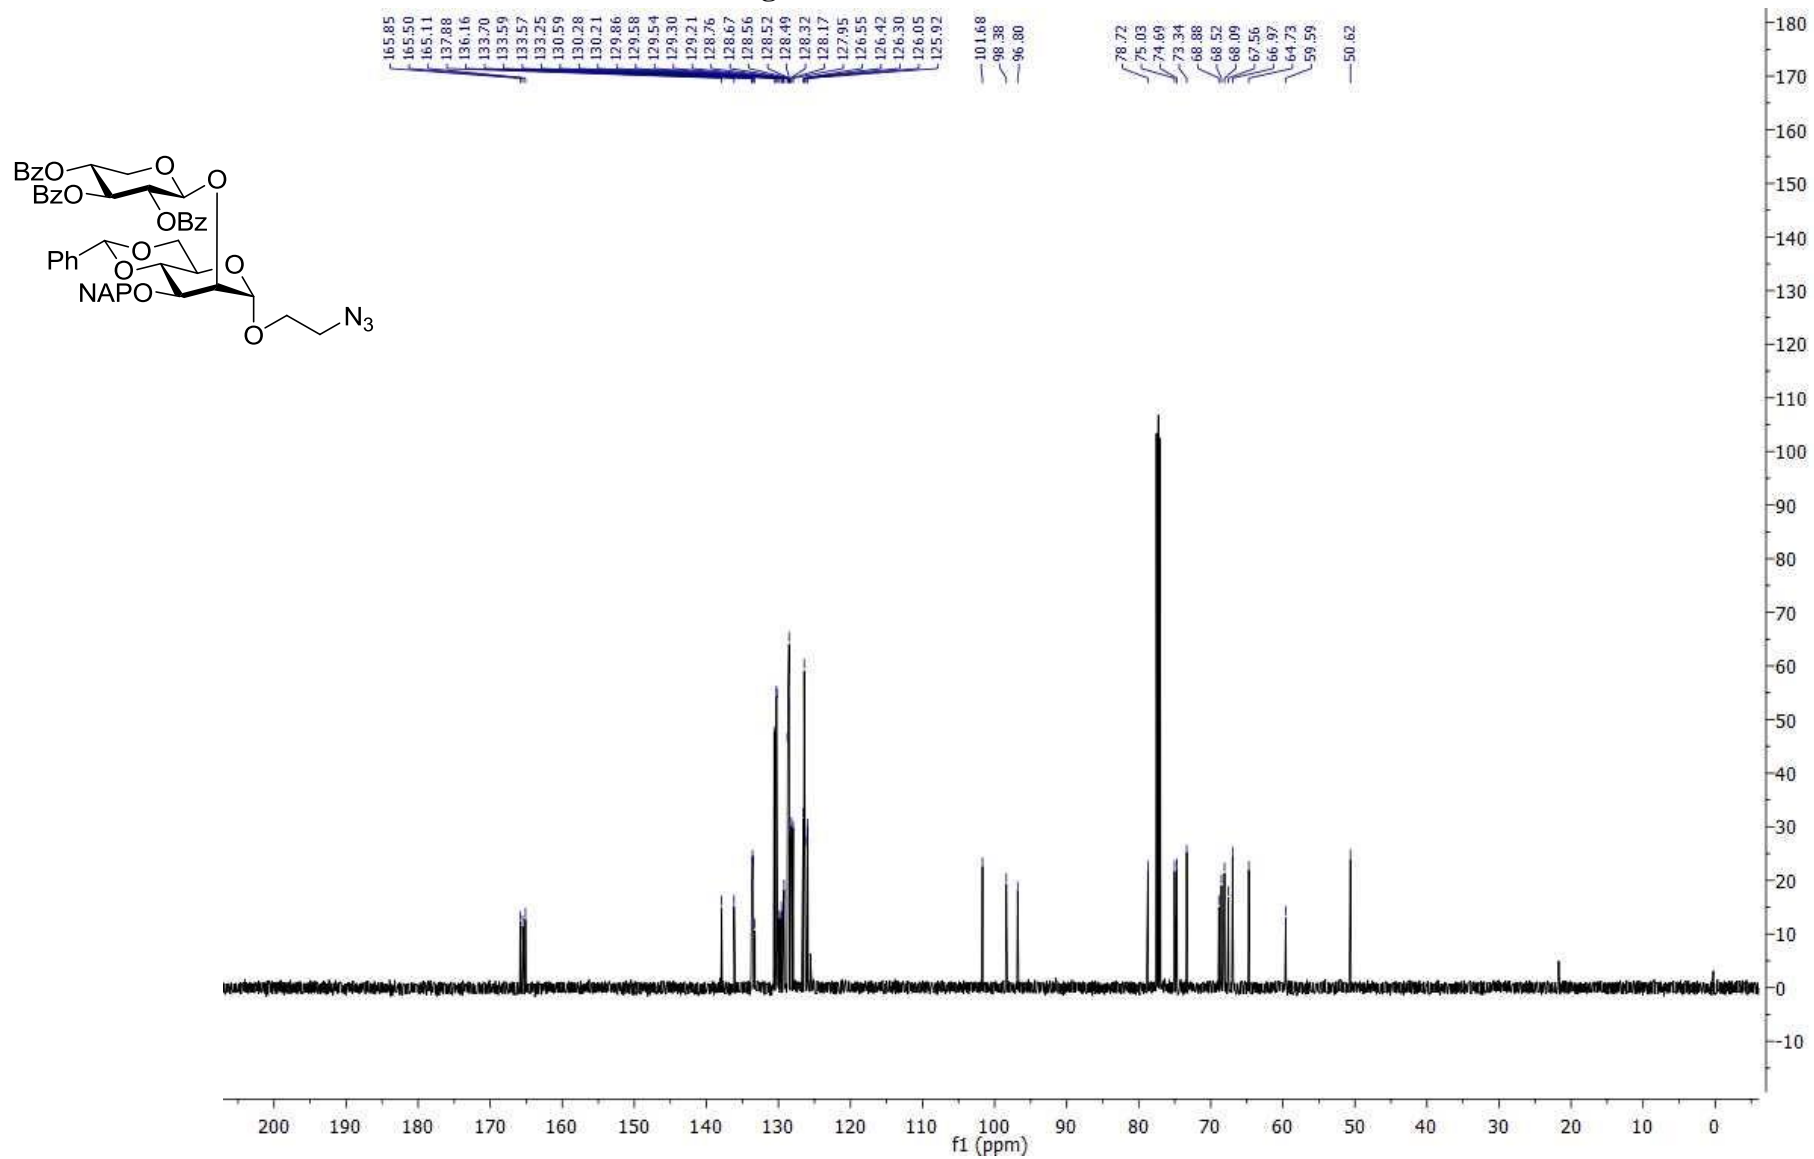





Fig 32:  $^{13}\text{C}$  NMR of **19** at 25 °C

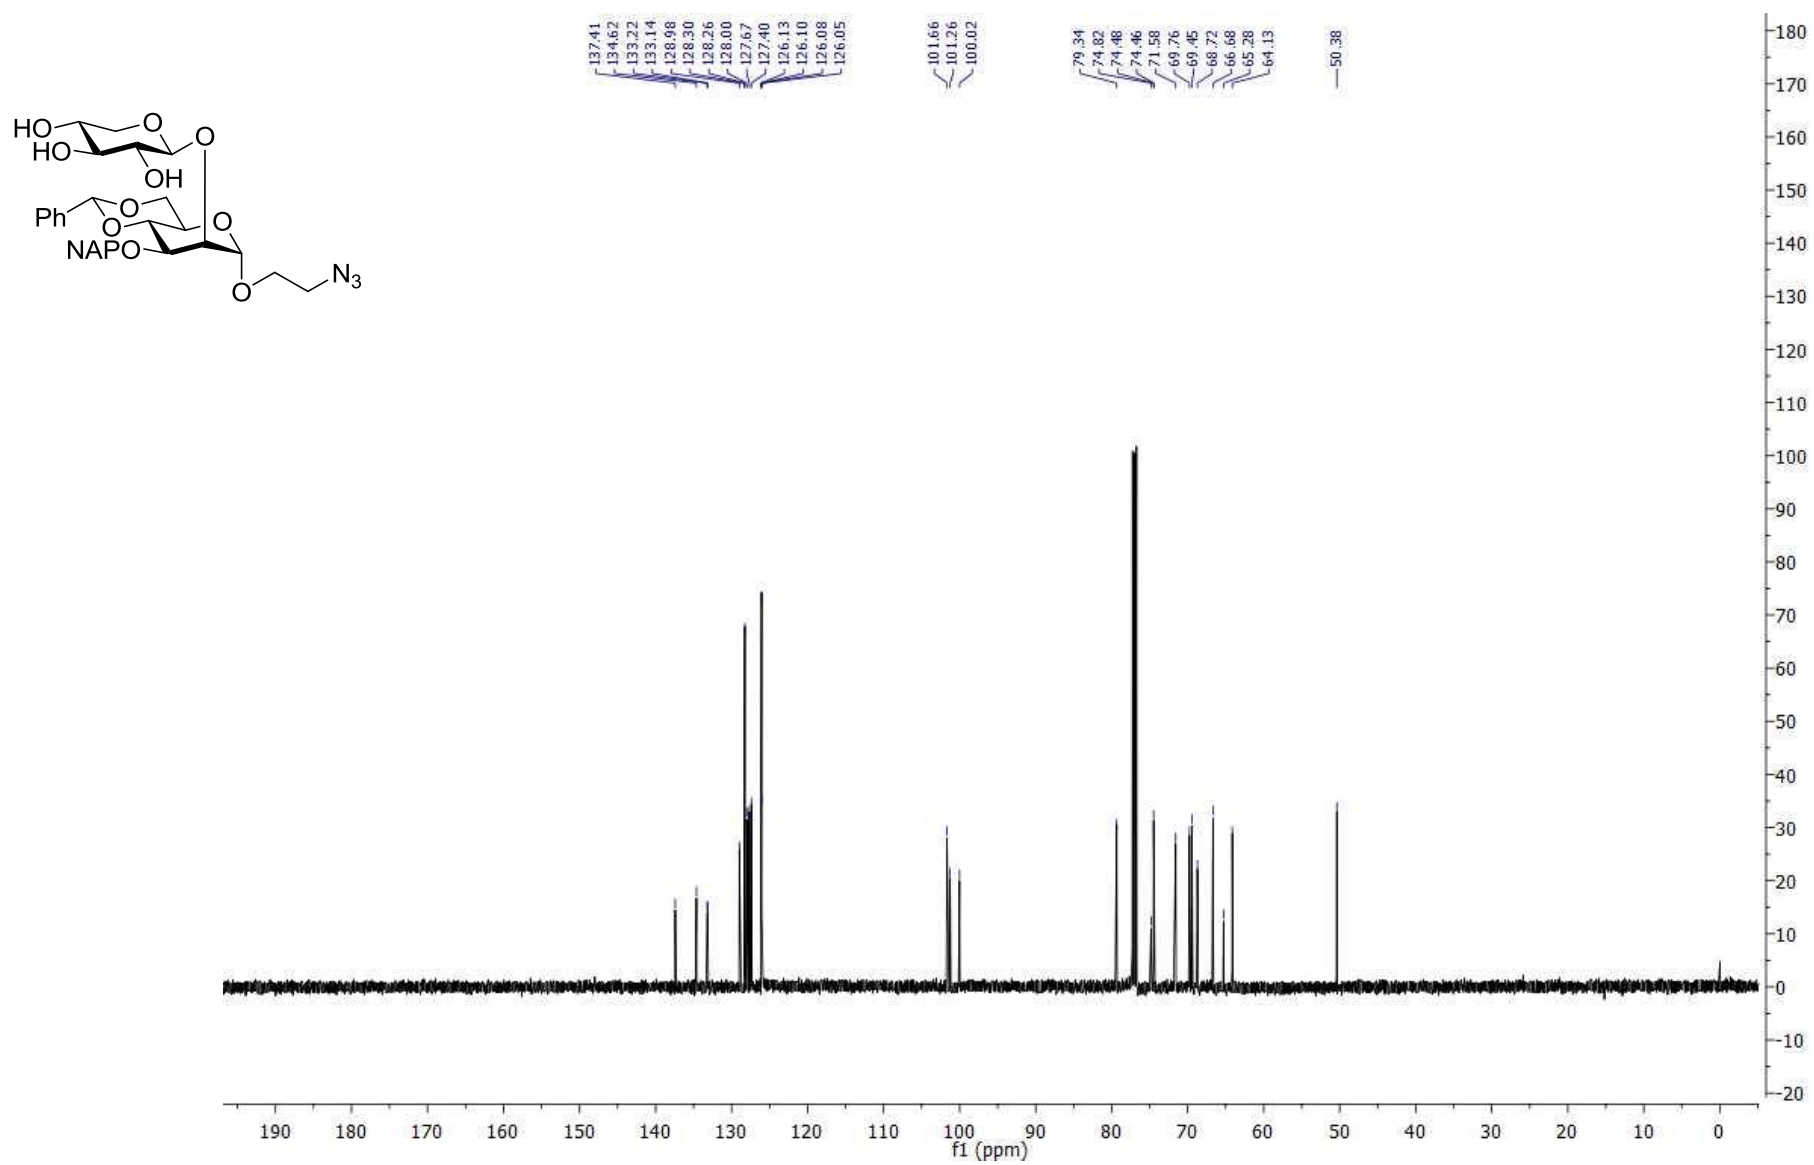

Fig 33: <sup>1</sup>H NMR of 20 at 25 °C

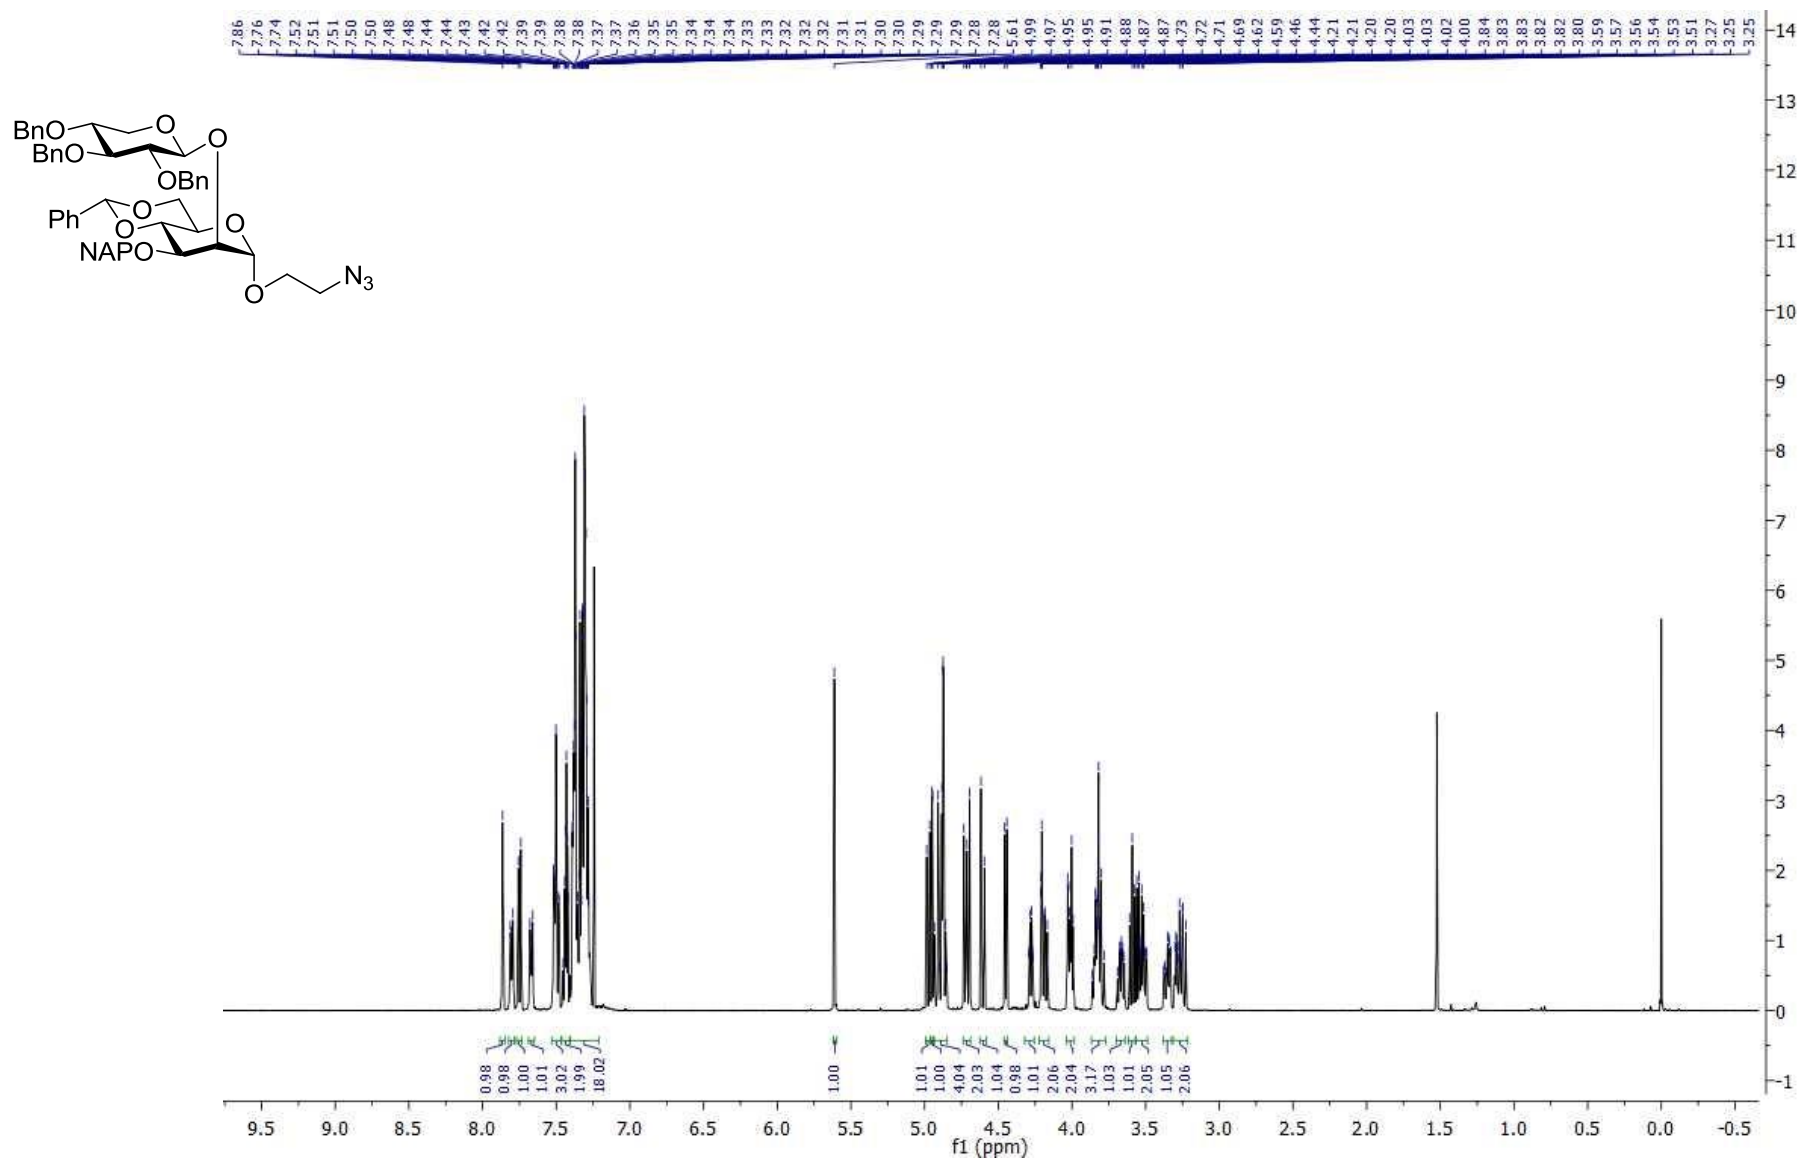

Fig 34:  $^{13}\text{C}$  NMR of **20** at 25 °C

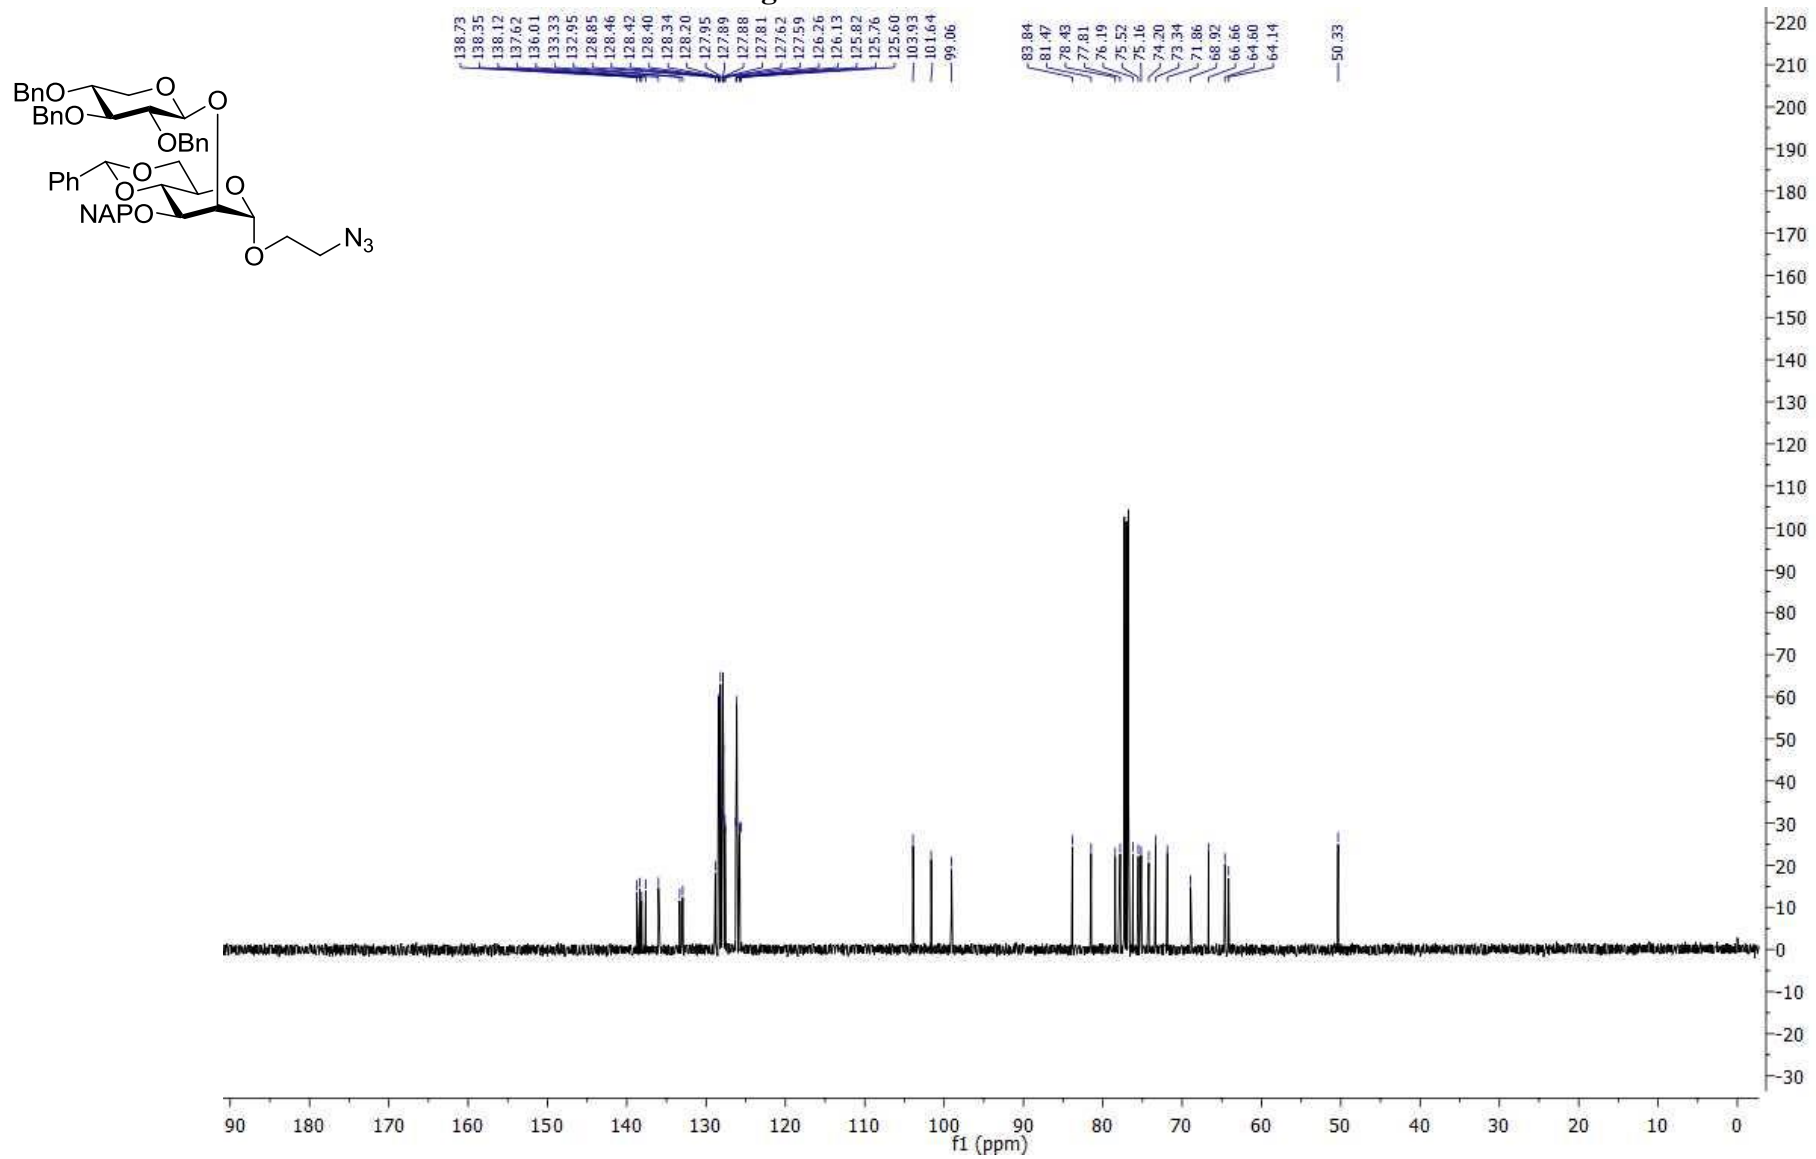

Fig 35: <sup>1</sup>H NMR of **21** at 25 °C

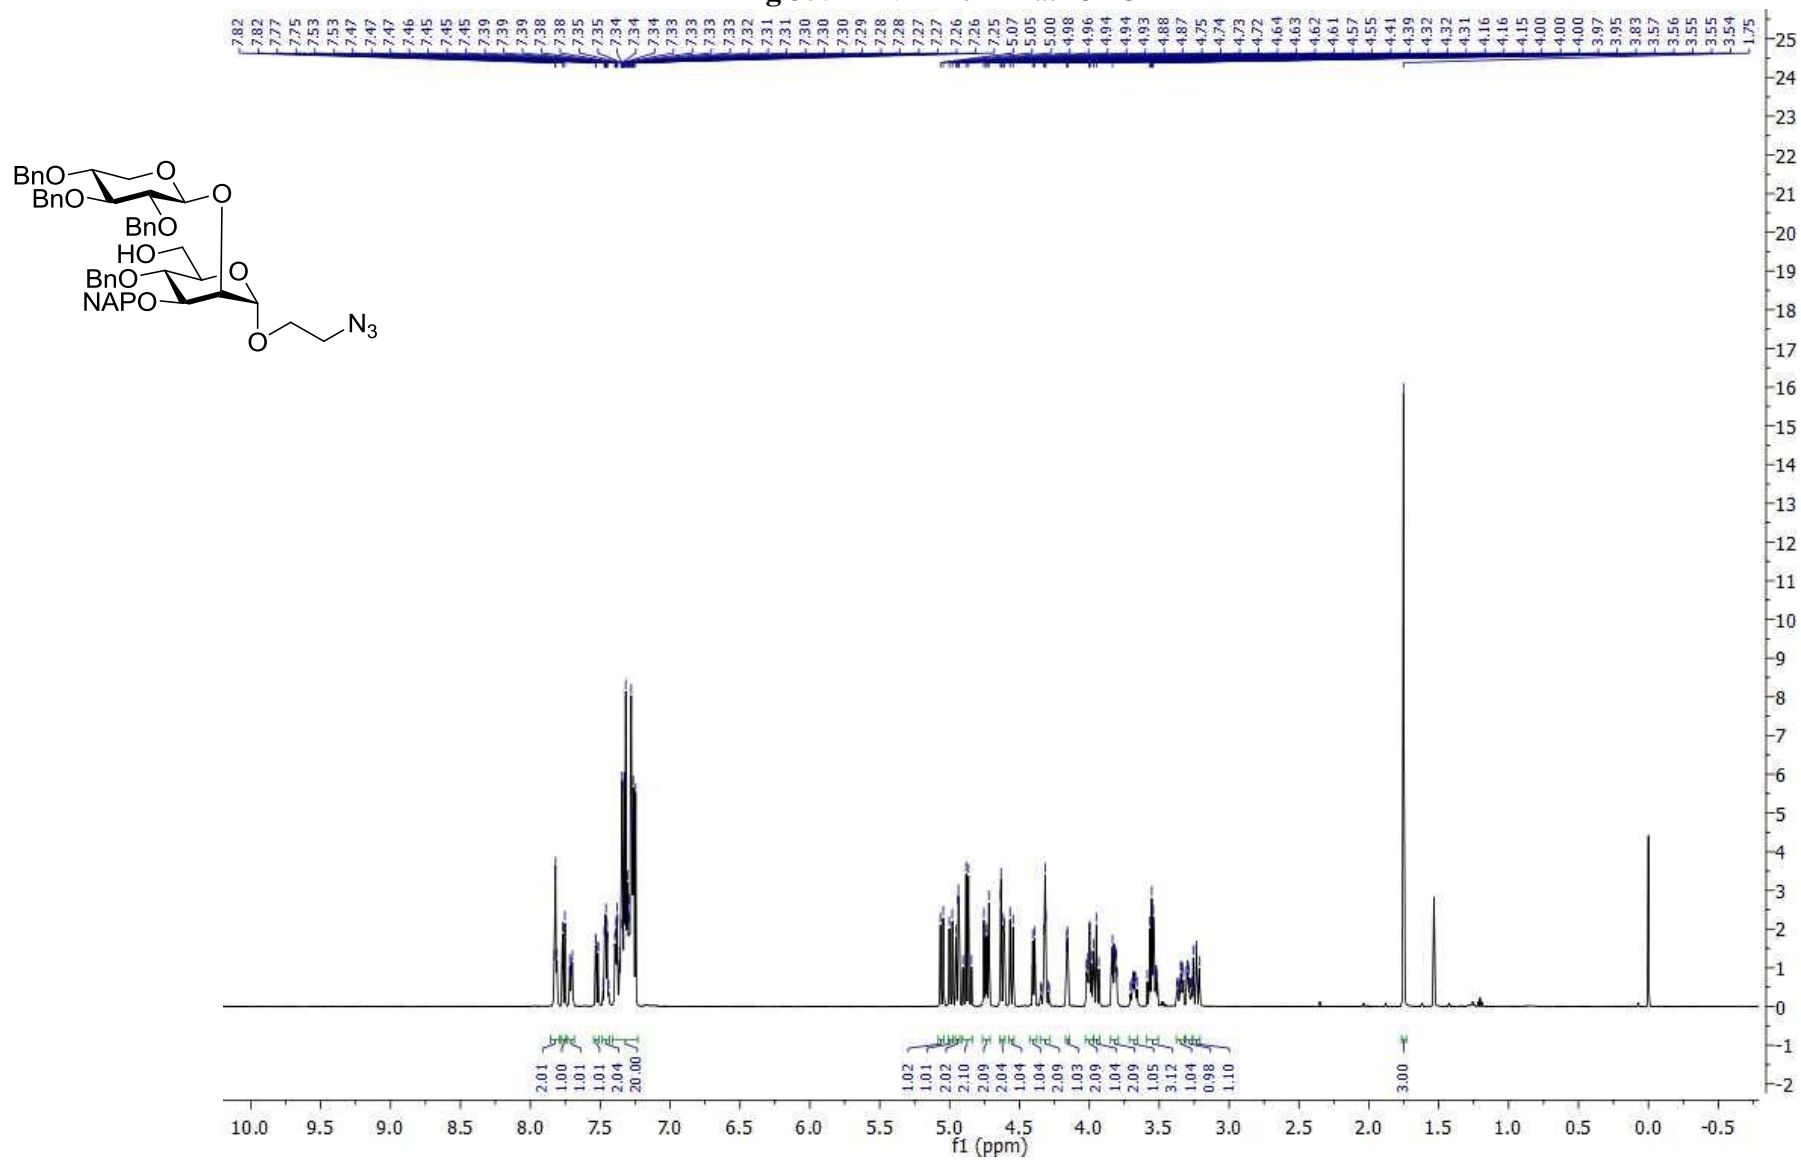

Fig 36:  $^{13}\text{C}$  NMR of **21** at 25 °C

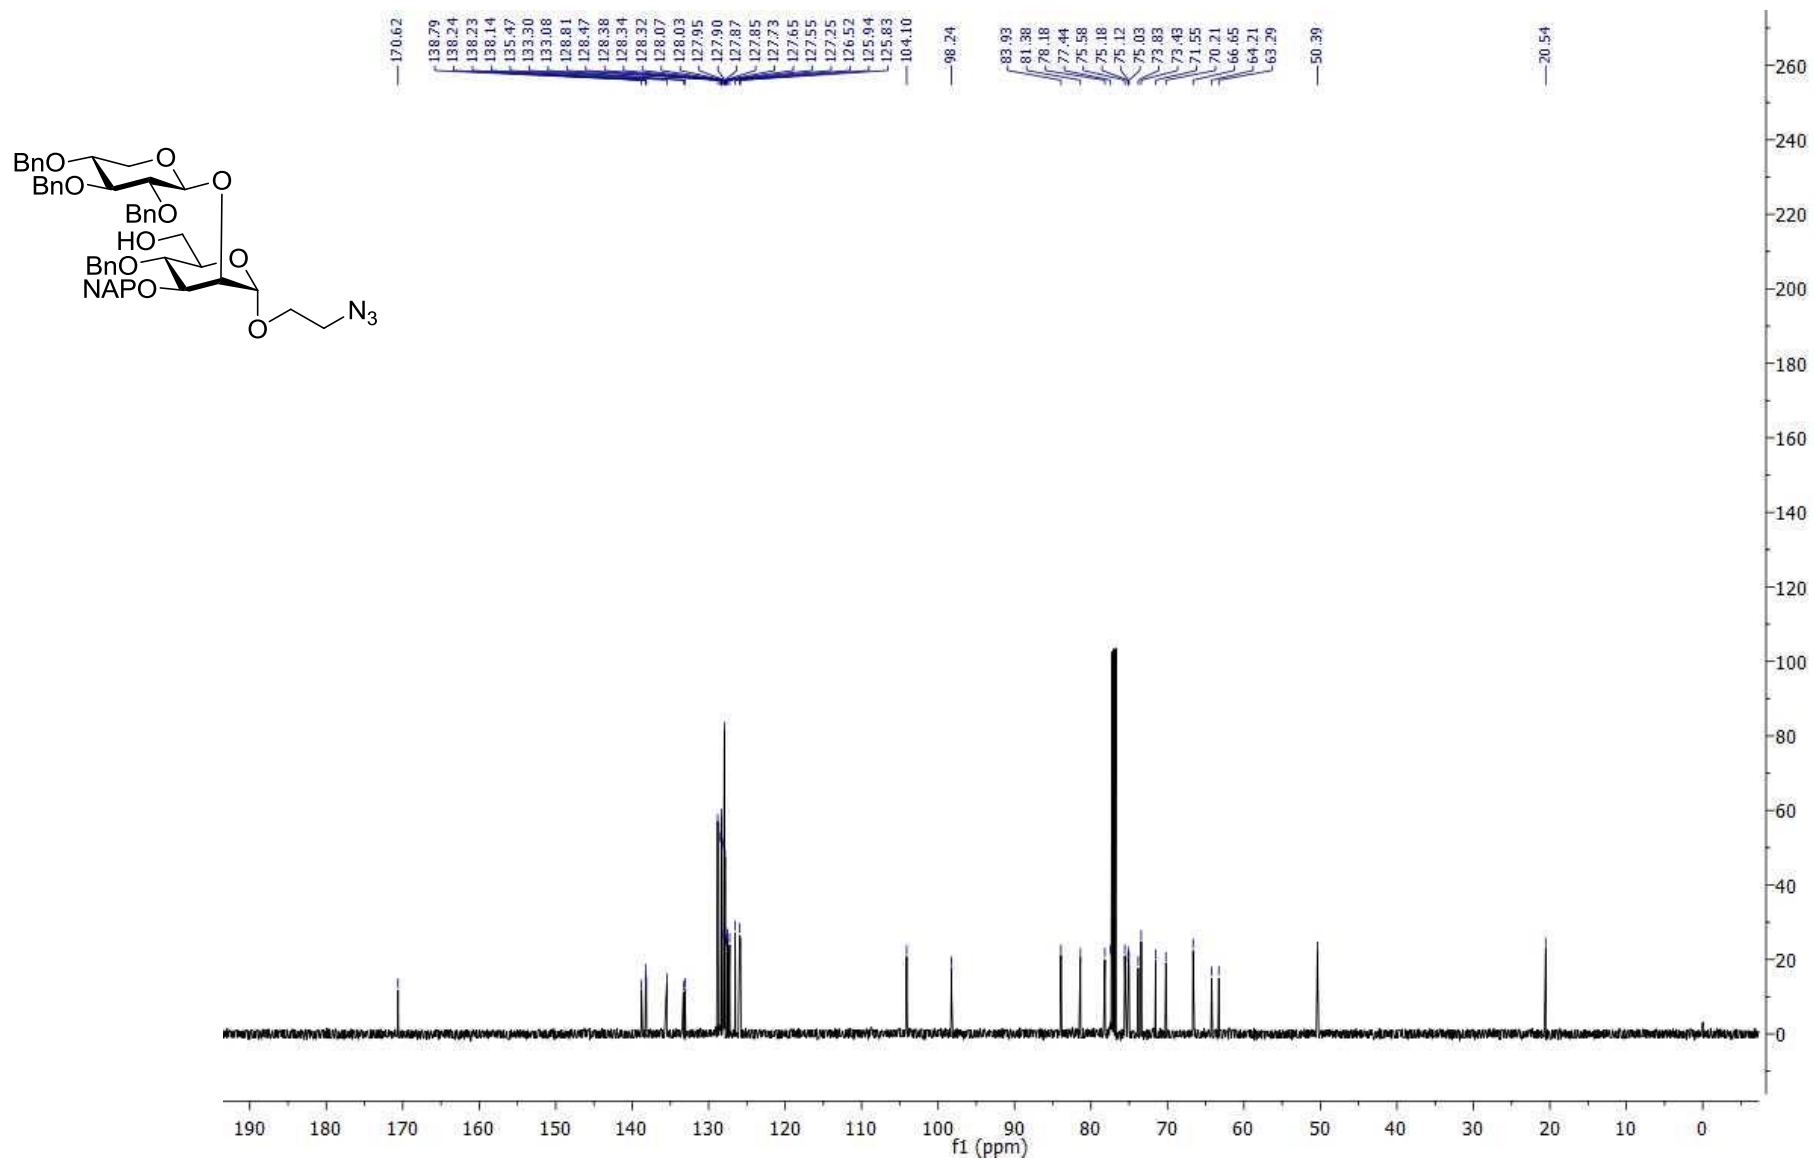



Fig 38:  $^{13}\text{C}$  NMR of **22** at 25 °C

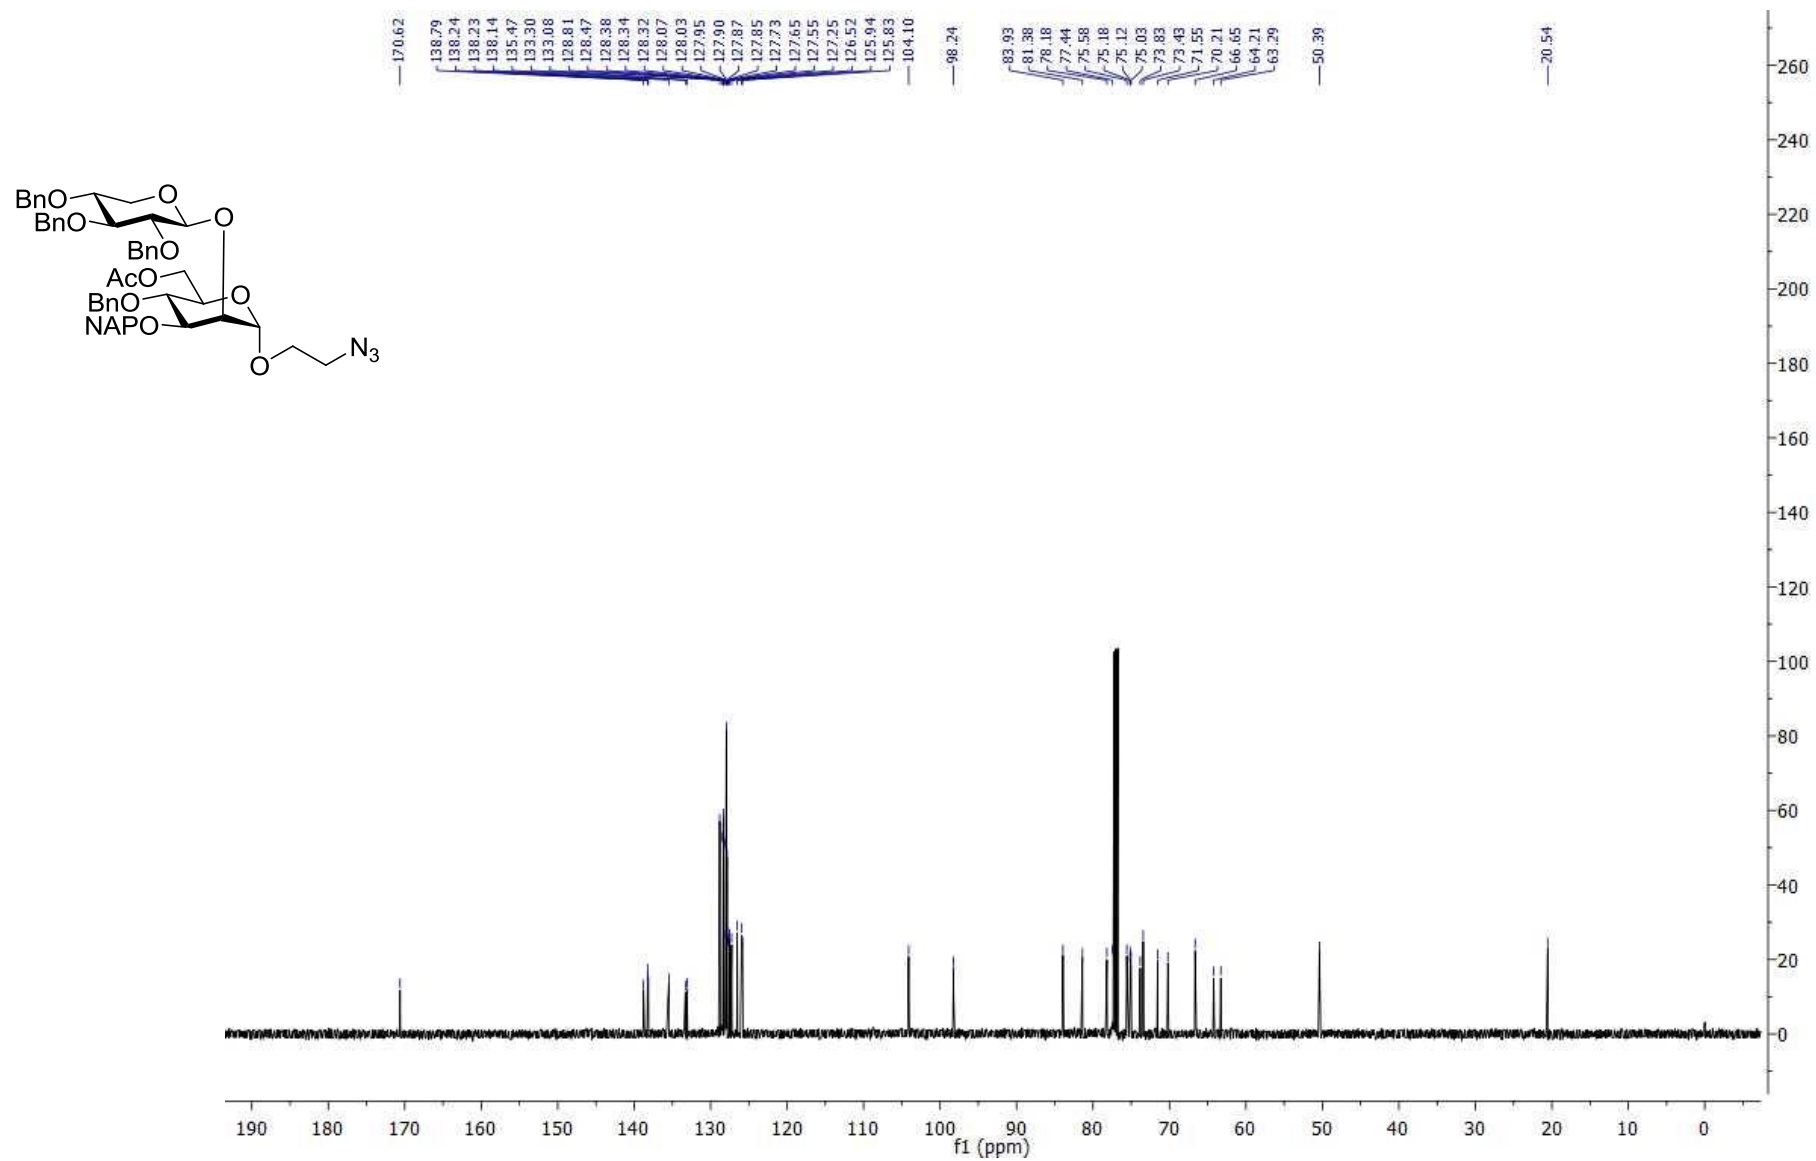



Fig 39: <sup>1</sup>H NMR of **23** at 25 °C

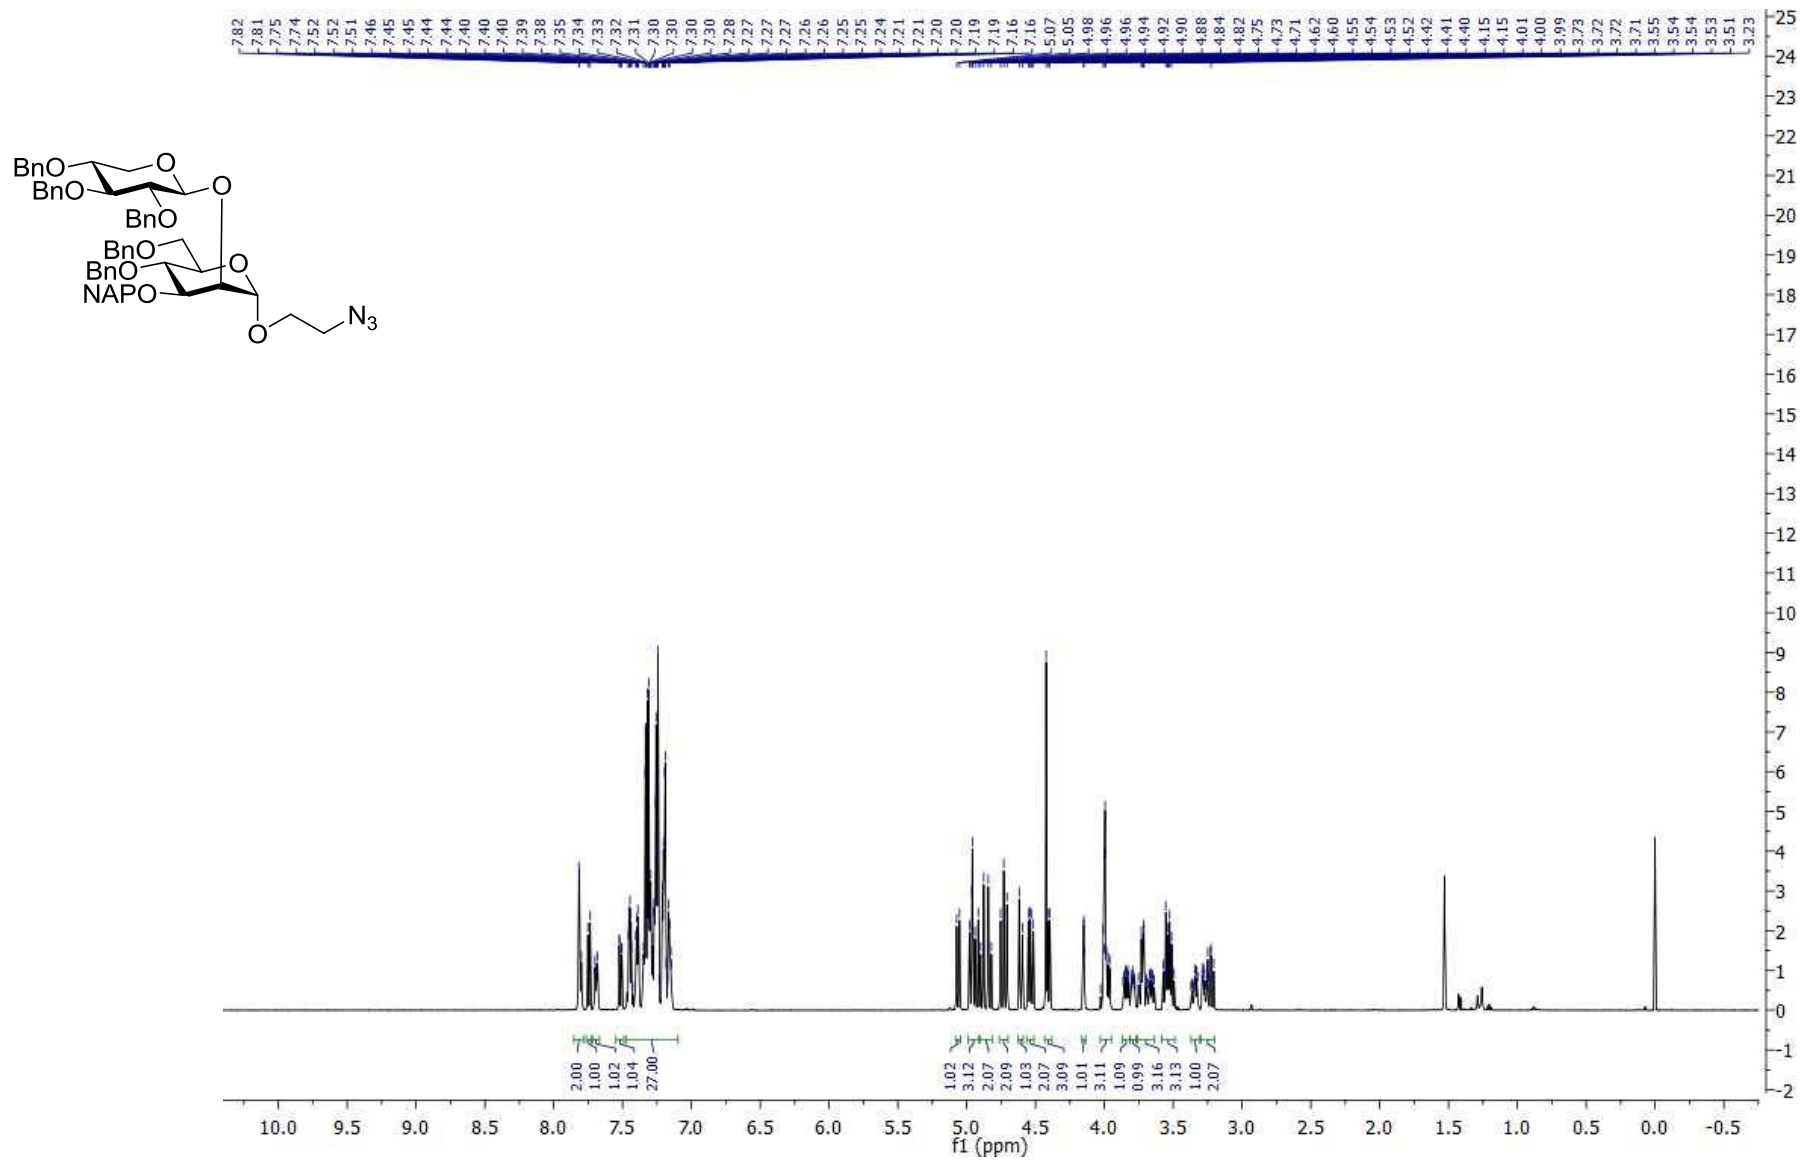

Fig 40:  $^{13}\text{C}$  NMR of **23** at 25 °C

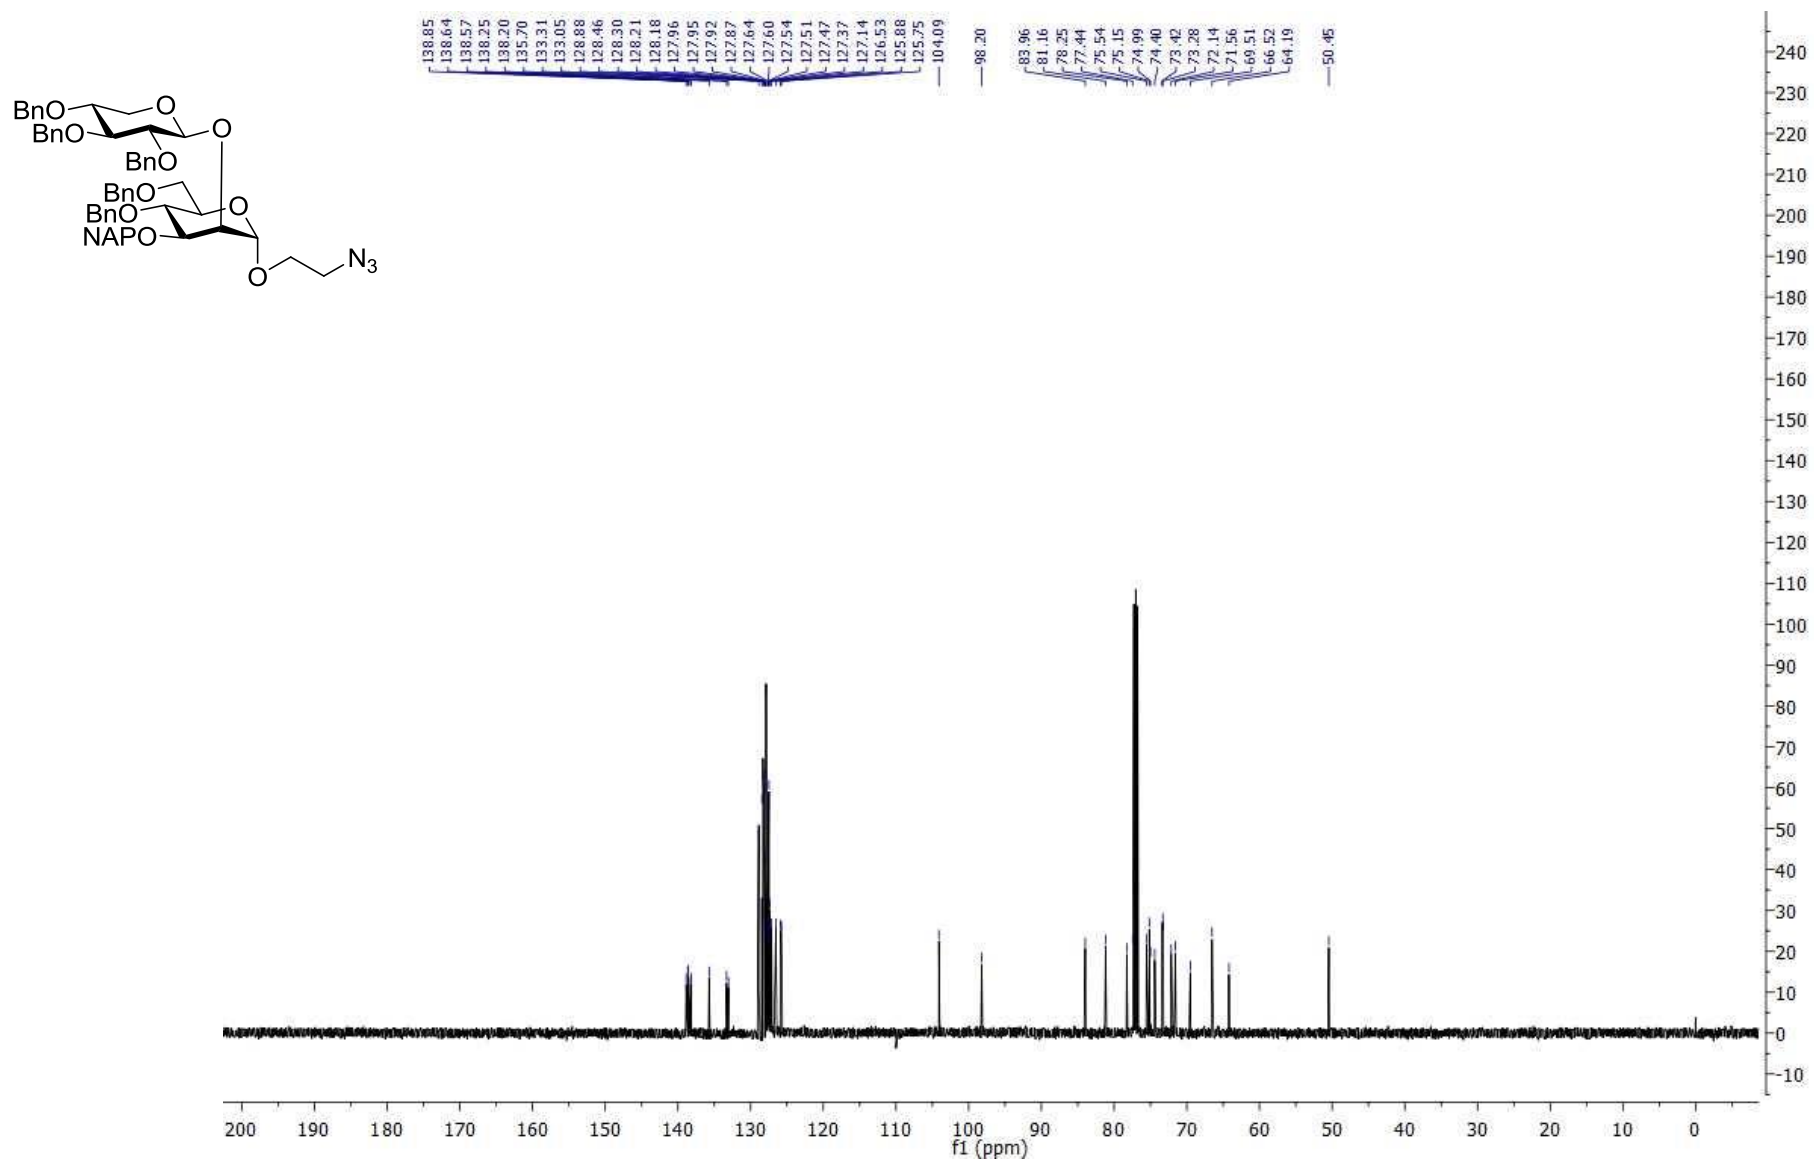

Fig 41: <sup>1</sup>H NMR of 24 at 25 °C

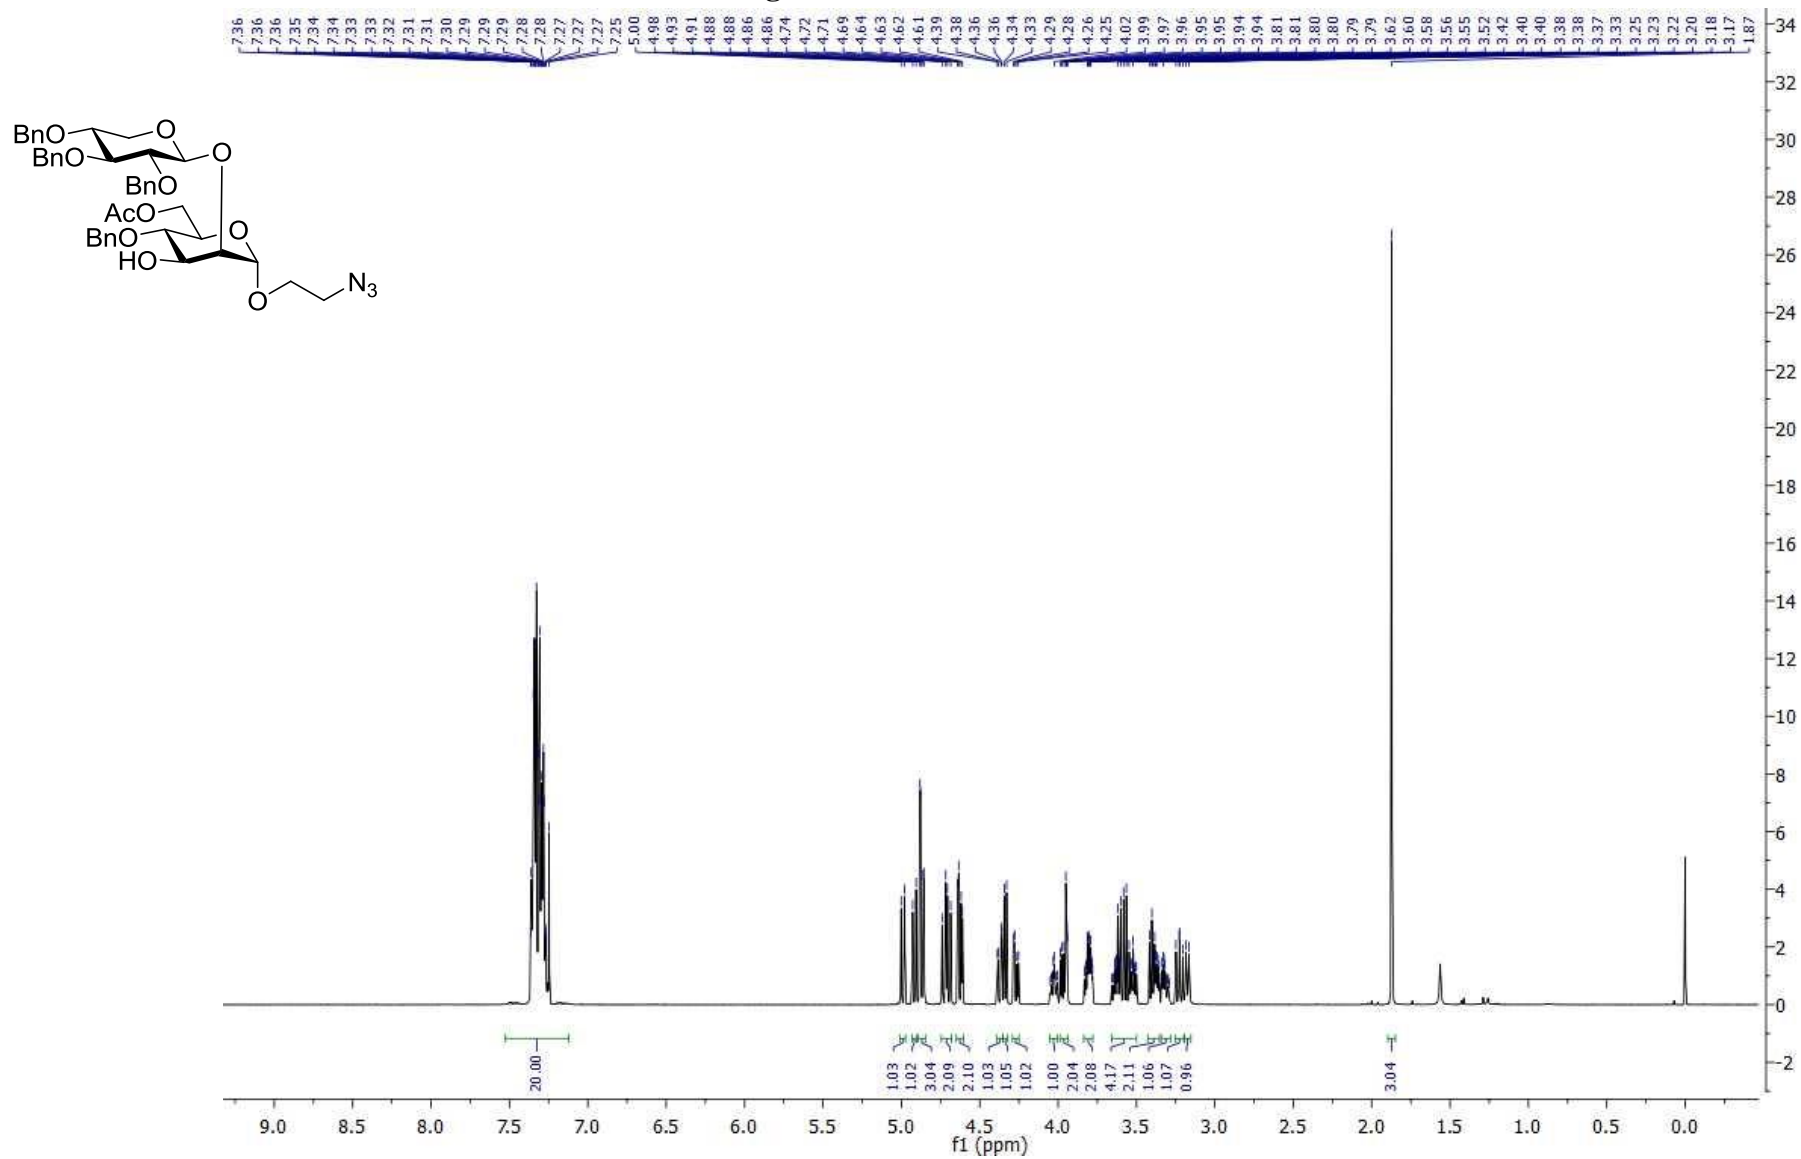

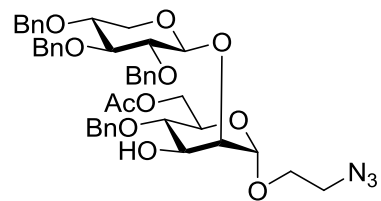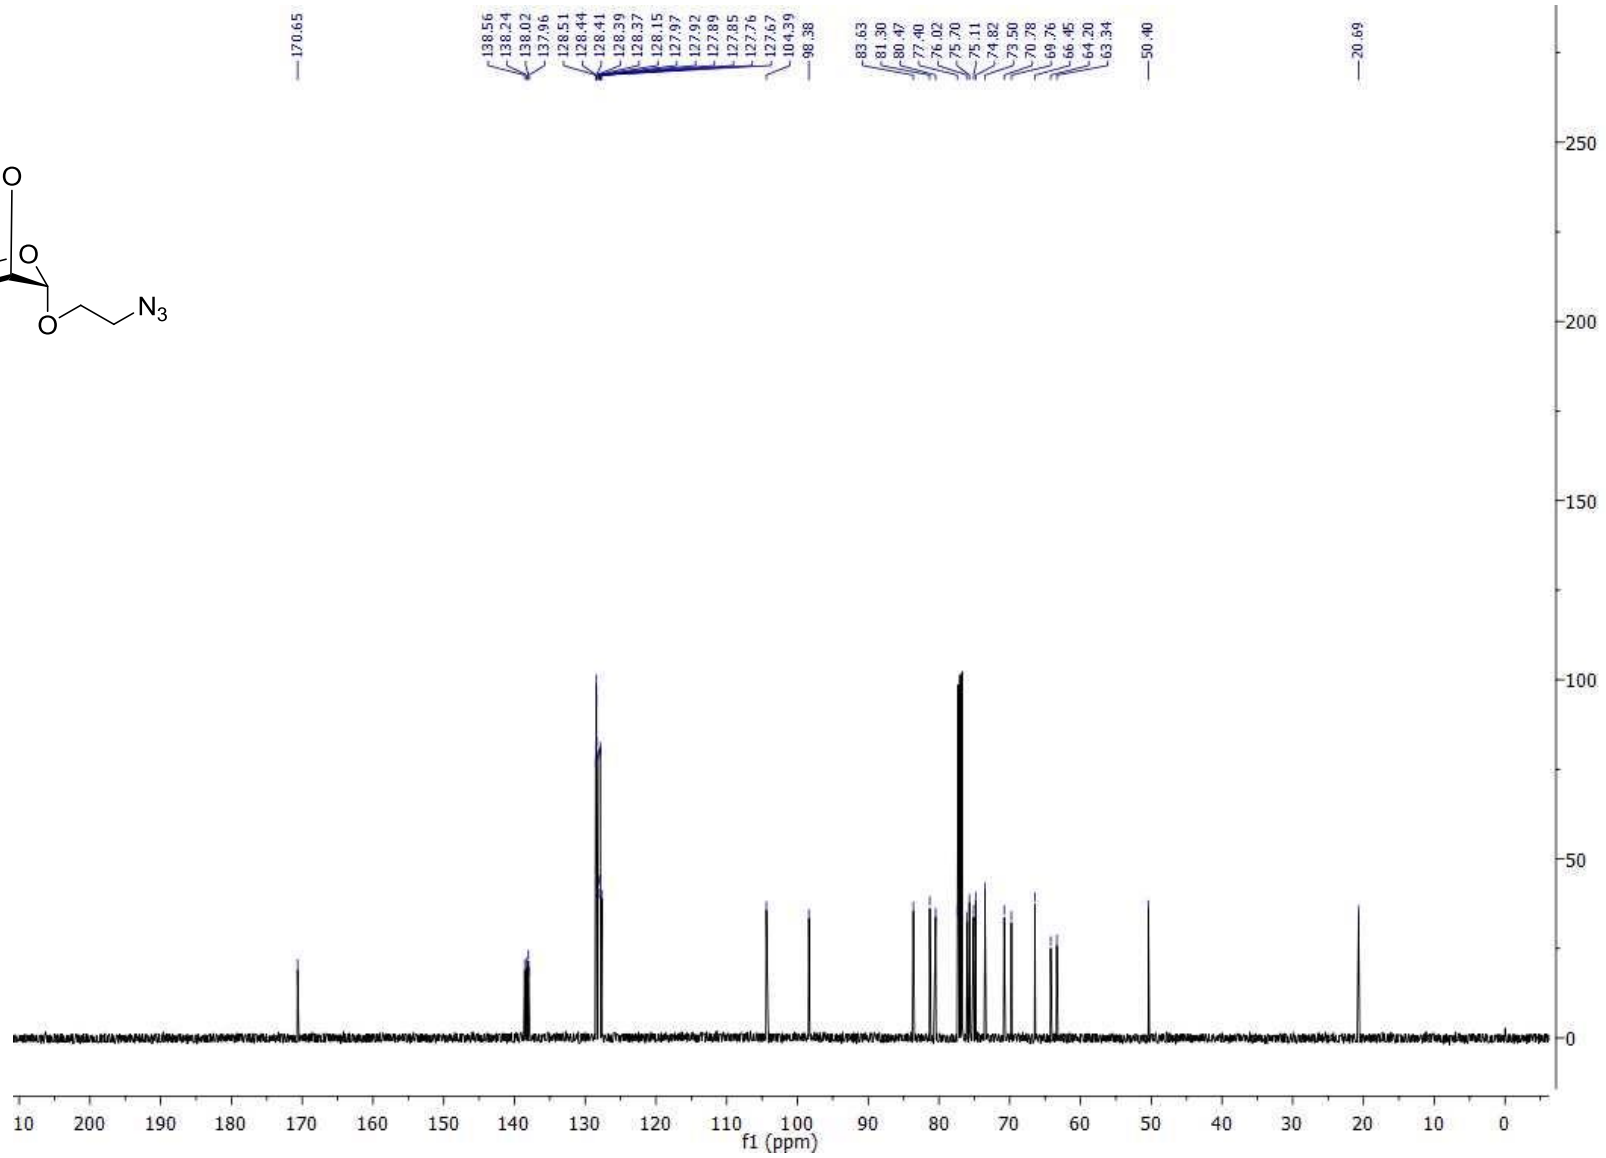

Fig 43: <sup>1</sup>H NMR of 26 at 25 °C

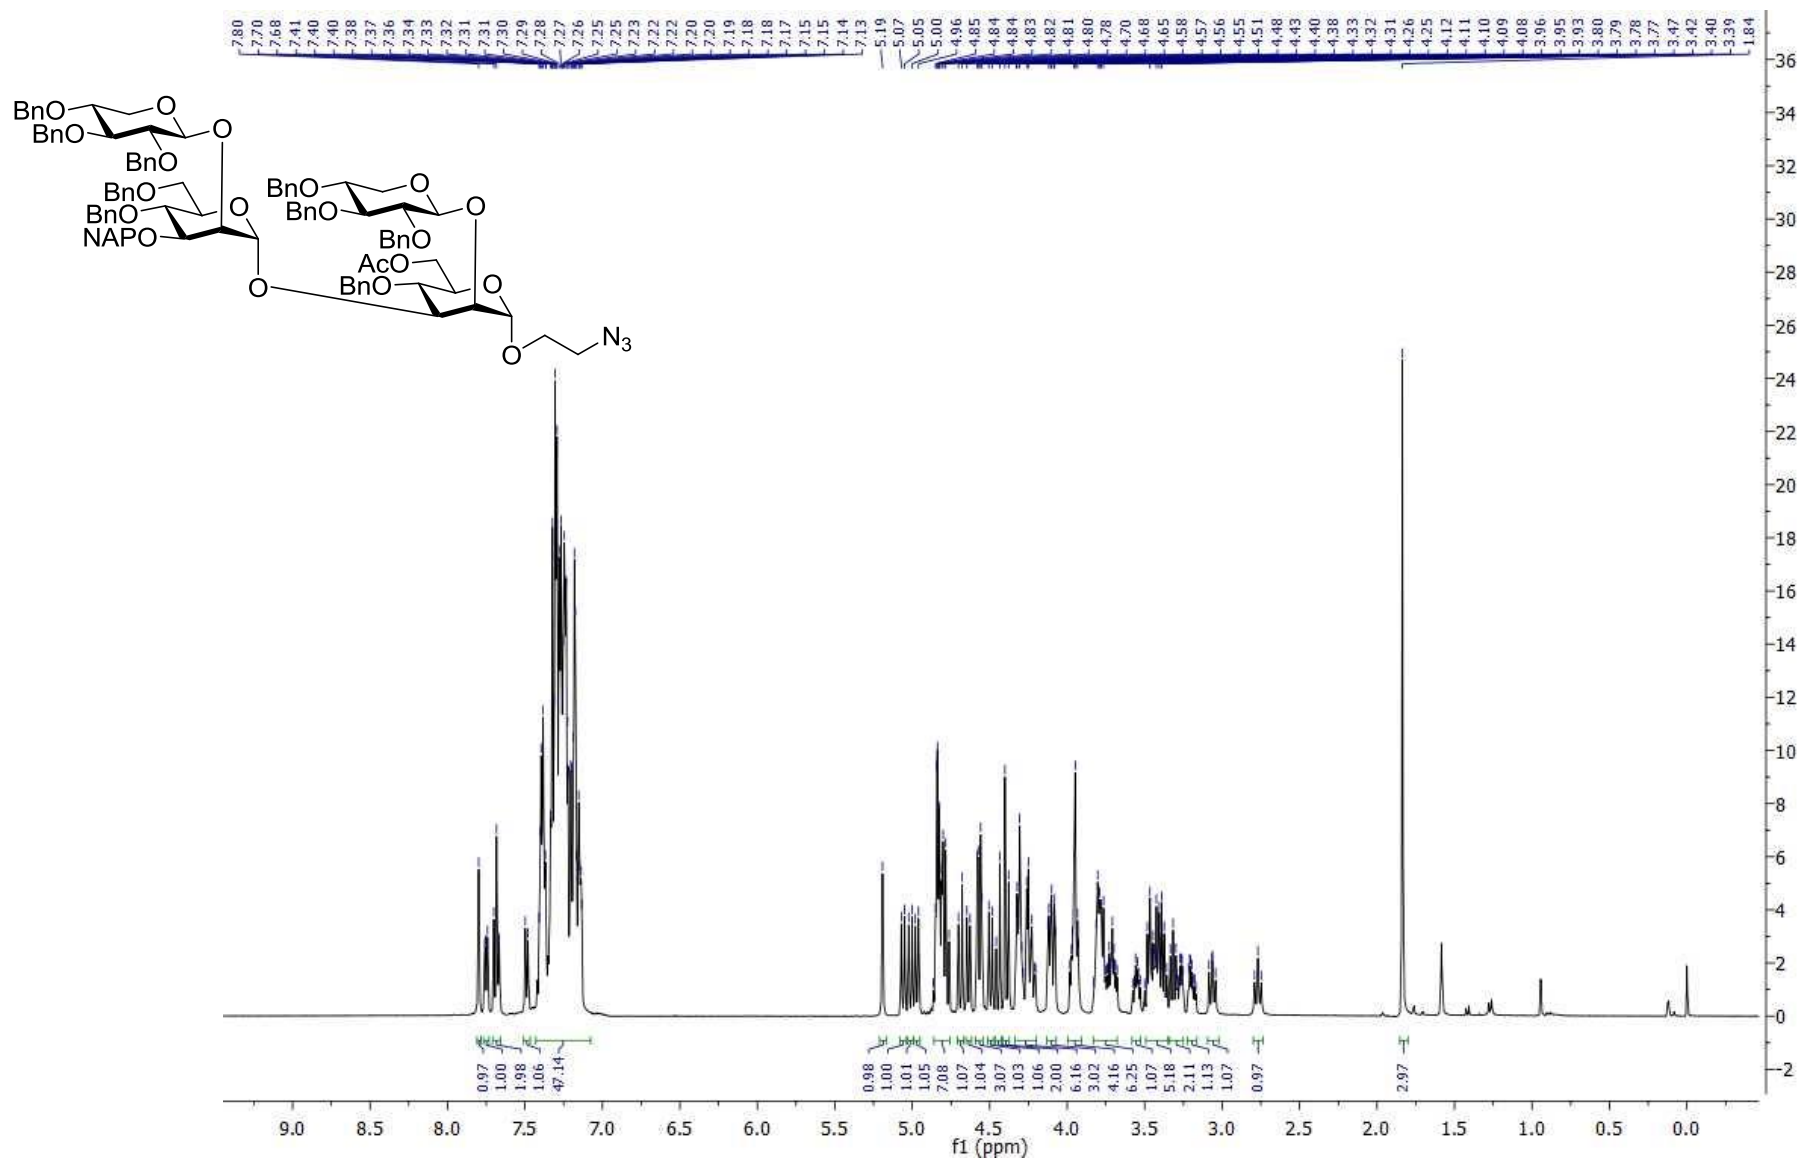

Fig 44:  $^{13}\text{C}$  NMR of 26 at 25 °C

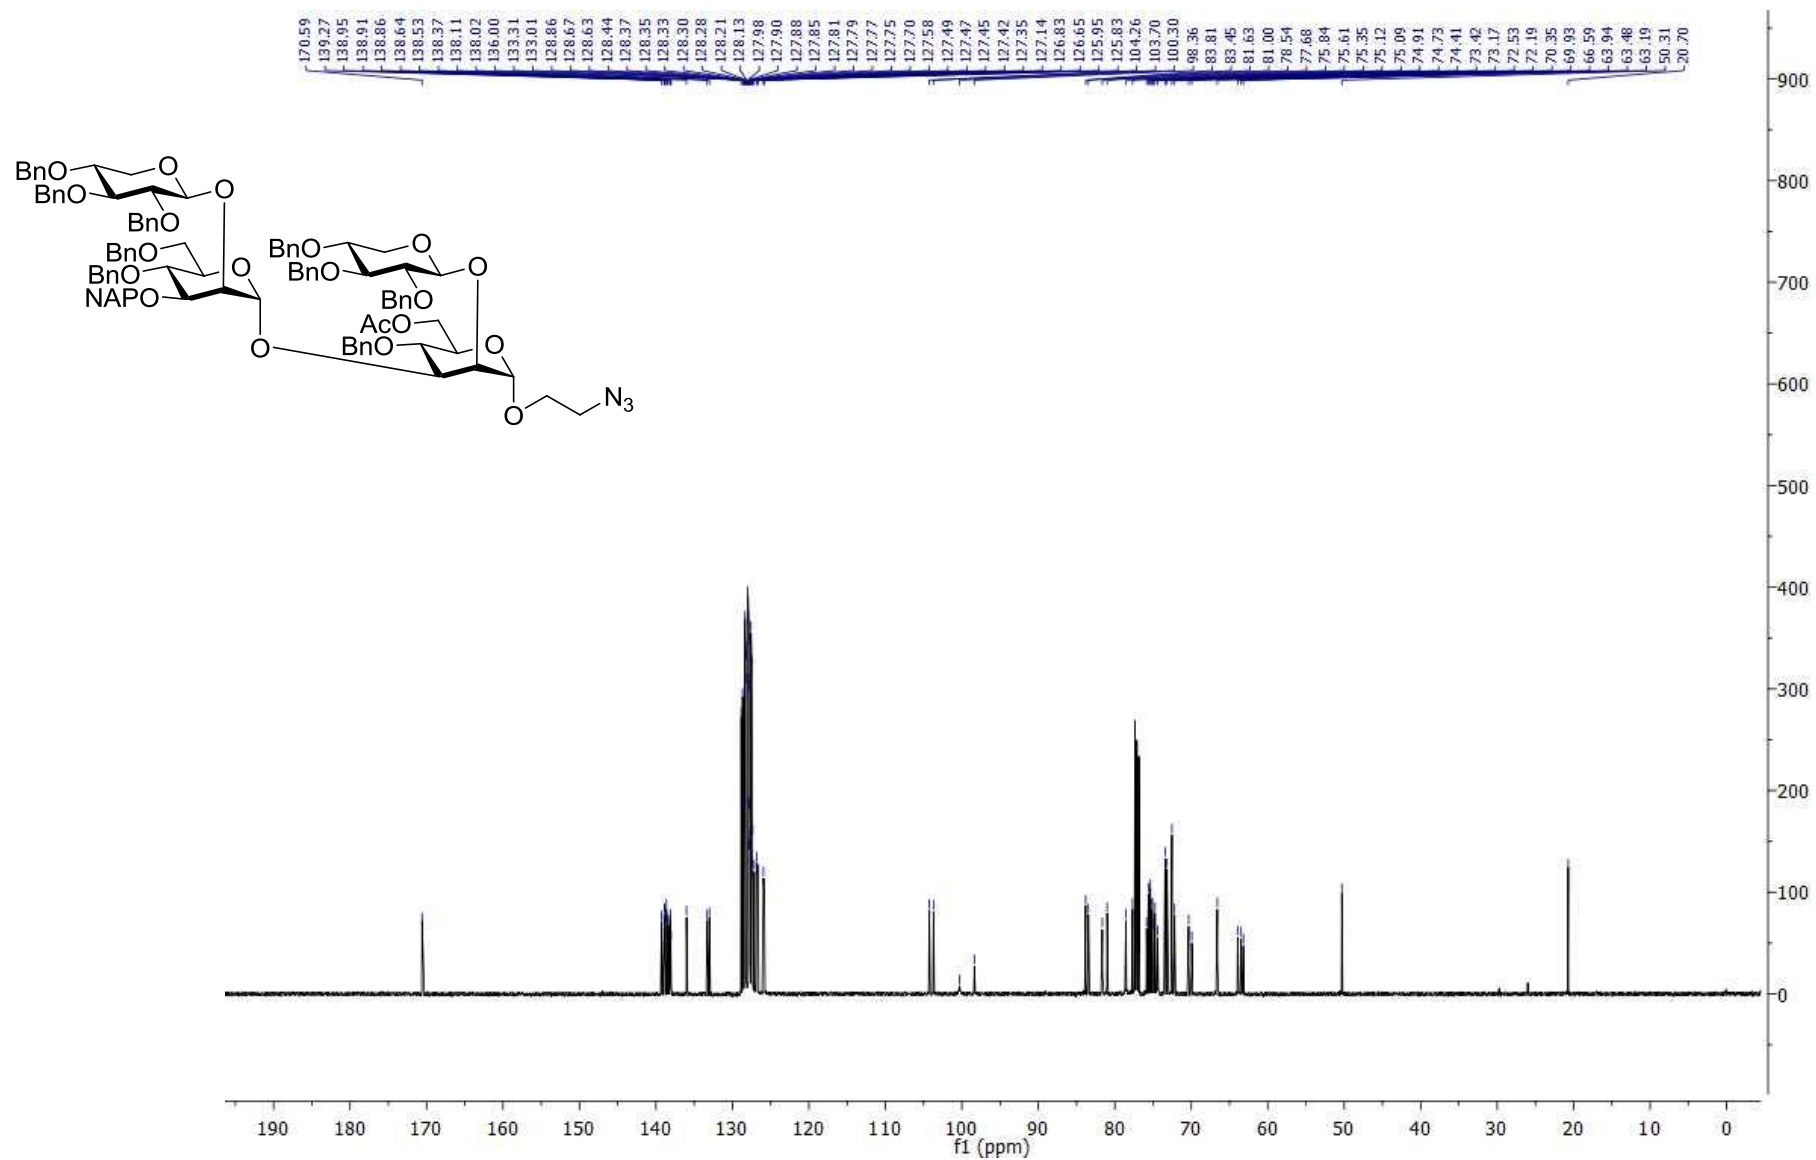

Fig 45: <sup>1</sup>H NMR of 27 at 25 °C

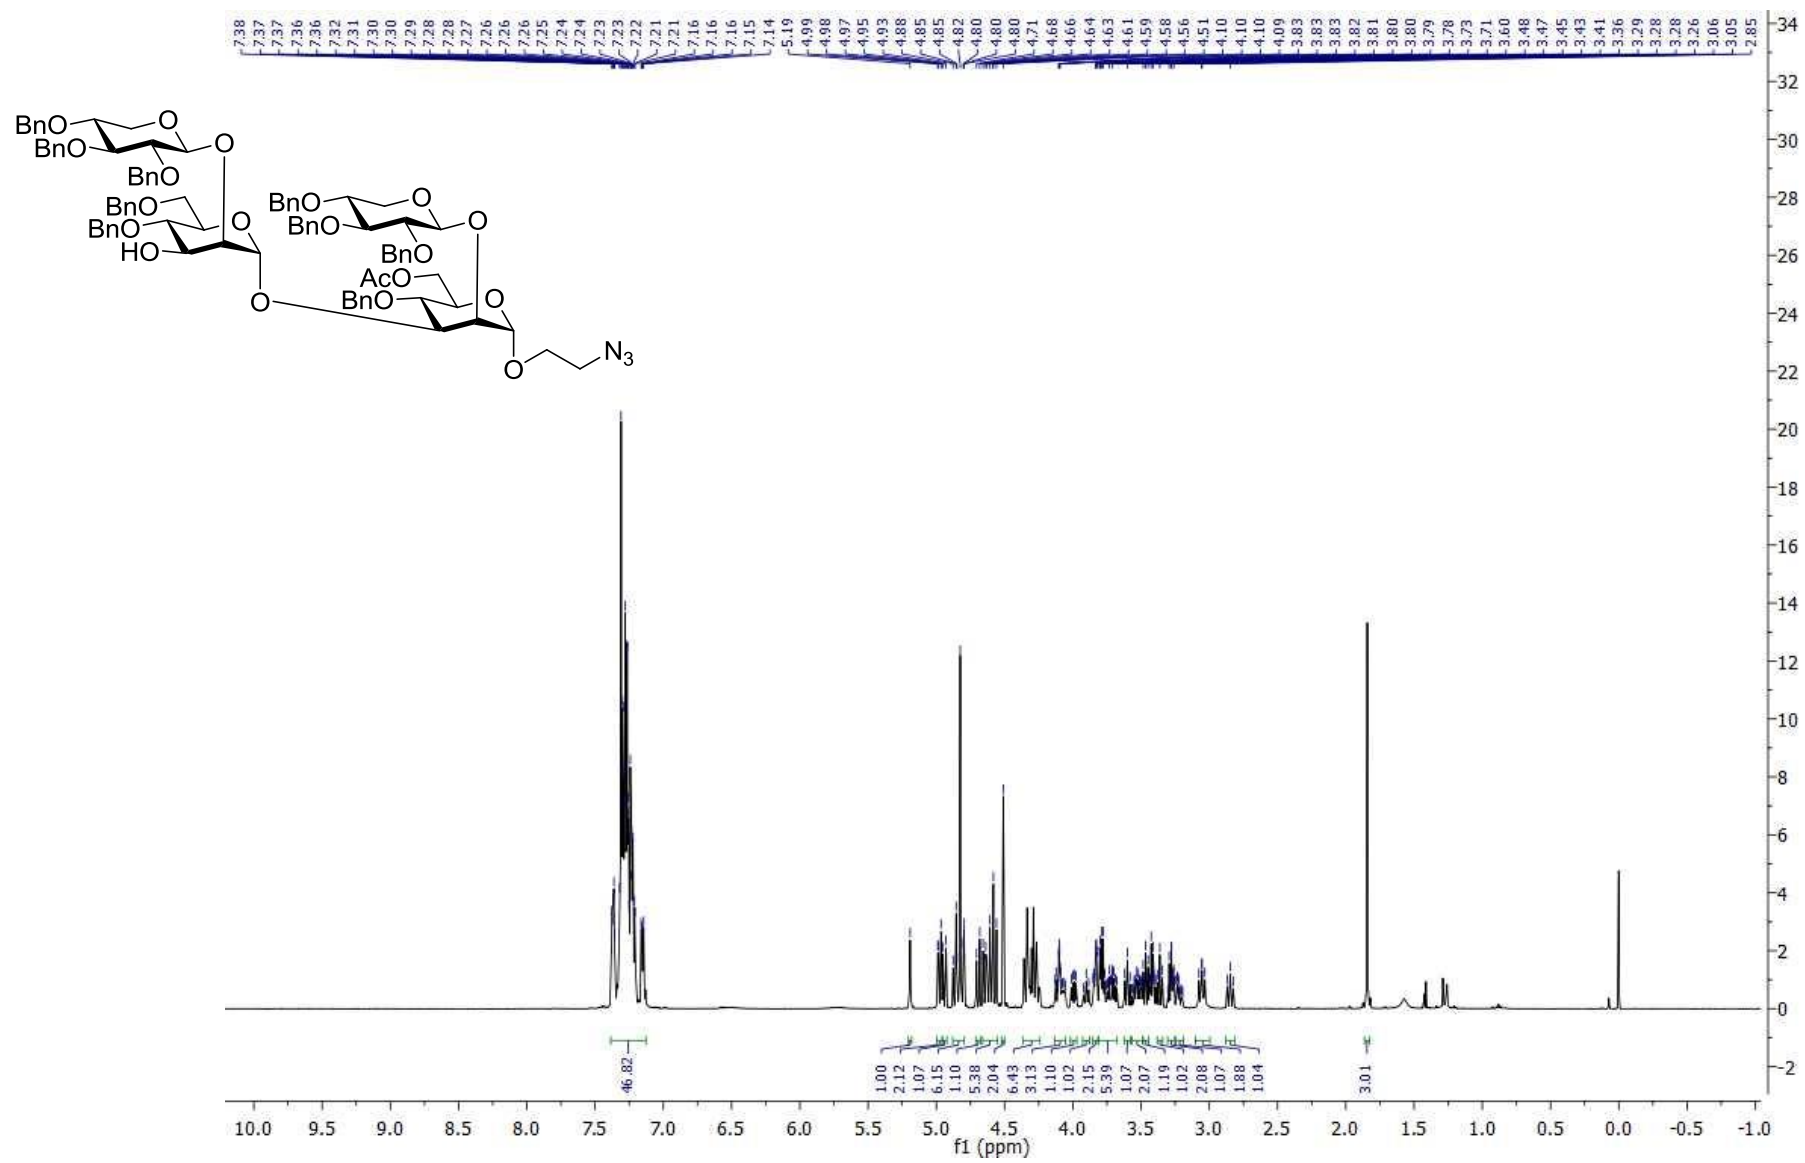

Fig 46:  $^{13}\text{C}$  NMR of **28** at 25 °C

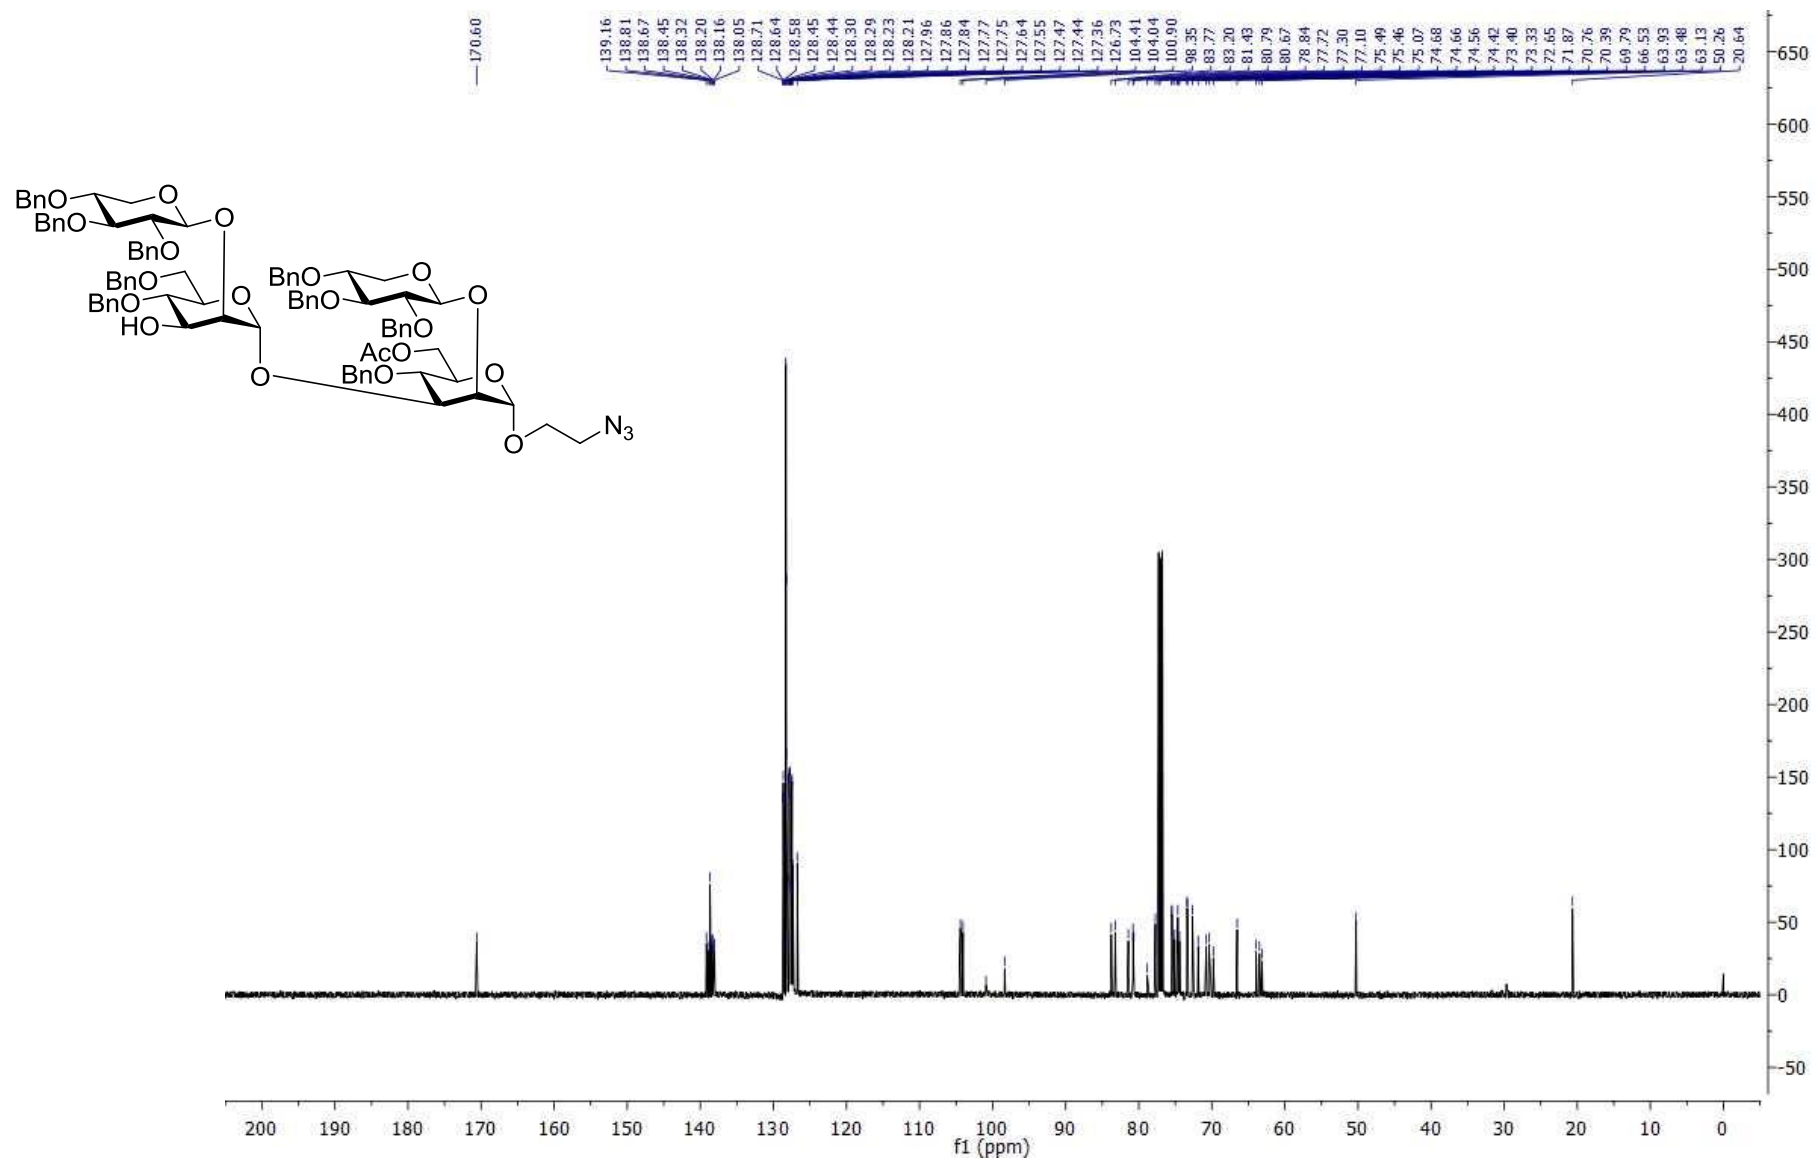



Fig 47:  $^1\text{H}$  NMR of **28** at 25 °C

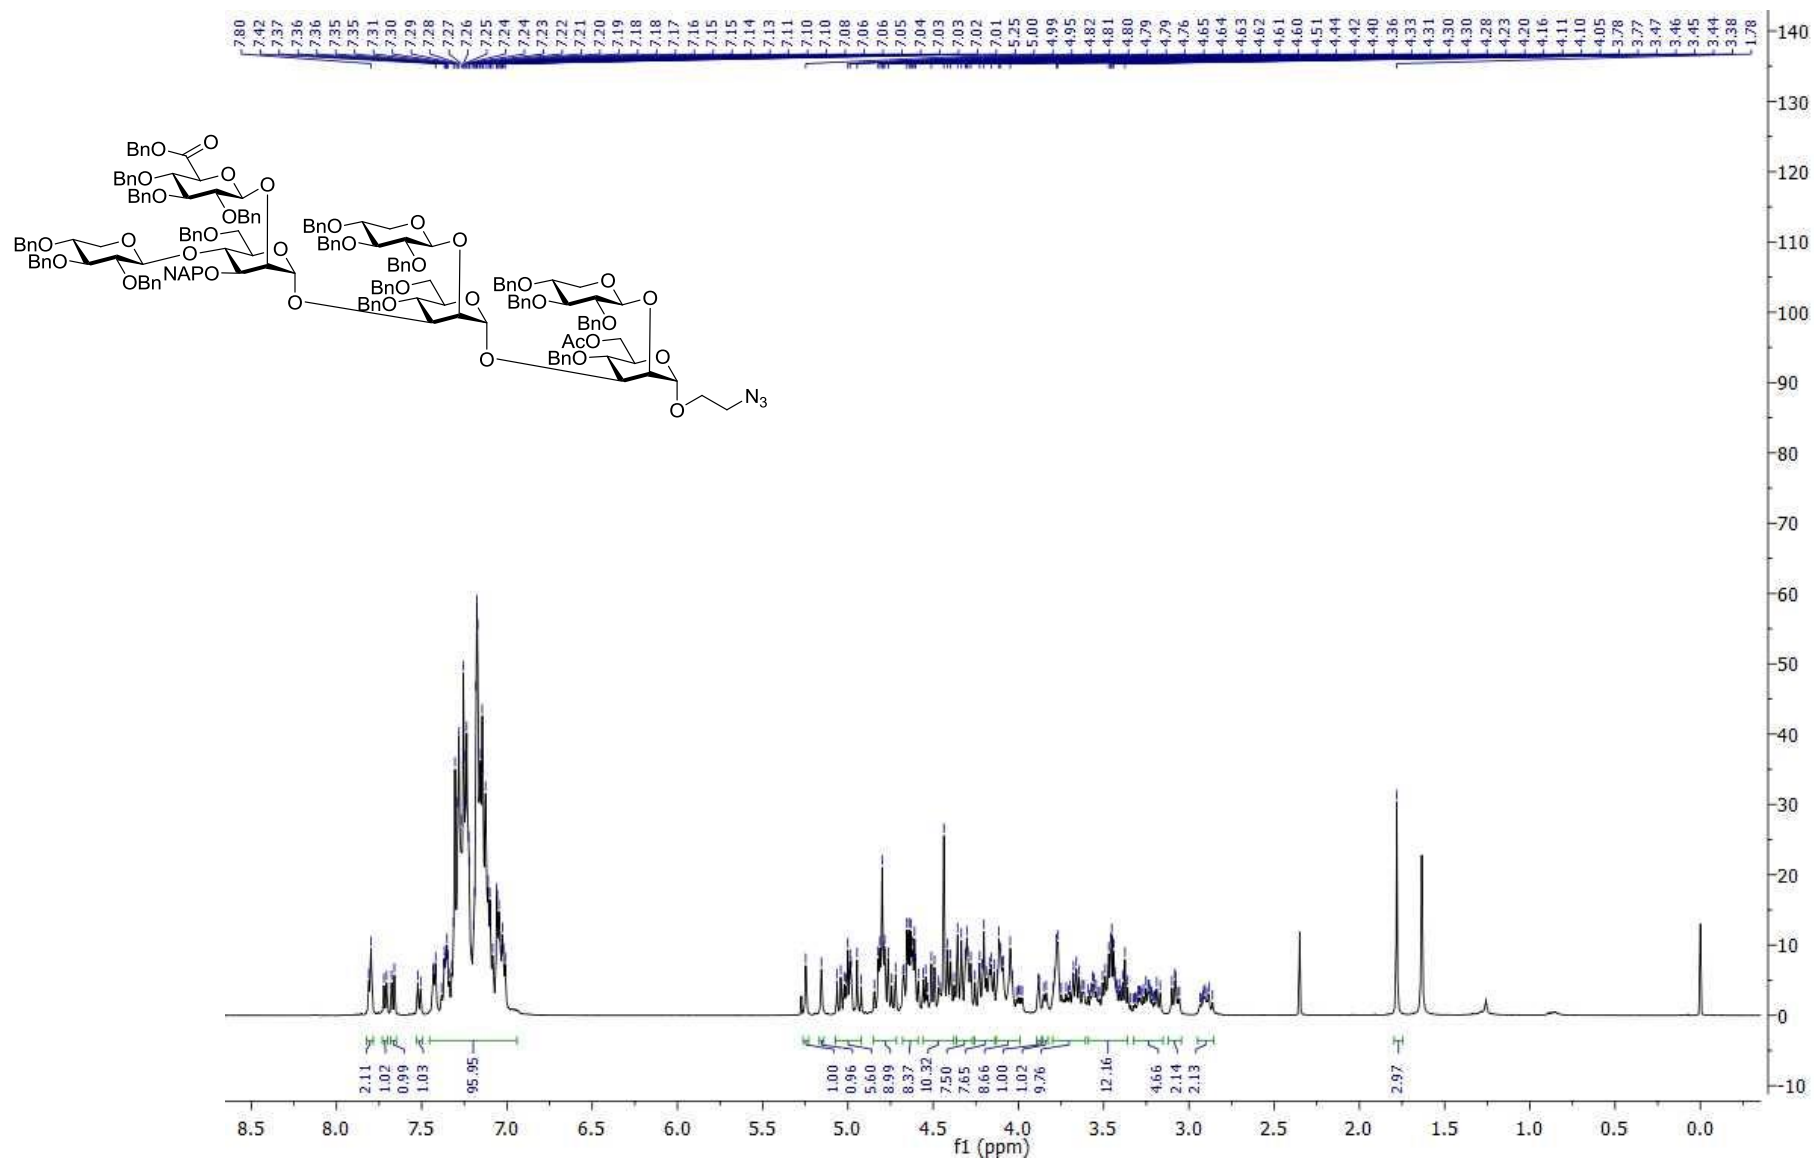

Fig 48:  $^{13}\text{C}$  NMR of **28** at 25 °C

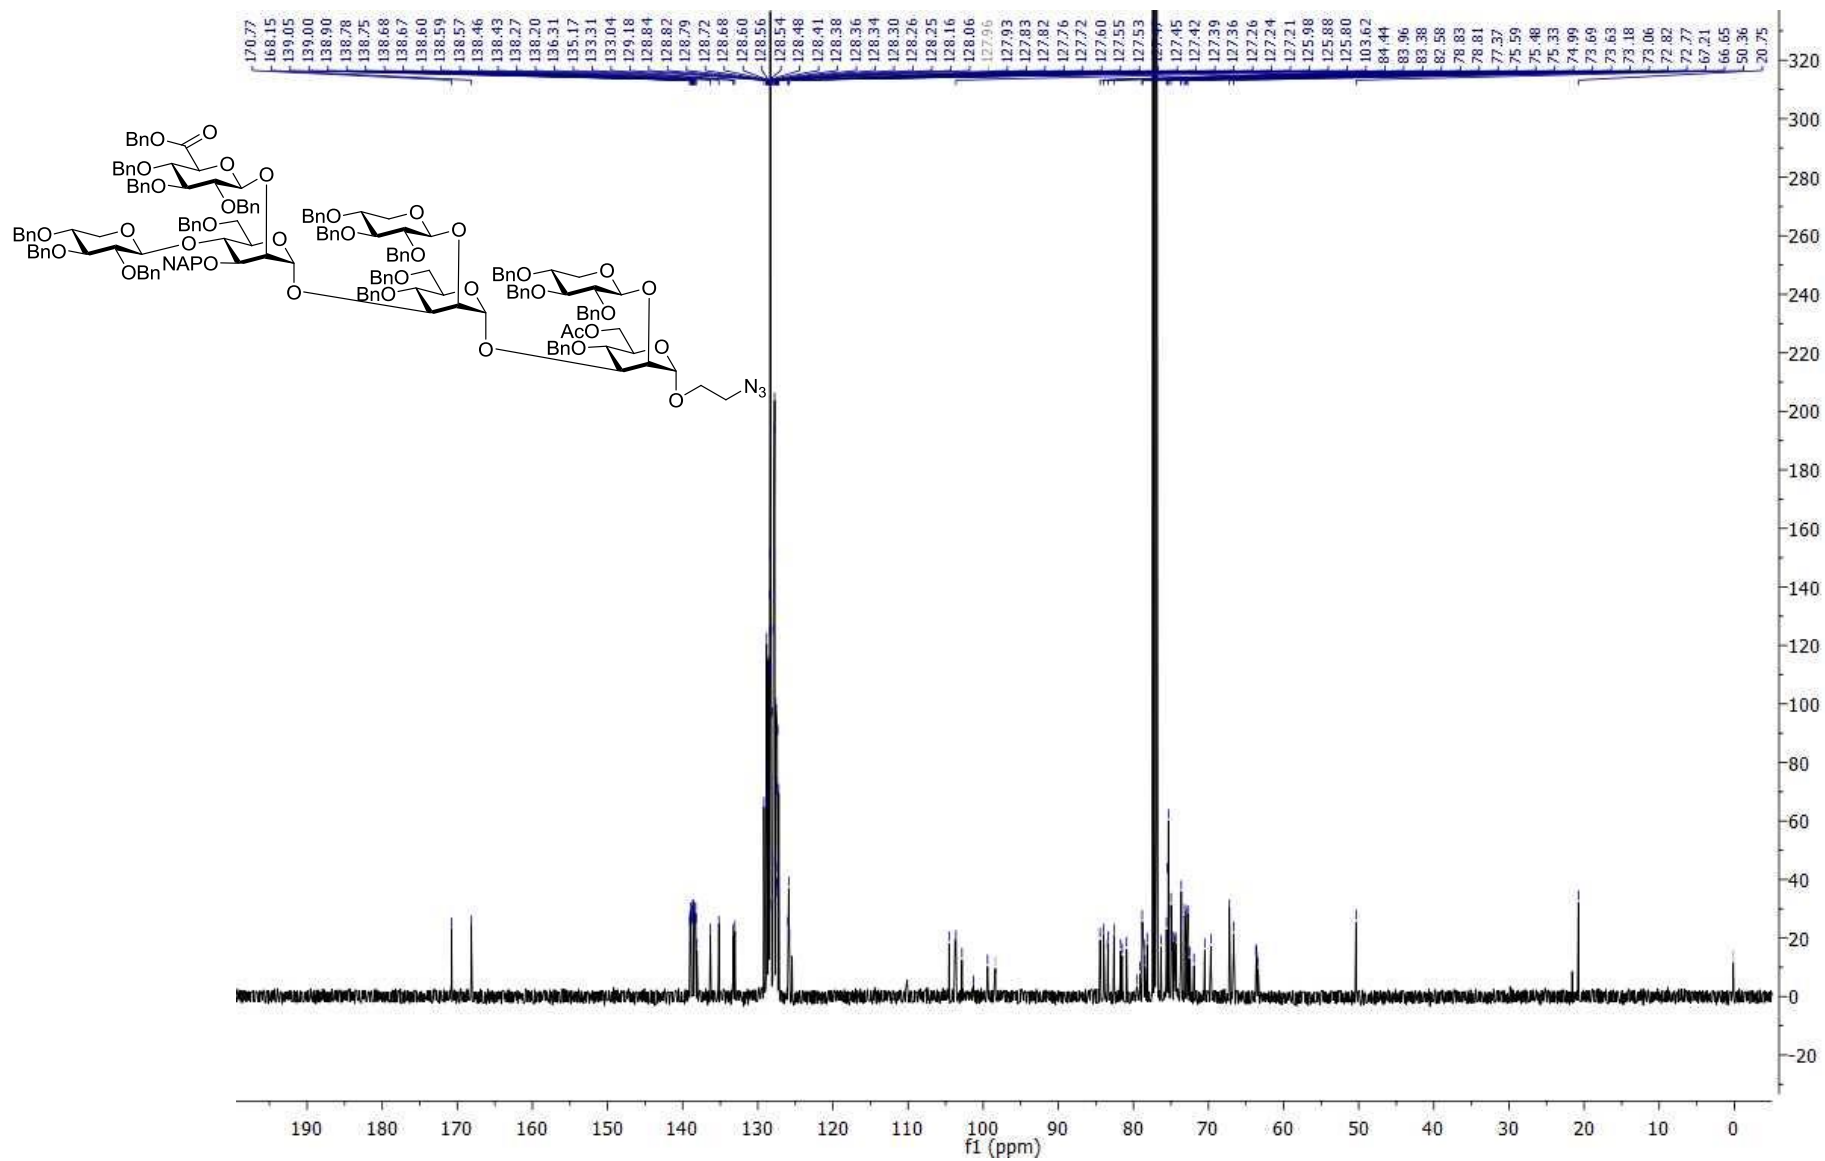

Fig 49: <sup>1</sup>H NMR of 29 at 25 °C

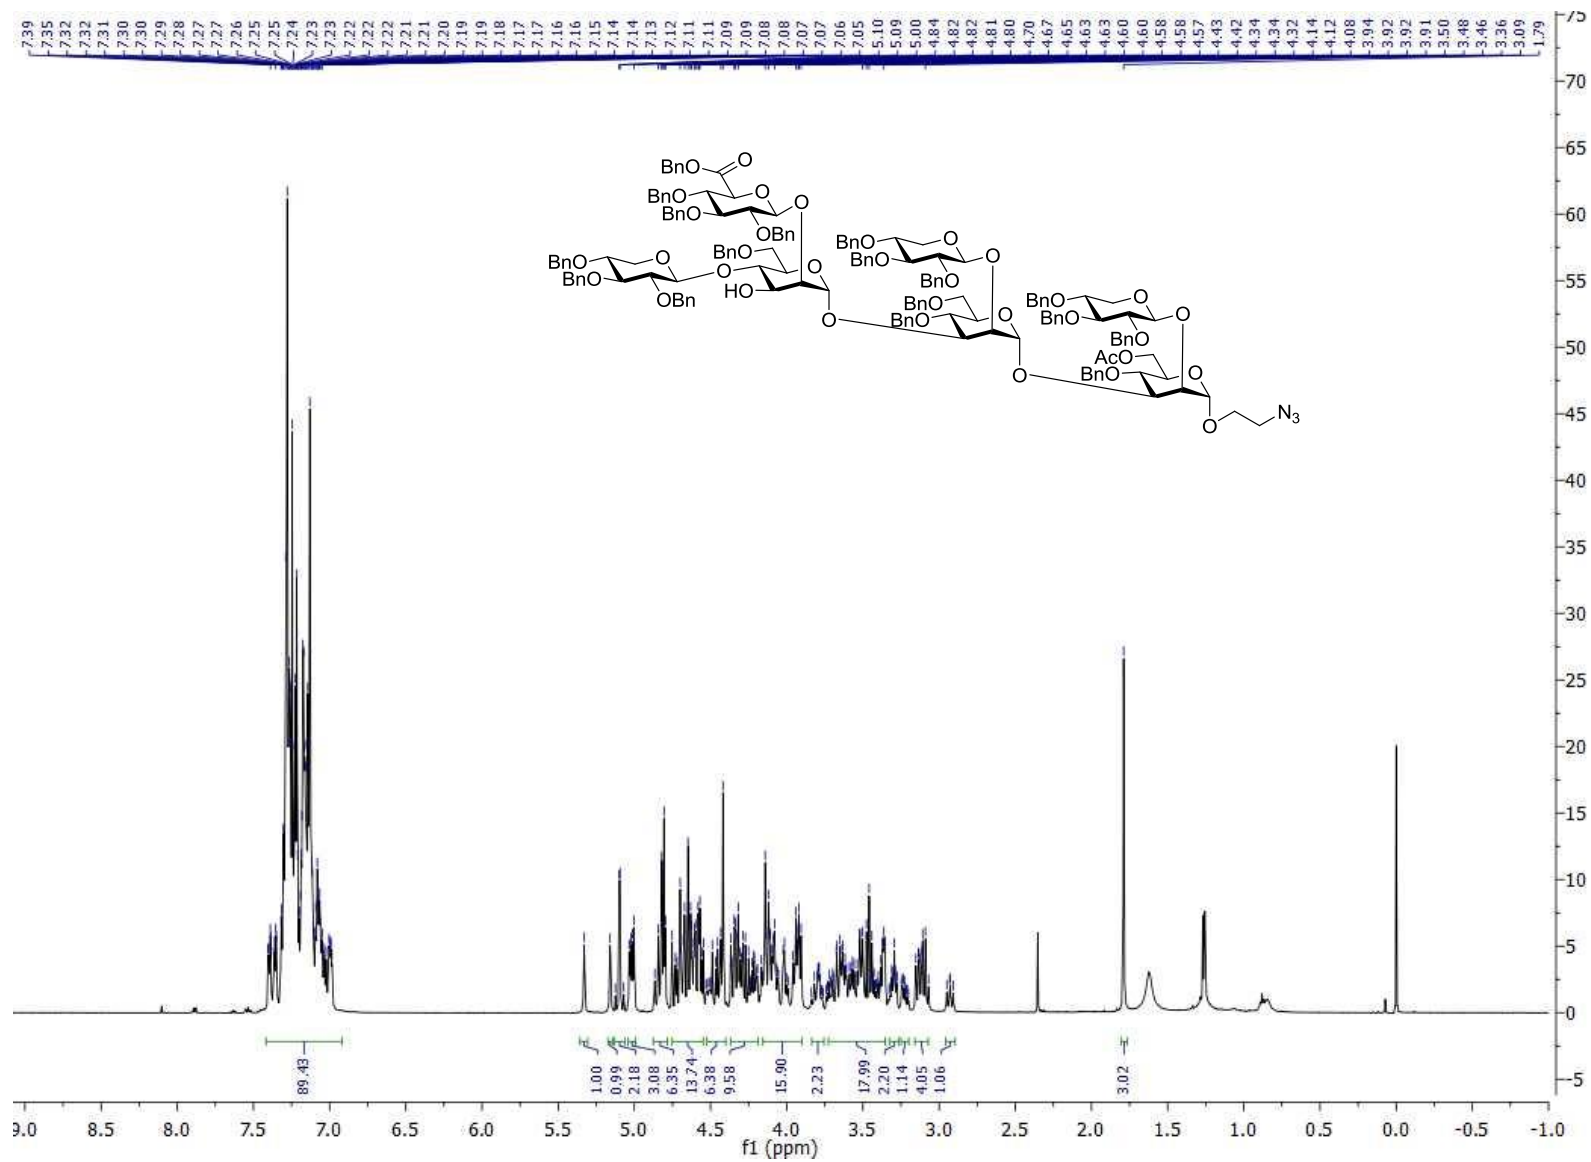

Fig 50:  $^{13}\text{C}$  NMR of **29** at 25 °C

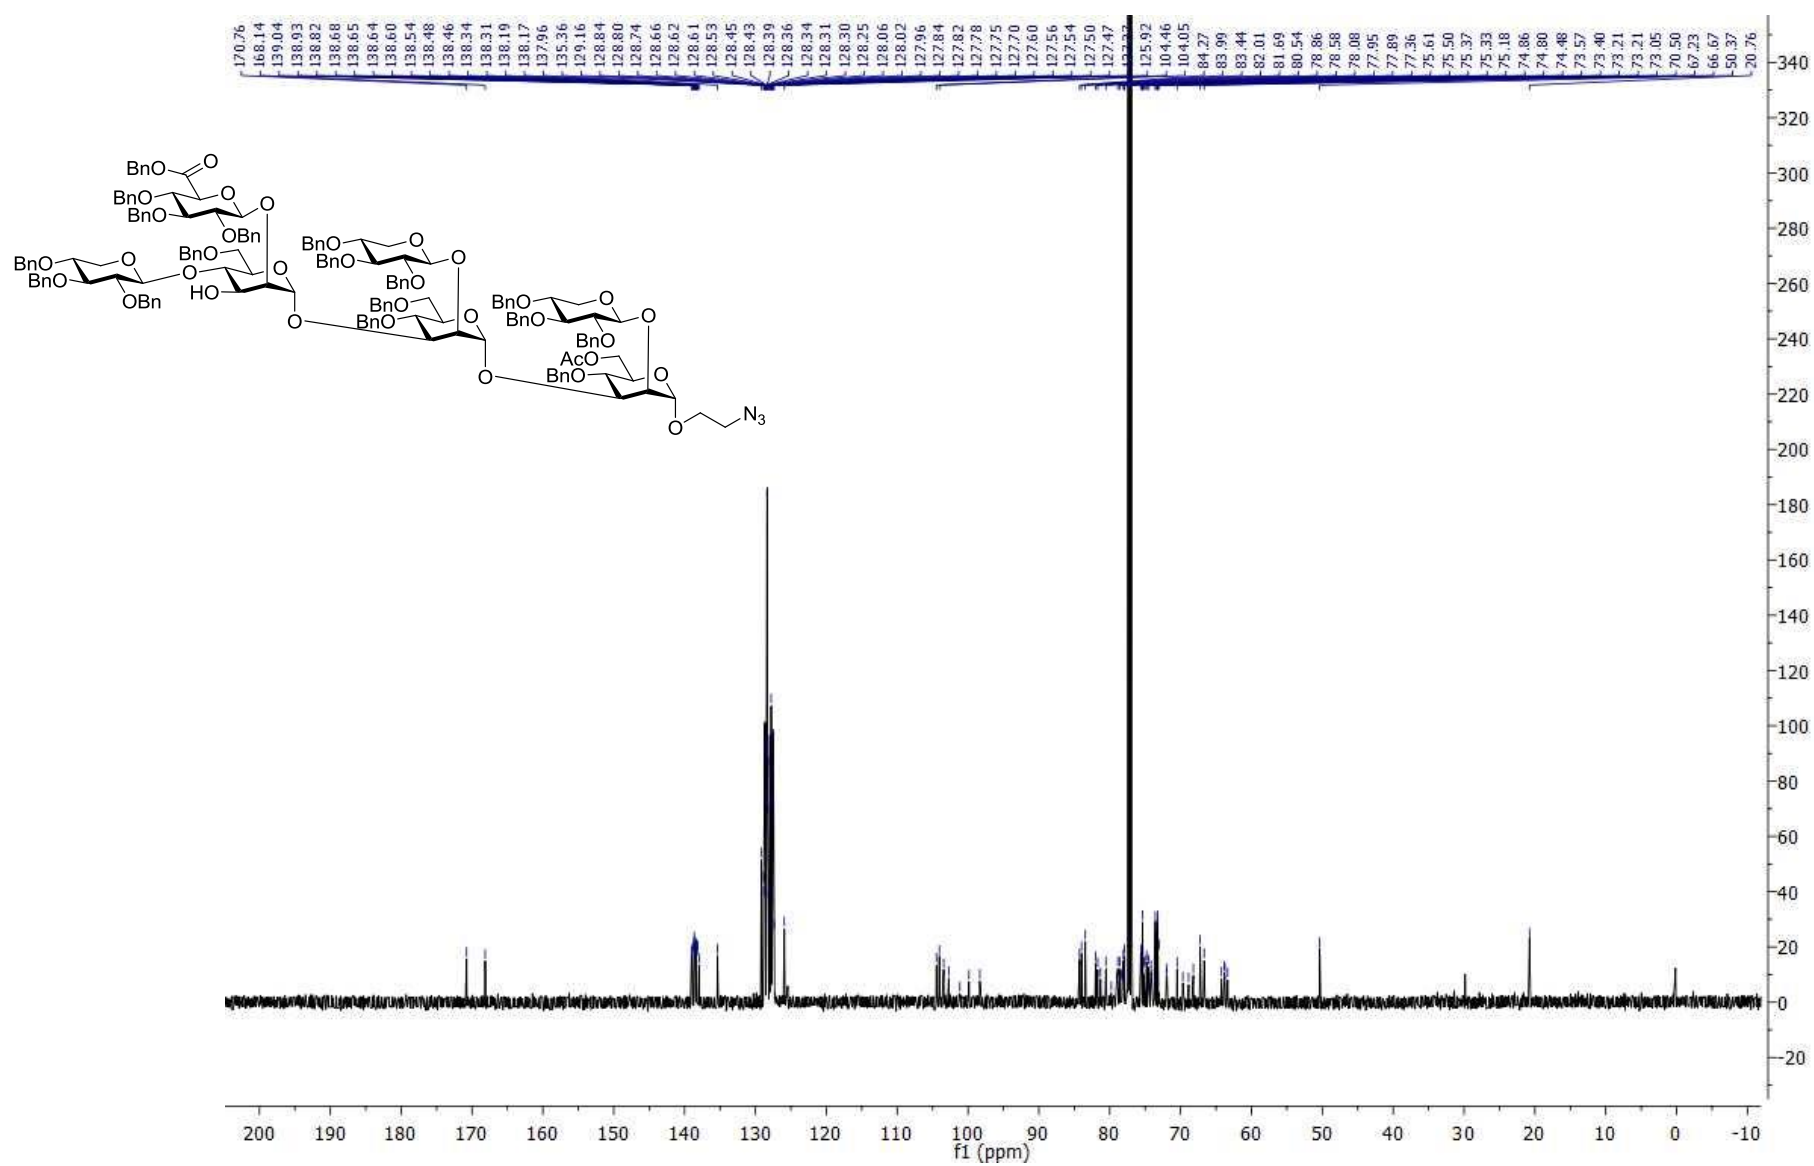

Supplement: OPEN-4-729-s001.pdf [file OPEN-4-729-s001.pdf]
